# Supplementary material for: Transcriptome Meta-Analysis Associated Targeting Hub Genes and Pathways of Drought and Salt Stress Responses in Cotton (Gossypium hirsutum): A Network Biology Approach
Source: Front Plant Sci. 2022 Apr 25;13:818472. doi: 10.3389/fpls.2022.818472 (PMC9083274; doi:10.3389/fpls.2022.818472)
Supplement: Supplementary file 1 [file Table_1.xlsx]

## Sheet: Table S1A
Table S1A: Mapping statistics of leaf and root tissues in salt stress
Tissue	Accession	Cultivar	Isolate	Treatment	Time scale	Geographical location	End	Total Reads	Read length	Uniquely mapped read	Uniquely mapping %
Leaf	SRP242577	TM1	NA	NaCl	NA	US	PE	67191873	292	60385174	89.87
Leaf	SRP242577	TM2	NA	NaCl	NA	US	PE	67207942	292	60378830	89.84
Leaf	SRP043419	NA	NA	NaCl	C	US	PE	5391459	195	4617824	85.65
Leaf	SRP043419	NA	NA	NaCl	4 h	US	PE	6488964	195	5553115	85.58
Leaf	SRP043419	NA	NA	NaCl	24 h	US	PE	7840696	195	6867367	87.59
Leaf	SRP043419	NA	NA	NaCl	C	China	PE	6961435	195	5972865	85.8
Leaf	SRP043419	NA	NA	NaCl	4 h	China	PE	6524237	195	5588784	85.66
Leaf	SRP043419	NA	NA	NaCl	24 h	China	PE	4549514	195	3965765	87.17
Seed	SRP228010	NA	MCCK_12	Mepiquat chloride (MC)	12 h	China	PE	67927895	294	61961864	91.22
Seed	SRP228010	NA	MCCK_24	Mepiquat chloride (MC)	24 h	China	PE	70635168	295	64658941	91.54
Seed	SRP228010	NA	MCT_12	Mepiquat chloride (MC)	12 h	China	PE	63996362	294	58616640	91.59
Seed	SRP228010	NA	MCT	Mepiquat chloride (MC)	24 h	China	PE	69005619	295	63201974	91.59
Seed	SRP228010	NA	WCK	Mepiquat chloride (MC)	12 h	China	PE	71957721	294	65783364	91.42
Seed	SRP228010	NA	WCK	Mepiquat chloride (MC)	24 h	China	PE	68633452	295	62470090	91.02
Seed	SRP228010	NA	WT	Mepiquat chloride (MC)	12 h	China	PE	71758743	294	65733700	91.6
Seed	SRP228010	NA	WT	Mepiquat chloride (MC)	24 h	China	PE	69929255	295	63945604	91.44
Seed	SRP228010	NA	MC	Mepiquat chloride (MC)	NA	China	PE	67419547	294	61619902	91.4
Seed	SRP228010	NA	W	Mepiquat chloride (MC)	NA	China	PE	67413622	294	61942071	91.88
Root	SRP157859	H15	H15_ck	NaCl	C	China	PE	57556032	291	50655557	88.01
Root	SRP157859	H15	H15_15MIN	NaCl	15MIN	China	PE	57489745	289	51325201	89.28
Root	SRP157859	H15	H15_1	NaCl	1 h	China	PE	58056013	290	52366263	90.2
Root	SRP157859	H15	H15_3	NaCl	3 h	China	PE	58203249	290	52732397	90.2
Root	SRP157859	H15	H15_6	NaCl	6 h	China	PE	58041551	290	52229778	89.99
Root	SRP157859	H15	H15_12	NaCl	12 h	China	PE	57451196	290	52417180	91.24
Root	SRP157859	H15	H15_24	NaCl	24 h	China	PE	56677497	288	49400901	87.16
Root	SRP157859	H15	H15_48	NaCl	48 h	China	PE	56997179	289	48653240	85.36
Root	SRP157859	ZM12	ZM12_ck	NaCl	C	China	PE	57556032	291	50655557	88.01
Root	SRP157859	ZM12	ZM12_15MIN	NaCl	15MIN	China	PE	57489745	289	51325201	89.28
Root	SRP157859	ZM12	ZM12_1	NaCl	1 h	China	PE	58056013	290	52366263	90.2
Root	SRP157859	ZM12	ZM12_3	NaCl	3 h	China	PE	58203249	290	52732397	90.6
Root	SRP157859	ZM12	ZM12_6	NaCl	6 h	China	PE	58041551	290	52229778	89.99
Root	SRP157859	ZM12	ZM12_12	NaCl	12 h	China	PE	57451196	290	52417180	91.24
Root	SRP157859	ZM12	ZM12_24	NaCl	24 h	China	PE	56677497	288	49400901	87.16
Root	SRP157859	ZM12	ZM12_48	NaCl	48 h	China	PE	56997179	289	48653240	85.36
Root	SRP192537	NA	salt_C	NaCl	C	NA	PE	55843738	292	51431366	92.1
Root	SRP192537	NA	salt_6	NaCl	6 h	NA	PE	55298522	292	51285003	92.74
Root	SRP192537	NA	salt_12	NaCl	12 h	NA	PE	61325666	291	56992209	92.93
Root	SRP192537	NA	salt_24	NaCl	24 h	NA	PE	71776767	291	66665377	92.88
Root	SRP192537	NA	salt_48	NaCl	48 h	NA	PE	71353567	291	66196718	92.77
Root	SRP192537	NA	salt_72	NaCl	72 h	NA	PE	70675918	291	65330142	92.44

## Sheet: Table S1B
Table S1B: Mapping statistics of leaf and root tissues in drought stress
Tissue	Accession	Cultivar	Isolate	Treatment	Time scale	Geographical location	End	Total Reads	Read length	Uniquely mapped read	Uniquely mapping %
Root	SRP192537	NA	drought_C	PEG	C	NA	PE	55843738	292	51431366	92.1
Root	SRP192537	NA	drought_6	PEG	6 h	NA	PE	61756630	292	57466146	93.05
Root	SRP192537	NA	drought_12	PEG	12 h	NA	PE	71088051	291	65819511	92.59
Root	SRP192537	NA	drought_24	PEG	24 h	NA	PE	71956797	292	66791734	92.82
Root	SRP192537	NA	drought_48	PEG	48 h	NA	PE	76844092	292	71365760	92.87
Root	SRP192537	NA	drought_72	PEG	72 h	NA	PE	70622500	291	65577150	92.86
LEAF	SRP166405	TM-1	not collected	PEG	1 h	missing	PE	76372178	295	71487565	93.6
LEAF	SRP166405	TM-1	not collected	PEG	3 h	missing	PE	83138496	295	76789887	92.36
LEAF	SRP166405	TM-1	not collected	PEG	6 h	missing	PE	80719719	295	75889459	94.02
LEAF	SRP166405	TM-1	not collected	PEG	12 h	missing	PE	77104000	295	72208241	93.65
LEAF	SRP166405	TM-1	not collected	PEG	24 h	missing	PE	51349344	295	48157846	93.78
