# Supplementary material for: Transcriptome Meta-Analysis Associated Targeting Hub Genes and Pathways of Drought and Salt Stress Responses in Cotton (Gossypium hirsutum): A Network Biology Approach
Source: Front Plant Sci. 2022 Apr 25;13:818472. doi: 10.3389/fpls.2022.818472 (PMC9083274; doi:10.3389/fpls.2022.818472)
Supplement: Supplementary file 2 [file Table_2.xlsx]

## Sheet: S2A
Table S2A: Estimation of closeness connectivity, betweenness centrality (Cb), eccentricity and degree centrality (k) in drought
Drought up-regulated (leaf)
Gene name	AverageShortestPathLength	BetweennessCentrality	ClosenessCentrality	ClusteringCoefficient	Degree	IsSingleNode	NeighborhoodConnectivity	TopologicalCoefficient
SBT56	2.11111	0.014369	0.473684	0.779035	52	FALSE	43.9038	0.627198
EXPB2	2.11111	0.014369	0.473684	0.779035	52	FALSE	43.9038	0.627198
CHSY	2.11111	0.014369	0.473684	0.779035	52	FALSE	43.9038	0.627198
TLP3	2.11111	0.014369	0.473684	0.779035	52	FALSE	43.9038	0.627198
TAT2	2.0505	0.025382	0.487685	0.707755	50	FALSE	43.78	0.608056
GUN6	2.0505	0.025352	0.487685	0.699592	50	FALSE	43.6	0.605556
PLP2	2.08081	0.019174	0.480583	0.746939	50	FALSE	44.26	0.62338
EXPB3	2.08081	0.01628	0.480583	0.780408	50	FALSE	44.42	0.625634
RPB7	2.13131	0.010994	0.469194	0.791837	50	FALSE	44.38	0.634
DNJ11	2.16162	0.007053	0.462617	0.809796	50	FALSE	44.12	0.648824
MYB15	2.16162	0.007053	0.462617	0.809796	50	FALSE	44.12	0.648824
PLY5	2.16162	0.007053	0.462617	0.809796	50	FALSE	44.12	0.648824
DTX20	2.16162	0.007053	0.462617	0.809796	50	FALSE	44.12	0.648824
WAK2	2.09091	0.015669	0.478261	0.765306	49	FALSE	44.6122	0.628341
DRPE	2.09091	0.015669	0.478261	0.765306	49	FALSE	44.6122	0.628341
KPRS1	2.20202	0.004678	0.454128	0.82398	49	FALSE	44.1837	0.679749
REM41	2.20202	0.004678	0.454128	0.82398	49	FALSE	44.1837	0.679749
EXLB1	2.07071	0.019743	0.482927	0.70922	48	FALSE	43.75	0.607639
WIN1	2.21212	0.003567	0.452055	0.837766	48	FALSE	44.2708	0.68109
NRG2	2.08081	0.017618	0.480583	0.714154	47	FALSE	43.8085	0.608452
DNJB8	2.11111	0.011831	0.473684	0.777058	47	FALSE	44.9575	0.633203
E133	2.36364	0.001899	0.423077	0.867633	46	FALSE	44.4565	0.717041
GDL79	2.36364	0.001899	0.423077	0.867633	46	FALSE	44.4565	0.717041
DR100	2.48485	0.001504	0.402439	0.882828	45	FALSE	44.5556	0.730419
TLC1	2.48485	0.001504	0.402439	0.882828	45	FALSE	44.5556	0.730419
EXP15	2.49495	0.001229	0.40081	0.897463	44	FALSE	44.6364	0.731744
EFMT2	2.12121	0.010618	0.471429	0.737542	43	FALSE	43.9767	0.610788
MYB4	2.50505	0.000971	0.399194	0.912514	43	FALSE	44.6977	0.732749
PMEI3	2.50505	0.000971	0.399194	0.912514	43	FALSE	44.6977	0.732749
BAD1	2.50505	0.000971	0.399194	0.912514	43	FALSE	44.6977	0.732749
SRG1	2.50505	0.000971	0.399194	0.912514	43	FALSE	44.6977	0.732749
PGLR4	1.92929	0.053756	0.518325	0.67712	42	FALSE	40.9286	0.524725
ERECT	1.92929	0.035315	0.518325	0.703833	42	FALSE	42.4048	0.543651
TNG2	2.13131	0.009119	0.469194	0.744483	42	FALSE	44	0.611111
LRKS4	2.51515	0.000769	0.39759	0.924506	42	FALSE	44.6667	0.73224
Y2179	1.93939	0.029609	0.515625	0.709756	41	FALSE	42.2927	0.542214
SAG39	2.0404	0.0147	0.490099	0.740244	41	FALSE	43.5854	0.588991
OFP1	2.52525	0.000579	0.396	0.936585	41	FALSE	44.6098	0.731307
CHE1	2.52525	0.000579	0.396	0.936585	41	FALSE	44.6098	0.731307
AHL9	1.93939	0.049587	0.515625	0.678205	40	FALSE	39.35	0.498101
PER53	2.0303	0.013301	0.492537	0.737179	40	FALSE	43.125	0.567434
EXPA4	2.54546	0.000411	0.392857	0.947436	40	FALSE	44.5	0.741667
BH146	1.94949	0.039144	0.512953	0.692308	39	FALSE	39.718	0.502759
CRR38	2.62626	0.000267	0.380769	0.958165	39	FALSE	44.3846	0.792582
STY46	2.62626	0.000267	0.380769	0.958165	39	FALSE	44.3846	0.792582
USPAL	2.63636	0.000198	0.37931	0.967283	38	FALSE	44.3421	0.791823
PRP2	2.65657	0.00014	0.376426	0.974474	37	FALSE	44.2162	0.803931
SCP34	1.9697	0.032636	0.507692	0.714286	36	FALSE	37.3889	0.48557
TLP5	2.65657	9.27e-05	0.376426	0.98254	36	FALSE	44.1389	0.788194
COL10	2	0.024129	0.5	0.727731	35	FALSE	37.0571	0.494095
NCED1	2	0.024129	0.5	0.727731	35	FALSE	37.0571	0.494095
U83A1	2.69697	3.51e-05	0.370787	0.991597	35	FALSE	44	0.830189
GWD1	2.69697	3.51e-05	0.370787	0.991597	35	FALSE	44	0.830189
WRK70	2.76768	1.29e-05	0.361314	0.996435	34	FALSE	43.8529	0.843326
12KD	2.77778	0	0.36	1	33	FALSE	43.697	0.840326
SBH2	2.77778	0	0.36	1	33	FALSE	43.697	0.840326
ABIL5	2.06061	0.016503	0.485294	0.766129	32	FALSE	35.2812	0.496919
BAG	2.06061	0.016503	0.485294	0.766129	32	FALSE	35.2812	0.496919
ELF4	2.06061	0.016503	0.485294	0.766129	32	FALSE	35.2812	0.496919
RGP1	2.06061	0.016503	0.485294	0.766129	32	FALSE	35.2812	0.496919
YAB1	2.08081	0.013142	0.480583	0.776344	31	FALSE	34.8387	0.497696
E131	2.07071	0.062128	0.482927	0.71954	30	FALSE	29.9667	0.468229
ATB16	2.14141	0.026895	0.466981	0.751232	29	FALSE	30.8966	0.506501
TLP6	2.12121	0.005476	0.471429	0.82266	29	FALSE	37.2069	0.516762
Y4294	2.12121	0.030754	0.471429	0.746032	28	FALSE	29.2143	0.478923
Y1864	2.12121	0.030754	0.471429	0.746032	28	FALSE	29.2143	0.478923
COL14	2.12121	0.030754	0.471429	0.746032	28	FALSE	29.2143	0.478923
LYM1	2.13131	0.022242	0.469194	0.785714	28	FALSE	32	0.507937
ATL46	2.15151	0.020078	0.464789	0.767196	28	FALSE	30.6071	0.501756
GDIR	2.17172	0.030734	0.460465	0.735043	27	FALSE	28.3704	0.497726
HAT3	2.23232	0.043736	0.447964	0.72	26	FALSE	27.1154	0.511611
Y3037	2.18182	0.022947	0.458333	0.744615	26	FALSE	28	0.491228
E1313	2.36364	0.0385	0.423077	0.713768	24	FALSE	25.75	0.52551
TBL22	2.51515	0.063236	0.39759	0.662338	22	FALSE	22.3636	0.456401
E136	2.51515	0.063236	0.39759	0.662338	22	FALSE	22.3636	0.456401
BH067	2.50505	0.03429	0.399194	0.705628	22	FALSE	23.5	0.489583
PPR23	2.54546	0.022862	0.392857	0.72381	21	FALSE	23.3333	0.496454
UGPI7	2.54546	0.022862	0.392857	0.72381	21	FALSE	23.3333	0.496454
FBL14	2.53535	0.018351	0.394422	0.733333	21	FALSE	23.7143	0.515528
ROGF7	3.10101	0.039945	0.322476	0.642105	20	FALSE	18.6	0.502703
PLA15	3.17172	0.027522	0.315287	0.673684	20	FALSE	17.5	0.514706
ACR8	3.17172	0.027522	0.315287	0.673684	20	FALSE	17.5	0.514706
PCL1	3.17172	0.027522	0.315287	0.673684	20	FALSE	17.5	0.514706
Y4095	3.11111	0.026758	0.321429	0.666667	19	FALSE	19.1579	0.517781
C86A8	3.45454	0.023116	0.289474	0.719298	19	FALSE	16.3684	0.584586
EDL3	2.66667	0.016686	0.375	0.72549	18	FALSE	21.2222	0.471605
PBS1	3.62626	0.007325	0.275766	0.75817	18	FALSE	16.3889	0.606996
KN5D	2.75758	0.030216	0.362637	0.742647	17	FALSE	20.5294	0.456209
LVR	2.90909	0.021247	0.34375	0.735294	17	FALSE	20.0588	0.477591
CVIF2	3.13131	0.011401	0.319355	0.727941	17	FALSE	19.6471	0.531002
XERIC	3.86869	0.003284	0.258486	0.801471	17	FALSE	16.4118	0.631222
RNS7	3.87879	0.002155	0.257813	0.85	16	FALSE	16.4375	0.632212
HEVL	3.87879	0.002155	0.257813	0.85	16	FALSE	16.4375	0.632212
RD21B	3.89899	0.001171	0.256477	0.895238	15	FALSE	16.3333	0.653333
AGL30	3.89899	0.001171	0.256477	0.895238	15	FALSE	16.3333	0.653333
WAKLB	4.0101	0.000484	0.24937	0.934066	14	FALSE	16.1429	0.733766
PRU1	4.0101	0.000484	0.24937	0.934066	14	FALSE	16.1429	0.733766
BGA16	4.0101	0.000484	0.24937	0.934066	14	FALSE	16.1429	0.733766
SAU50	4.34343	0	0.230233	1	11	FALSE	15.3636	0.808612
FBL17	4.34343	0	0.230233	1	11	FALSE	15.3636	0.808612
Drought down-regulated leaf
Gene name	AverageShortestPathLength	BetweennessCentrality	ClosenessCentrality	ClusteringCoefficient	Degree	IsSingleNode	NeighborhoodConnectivity	TopologicalCoefficient
SMO11	1.23232	0.025425	0.811475	0.726235	81	FALSE	61.4691	0.653927
PYL6	1.24242	0.038656	0.804878	0.691772	80	FALSE	60.4875	0.643484
MYB36	1.25253	0.019473	0.798387	0.738291	80	FALSE	61.825	0.664785
ROC2	1.25253	0.019473	0.798387	0.738291	80	FALSE	61.825	0.664785
Y5780	1.25253	0.019473	0.798387	0.738291	80	FALSE	61.825	0.664785
PTR51	1.25253	0.019473	0.798387	0.738291	80	FALSE	61.825	0.664785
HEBP2	1.27273	0.015231	0.785714	0.761905	78	FALSE	62.4872	0.671905
USPAL	1.27273	0.015231	0.785714	0.761905	78	FALSE	62.4872	0.671905
NAC29	1.29293	0.011579	0.773438	0.787018	76	FALSE	63.1316	0.678834
DOX1	1.29293	0.011579	0.773438	0.787018	76	FALSE	63.1316	0.678834
SUT42	1.30303	0.009947	0.767442	0.8	75	FALSE	63.44	0.682151
BBX32	1.34343	0.007106	0.744361	0.827626	73	FALSE	64.0685	0.696397
AMYG	1.37374	0.004668	0.727941	0.857948	71	FALSE	64.7183	0.71119
EXL3	1.33333	0.029445	0.75	0.672878	70	FALSE	59.7429	0.628872
GH310	1.40404	0.003619	0.71223	0.87412	70	FALSE	65.0571	0.730979
HSP7C	1.40404	0.003619	0.71223	0.87412	70	FALSE	65.0571	0.730979
CDF1	1.40404	0.003619	0.71223	0.87412	70	FALSE	65.0571	0.730979
BEBT	1.40404	0.003619	0.71223	0.87412	70	FALSE	65.0571	0.730979
BAMO	1.35353	0.02602	0.738806	0.674276	68	FALSE	59.7059	0.628483
CRK25	1.42424	0.002269	0.702128	0.906058	68	FALSE	65.7059	0.738268
RER5	1.42424	0.002269	0.702128	0.906058	68	FALSE	65.7059	0.738268
CAR9	1.42424	0.002269	0.702128	0.906058	68	FALSE	65.7059	0.738268
AKT2	1.42424	0.002269	0.702128	0.906058	68	FALSE	65.7059	0.738268
HERC5	1.42424	0.002269	0.702128	0.906058	68	FALSE	65.7059	0.738268
IAA14	1.49495	0.000659	0.668919	0.954808	65	FALSE	66.5231	0.764633
CAO	1.49495	0.000659	0.668919	0.954808	65	FALSE	66.5231	0.764633
BAMS	1.49495	0.000659	0.668919	0.954808	65	FALSE	66.5231	0.764633
GOLS1	1.49495	0.000659	0.668919	0.954808	65	FALSE	66.5231	0.764633
AB22G	1.49495	0.000659	0.668919	0.954808	65	FALSE	66.5231	0.764633
WTR32	1.49495	0.000659	0.668919	0.954808	65	FALSE	66.5231	0.764633
IGS1	1.49495	0.000659	0.668919	0.954808	65	FALSE	66.5231	0.764633
SKI23	1.49495	0.000659	0.668919	0.954808	65	FALSE	66.5231	0.764633
PRR95	1.49495	0.000659	0.668919	0.954808	65	FALSE	66.5231	0.764633
CTPA3	1.52525	0.000397	0.655629	0.96875	64	FALSE	66.7031	0.775618
LNK1	1.52525	0.000397	0.655629	0.96875	64	FALSE	66.7031	0.775618
Y5224	1.52525	0.000397	0.655629	0.96875	64	FALSE	66.7031	0.775618
SMBP2	1.52525	0.000397	0.655629	0.96875	64	FALSE	66.7031	0.775618
PP395	1.52525	0.000397	0.655629	0.96875	64	FALSE	66.7031	0.775618
GLD27	1.52525	0.000397	0.655629	0.96875	64	FALSE	66.7031	0.775618
SBT17	1.53535	0.000232	0.651316	0.980543	63	FALSE	66.8095	0.776855
CADH1	1.53535	0.000232	0.651316	0.980543	63	FALSE	66.8095	0.776855
RBL9	1.53535	0.000232	0.651316	0.980543	63	FALSE	66.8095	0.776855
SAG21	1.53535	0.000232	0.651316	0.980543	63	FALSE	66.8095	0.776855
LNK2	1.53535	0.000232	0.651316	0.980543	63	FALSE	66.8095	0.776855
PSK	1.53535	0.000232	0.651316	0.980543	63	FALSE	66.8095	0.776855
LBP65	1.53535	0.000232	0.651316	0.980543	63	FALSE	66.8095	0.776855
GSTUH	1.54546	0.00012	0.647059	0.989424	62	FALSE	66.8064	0.776819
SNAK2	1.54546	0.00012	0.647059	0.989424	62	FALSE	66.8064	0.776819
GSTUG	1.42424	0.017779	0.702128	0.682514	61	FALSE	59.4426	0.625712
PSAD	1.58586	2.07e-05	0.630573	0.997814	61	FALSE	66.7705	0.794887
NANP	1.58586	2.07e-05	0.630573	0.997814	61	FALSE	66.7705	0.794887
MPK17	1.58586	2.07e-05	0.630573	0.997814	61	FALSE	66.7705	0.794887
P2C34	1.58586	2.07e-05	0.630573	0.997814	61	FALSE	66.7705	0.794887
SSY2	1.58586	2.07e-05	0.630573	0.997814	61	FALSE	66.7705	0.794887
CCD4	1.58586	2.07e-05	0.630573	0.997814	61	FALSE	66.7705	0.794887
CA4	1.58586	2.07e-05	0.630573	0.997814	61	FALSE	66.7705	0.794887
CB13	1.58586	2.07e-05	0.630573	0.997814	61	FALSE	66.7705	0.794887
CB24	1.58586	2.07e-05	0.630573	0.997814	61	FALSE	66.7705	0.794887
TSJT1	1.58586	2.07e-05	0.630573	0.997814	61	FALSE	66.7705	0.794887
CHLH	1.58586	2.07e-05	0.630573	0.997814	61	FALSE	66.7705	0.794887
SIGE	1.58586	2.07e-05	0.630573	0.997814	61	FALSE	66.7705	0.794887
YWKD	1.62626	0	0.614907	1	60	FALSE	66.5667	0.821811
ALFP2	1.62626	0	0.614907	1	60	FALSE	66.5667	0.821811
RCA2	1.62626	0	0.614907	1	60	FALSE	66.5667	0.821811
ADH1	1.62626	0	0.614907	1	60	FALSE	66.5667	0.821811
ZIP1	1.46465	0.018585	0.682759	0.686364	56	FALSE	58.5357	0.609747
VSPA	1.51515	0.013935	0.66	0.713435	49	FALSE	56.4082	0.575594
PIN5	1.51515	0.013935	0.66	0.713435	49	FALSE	56.4082	0.575594
P5CS	1.51515	0.013935	0.66	0.713435	49	FALSE	56.4082	0.575594
C7A15	1.56566	0.008628	0.63871	0.754757	44	FALSE	55.2045	0.563312
CAAT7	1.56566	0.008628	0.63871	0.754757	44	FALSE	55.2045	0.563312
MCA9	1.57576	0.015207	0.634615	0.759582	42	FALSE	50.2619	0.507696
U90A1	1.58586	0.011117	0.630573	0.765389	42	FALSE	51.4286	0.524781
PCP	1.58586	0.011117	0.630573	0.765389	42	FALSE	51.4286	0.524781
GLYR1	1.58586	0.010227	0.630573	0.767712	42	FALSE	52.5	0.535714
ASNS1	1.58586	0.013544	0.630573	0.769512	41	FALSE	49.6829	0.501848
SIRP1	1.59596	0.009916	0.626582	0.776829	41	FALSE	50.9268	0.519662
SNAK1	1.60606	0.01076	0.622642	0.790823	39	FALSE	48.3846	0.488733
JGB	1.60606	0.01076	0.622642	0.790823	39	FALSE	48.3846	0.488733
CRF5	1.62626	0.008367	0.614907	0.812312	37	FALSE	46.8378	0.473109
C76C1	1.62626	0.008367	0.614907	0.812312	37	FALSE	46.8378	0.473109
FDP	1.65657	0.008735	0.603659	0.832442	34	FALSE	42.1765	0.426025
PIF5	1.82828	0.012357	0.546961	0.820076	33	FALSE	39	0.46988
GPAT3	1.70707	0.005711	0.585799	0.846591	33	FALSE	41.0303	0.431898
P2	1.70707	0.005711	0.585799	0.846591	33	FALSE	41.0303	0.431898
C84A1	1.70707	0.005711	0.585799	0.846591	33	FALSE	41.0303	0.431898
CARP1	2.08081	0.016674	0.480583	0.747984	32	FALSE	33.3438	0.565148
P2B15	2.08081	0.016674	0.480583	0.747984	32	FALSE	33.3438	0.565148
WTR39	1.83838	0.003903	0.543956	0.856855	32	FALSE	39.8438	0.480045
TLP5	2	0.010166	0.5	0.806452	31	FALSE	35.5484	0.52277
GLR14	2.22222	0.007242	0.45	0.77208	27	FALSE	31	0.62
HMA2	2.22222	0.007242	0.45	0.77208	27	FALSE	31	0.62
EF106	2.24242	0.006362	0.445946	0.775385	26	FALSE	30.6154	0.624804
AHL1	2.27273	0.017847	0.44	0.735507	24	FALSE	28.2917	0.58941
FB76	2.42424	0.004454	0.4125	0.75817	18	FALSE	25	0.641026
BRXL2	2.65657	0.001055	0.376426	0.846154	13	FALSE	22.3077	0.602911
RLP1	2.84849	0.000589	0.351064	0.878788	12	FALSE	21.5	0.632353
Y1133	2.9596	0.000377	0.337884	0.909091	11	FALSE	20.7273	0.628099
MGDG2	2.9596	0.000377	0.337884	0.909091	11	FALSE	20.7273	0.628099
PHO1	3.21212	0	0.311321	1	6	FALSE	14.8333	0.618056
Drought up-regulated root
Gene name	AverageShortestPathLength	BetweennessCentrality	ClosenessCentrality	ClusteringCoefficient	Degree	IsSingleNode	NeighborhoodConnectivity	TopologicalCoefficient
LBD42	2.22222	0.094538	0.45	0.60582	28	FALSE	27.0357	0.450595
F6H1	2.26263	0.071444	0.441964	0.655172	30	FALSE	28.2333	0.470556
MLO6	2.27273	0.068279	0.44	0.632479	27	FALSE	28.7037	0.448495
CRR38	2.28283	0.067497	0.438053	0.696552	30	FALSE	32.0333	0.508466
ITN1	2.17172	0.058938	0.460465	0.721014	24	FALSE	25.9583	0.432639
EF112	2.27273	0.057655	0.44	0.667488	29	FALSE	27.0345	0.474289
OSL3	2.23232	0.045578	0.447964	0.67	25	FALSE	26.24	0.444746
CASL2	2.23232	0.045578	0.447964	0.67	25	FALSE	26.24	0.444746
ERF2	2.23232	0.042609	0.447964	0.726154	26	FALSE	26.5	0.449153
HEBP2	2.23232	0.042609	0.447964	0.726154	26	FALSE	26.5	0.449153
LEA29	2.38384	0.039756	0.419492	0.682266	29	FALSE	29.6552	0.511296
PTR47	2.20202	0.039549	0.454128	0.770751	23	FALSE	25.7826	0.444528
Y1648	2.18182	0.039198	0.458333	0.790514	23	FALSE	25.7826	0.436993
NO93	2.32323	0.038176	0.430435	0.726601	29	FALSE	32.3793	0.522247
ADO3	2.31313	0.03777	0.432314	0.672414	29	FALSE	28.8276	0.497027
CCD41	2.31313	0.037571	0.432314	0.669951	29	FALSE	28.4138	0.489893
EF114	2.32323	0.035648	0.430435	0.633846	26	FALSE	27.6154	0.476127
KCO1	2.30303	0.033084	0.434211	0.700855	27	FALSE	26.7778	0.478175
PSY	2.27273	0.032954	0.44	0.706522	24	FALSE	25.9167	0.462798
Y1561	2.32323	0.031079	0.430435	0.749425	30	FALSE	33.0333	0.54153
NLTP2	2.32323	0.031079	0.430435	0.749425	30	FALSE	33.0333	0.54153
LCMT1	2.49495	0.029281	0.40081	0.725806	32	FALSE	31.3125	0.559152
CML44	2.59596	0.029242	0.385214	0.74878	41	FALSE	32.4878	0.612977
INV1	2.65657	0.027235	0.376426	0.736508	36	FALSE	30.2778	0.582265
CARP1	2.65657	0.027235	0.376426	0.736508	36	FALSE	30.2778	0.582265
PER1	2.50505	0.025053	0.399194	0.72043	31	FALSE	31.1613	0.556452
DRE1D	2.50505	0.025053	0.399194	0.72043	31	FALSE	31.1613	0.556452
SUOX	2.60606	0.025008	0.383721	0.755128	40	FALSE	32.675	0.616509
C81E8	2.34343	0.023986	0.426724	0.695157	27	FALSE	27.2593	0.495623
DIOX5	2.50505	0.022918	0.399194	0.735484	31	FALSE	31.3871	0.560484
CLE1	2.43434	0.022535	0.410788	0.784946	31	FALSE	33.7742	0.572444
CASL1	2.43434	0.022535	0.410788	0.784946	31	FALSE	33.7742	0.572444
ASPRX	2.66667	0.022404	0.375	0.746218	35	FALSE	30.5143	0.586813
MTDH	2.27273	0.022184	0.44	0.771739	24	FALSE	26.1667	0.459064
ABR1	2.49495	0.021663	0.40081	0.786096	34	FALSE	33.7941	0.592879
CRK10	2.49495	0.021663	0.40081	0.786096	34	FALSE	33.7941	0.592879
BEE3	2.22222	0.020516	0.45	0.806324	23	FALSE	25.7391	0.476651
Y3272	2.22222	0.020516	0.45	0.806324	23	FALSE	25.7391	0.476651
VQ1	2.22222	0.020516	0.45	0.806324	23	FALSE	25.7391	0.476651
CAX3	2.49495	0.01989	0.40081	0.727513	28	FALSE	30.7143	0.538847
WRK27	2.60606	0.018759	0.383721	0.762097	32	FALSE	31.4375	0.571591
HSP83	2.60606	0.018297	0.383721	0.752016	32	FALSE	31.4688	0.572159
FP1V1	2.29293	0.017739	0.436123	0.802372	23	FALSE	25.7826	0.477456
WRK54	2.44444	0.016947	0.409091	0.780788	29	FALSE	33.3793	0.556322
ORG2	2.61616	0.015993	0.382239	0.784874	35	FALSE	33.6	0.622222
WTR31	2.73737	0.015102	0.365314	0.763025	35	FALSE	30.0857	0.601714
HFA6B	2.61616	0.014	0.382239	0.763441	31	FALSE	31.6129	0.57478
GL117	2.51515	0.013422	0.39759	0.810484	32	FALSE	34.0938	0.598136
PRR73	2.83838	0.012788	0.352313	0.769748	35	FALSE	29.8	0.620833
ASP	2.61616	0.012239	0.382239	0.776344	31	FALSE	31.6452	0.575367
CLE5	2.68687	0.010874	0.37218	0.769231	40	FALSE	32.65	0.666327
GL114	2.68687	0.010874	0.37218	0.769231	40	FALSE	32.65	0.666327
EF109	2.68687	0.010874	0.37218	0.769231	40	FALSE	32.65	0.666327
DNAJ	2.68687	0.010874	0.37218	0.769231	40	FALSE	32.65	0.666327
BT1	2.68687	0.010874	0.37218	0.769231	40	FALSE	32.65	0.666327
CLE6	2.68687	0.010874	0.37218	0.769231	40	FALSE	32.65	0.666327
HFB2A	2.68687	0.010874	0.37218	0.769231	40	FALSE	32.65	0.666327
DRE1F	2.26263	0.010866	0.441964	0.831169	22	FALSE	25.6364	0.493007
MIF2	2.70707	0.008316	0.369403	0.795699	31	FALSE	31.4839	0.605459
TAR4	2.53535	0.00733	0.394422	0.83908	30	FALSE	34.3667	0.602924
DH11	2.53535	0.00733	0.394422	0.83908	30	FALSE	34.3667	0.602924
NCS2	2.84849	0.006988	0.351064	0.784314	34	FALSE	30.1471	0.628064
ANR	2.9798	0.005536	0.335593	0.789661	34	FALSE	29.8529	0.663399
TAUE3	2.9798	0.005536	0.335593	0.789661	34	FALSE	29.8529	0.663399
Y3148	2.76768	0.005392	0.361314	0.798009	38	FALSE	32.8684	0.699328
GL113	2.76768	0.005392	0.361314	0.798009	38	FALSE	32.8684	0.699328
ERF92	3.0404	0.004061	0.328904	0.808712	33	FALSE	29.9394	0.680441
WAK2	3.0404	0.004061	0.328904	0.808712	33	FALSE	29.9394	0.680441
TYDC2	3.0404	0.004061	0.328904	0.808712	33	FALSE	29.9394	0.680441
DOGL4	3.0404	0.004061	0.328904	0.808712	33	FALSE	29.9394	0.680441
THIC	3.07071	0.002415	0.325658	0.83871	31	FALSE	29.9355	0.696174
21KD	2.93939	0.002076	0.340206	0.847059	35	FALSE	33.2286	0.738413
BT2	2.93939	0.002076	0.340206	0.847059	35	FALSE	33.2286	0.738413
XERIC	2.93939	0.002076	0.340206	0.847059	35	FALSE	33.2286	0.738413
XTH7	3.08081	0.001791	0.32459	0.855172	30	FALSE	29.9333	0.696124
C7A10	3.22222	0.001191	0.310345	0.871921	29	FALSE	29.8966	0.729184
RHA1A	3.07071	0.001035	0.325658	0.880682	33	FALSE	33.4242	0.777308
ACT	3.23232	0.000907	0.309375	0.888889	28	FALSE	29.8929	0.729094
SILD	3.09091	0.000585	0.323529	0.92043	31	FALSE	33.7097	0.783946
LAC15	3.09091	0.000585	0.323529	0.92043	31	FALSE	33.7097	0.783946
TMVRN	3.26263	0.000433	0.306502	0.926154	26	FALSE	29.8462	0.746154
PER10	3.10101	0.000398	0.322476	0.94023	30	FALSE	33.8	0.786047
PYL6	3.10101	0.000398	0.322476	0.94023	30	FALSE	33.8	0.786047
Y1675	3.38384	0.000242	0.295522	0.946667	25	FALSE	29.8	0.784211
CSCL2	3.39394	0.000141	0.294643	0.967391	24	FALSE	29.7917	0.783991
RBOHD	3.39394	0.000141	0.294643	0.967391	24	FALSE	29.7917	0.783991
RLP21	3.39394	0.000141	0.294643	0.967391	24	FALSE	29.7917	0.783991
DRL27	3.39394	0.000141	0.294643	0.967391	24	FALSE	29.7917	0.783991
PME54	3.40404	9.44e-05	0.293769	0.976285	23	FALSE	29.6087	0.779176
ACCO3	3.26263	8.79e-05	0.306502	0.978836	28	FALSE	33.8571	0.806122
HBL1	3.26263	8.79e-05	0.306502	0.978836	28	FALSE	33.8571	0.806122
FLS2	3.51515	2.37e-05	0.284483	0.990476	21	FALSE	29.0952	0.808201
SEOB	3.32323	7.93e-06	0.300912	0.997151	27	FALSE	33.8518	0.825655
RNS6	3.32323	7.93e-06	0.300912	0.997151	27	FALSE	33.8518	0.825655
RAP23	3.32323	7.93e-06	0.300912	0.997151	27	FALSE	33.8518	0.825655
PRU1	3.32323	7.93e-06	0.300912	0.997151	27	FALSE	33.8518	0.825655
BEV1E	3.32323	7.93e-06	0.300912	0.997151	27	FALSE	33.8518	0.825655
TLP	3.32323	7.93e-06	0.300912	0.997151	27	FALSE	33.8518	0.825655
C76C1	3.33333	0	0.3	1	26	FALSE	33.6538	0.820826
APG2	3.64647	0	0.274238	1	19	FALSE	28.6316	0.818045
Drought down-regulated root
Gene name	AverageShortestPathLength	BetweennessCentrality	ClosenessCentrality	ClusteringCoefficient	Degree	IsSingleNode	NeighborhoodConnectivity	TopologicalCoefficient
CDF1	1.49495	0.024787	0.668919	0.705844	56	FALSE	48.125	0.517473
PGR5	1.56566	0.011128	0.63871	0.768549	43	FALSE	51.2326	0.517501
AIR1	1.9899	0.000457	0.502538	0.94878	41	FALSE	45.6829	0.725126
EXLB1	2.0202	0.000201	0.495	0.97166	39	FALSE	45.3846	0.73201
PMEI7	1.49495	0.031033	0.668919	0.690236	55	FALSE	47.8	0.508511
C84A1	1.49495	0.024787	0.668919	0.705844	56	FALSE	48.125	0.517473
LNK2	1.49495	0.024787	0.668919	0.705844	56	FALSE	48.125	0.517473
P2C08	1.51515	0.022376	0.66	0.712338	56	FALSE	47.8036	0.525314
ERF61	1.55556	0.02197	0.642857	0.699335	58	FALSE	46.0862	0.542191
NCED5	1.55556	0.02197	0.642857	0.699335	58	FALSE	46.0862	0.542191
OLE16	1.56566	0.01971	0.63871	0.703634	57	FALSE	46.3158	0.544892
BBE8	1.56566	0.01971	0.63871	0.703634	57	FALSE	46.3158	0.544892
LEA3	1.54546	0.01701	0.647059	0.723906	55	FALSE	47.7091	0.536057
MET1	1.60606	0.015322	0.622642	0.72013	56	FALSE	45.9107	0.559887
GRXS9	1.60606	0.015322	0.622642	0.72013	56	FALSE	45.9107	0.559887
LOG1	1.64647	0.014792	0.607362	0.741558	56	FALSE	46.6964	0.598672
NSP2	1.67677	0.010456	0.596386	0.755556	55	FALSE	46.7818	0.61555
LTL1	1.67677	0.010456	0.596386	0.755556	55	FALSE	46.7818	0.61555
ALMTC	1.49495	0.029337	0.668919	0.689029	54	FALSE	48.3333	0.508772
RVE8	1.50505	0.028304	0.66443	0.688679	53	FALSE	48.8302	0.514002
BCAT2	1.51515	0.025799	0.66	0.693816	52	FALSE	49.0192	0.515992
TSPO	1.47475	0.024852	0.678082	0.699095	52	FALSE	50.4231	0.509324
LTI65	1.47475	0.024852	0.678082	0.699095	52	FALSE	50.4231	0.509324
NPH3	1.48485	0.021859	0.673469	0.702745	51	FALSE	51.1569	0.516736
AMYG	1.49495	0.019761	0.668919	0.70449	50	FALSE	52.02	0.525455
RD19B	1.49495	0.018982	0.668919	0.71102	50	FALSE	51.34	0.518586
AOS1	1.51515	0.01705	0.66	0.718085	48	FALSE	52.0208	0.525463
PP301	1.50505	0.016887	0.66443	0.715136	49	FALSE	52.1225	0.526489
21KD	1.50505	0.016887	0.66443	0.715136	49	FALSE	52.1225	0.526489
CB13	1.50505	0.016832	0.66443	0.715986	49	FALSE	52.0816	0.526077
DNJB6	1.50505	0.016832	0.66443	0.715986	49	FALSE	52.0816	0.526077
RTL3	1.50505	0.016758	0.66443	0.718537	49	FALSE	51.7143	0.522367
GDL9	1.50505	0.016758	0.66443	0.718537	49	FALSE	51.7143	0.522367
SEOB	1.60606	0.013528	0.622642	0.72061	53	FALSE	47.1698	0.554939
MFT	1.53535	0.013396	0.651316	0.737198	46	FALSE	52.0652	0.525911
PER28	1.54546	0.011812	0.647059	0.747475	45	FALSE	52.0667	0.525926
DTX48	1.65657	0.011294	0.603659	0.742138	54	FALSE	45.7778	0.579466
PIN5	1.56566	0.010026	0.63871	0.768549	43	FALSE	51.7907	0.523138
SLP1	1.69697	0.008763	0.589286	0.769392	54	FALSE	46.8704	0.624938
LOX1	1.69697	0.008763	0.589286	0.769392	54	FALSE	46.8704	0.624938
C82C4	1.69697	0.008763	0.589286	0.769392	54	FALSE	46.8704	0.624938
AB1K8	1.60606	0.008663	0.622642	0.769657	43	FALSE	50.907	0.535863
RBCX2	1.70707	0.008257	0.585799	0.766968	52	FALSE	45.6923	0.601215
PMEI4	1.70707	0.008257	0.585799	0.766968	52	FALSE	45.6923	0.601215
NCED1	1.70707	0.008257	0.585799	0.766968	52	FALSE	45.6923	0.601215
C3H2	1.70707	0.007673	0.585799	0.782293	53	FALSE	46.9245	0.62566
P2C51	1.71717	0.00664	0.582353	0.795626	52	FALSE	46.9615	0.626154
BQMT	1.71717	0.00664	0.582353	0.795626	52	FALSE	46.9615	0.626154
FMO1	1.73737	0.006162	0.575581	0.791837	50	FALSE	45.6	0.608
D27	1.73737	0.005692	0.575581	0.808627	51	FALSE	46.9608	0.634605
ALFP2	1.73737	0.005692	0.575581	0.808627	51	FALSE	46.9608	0.634605
F6H1	1.73737	0.005692	0.575581	0.808627	51	FALSE	46.9608	0.634605
INVA	1.75758	0.00429	0.568966	0.820035	48	FALSE	45.5	0.606667
UGTK5	1.78788	0.00354	0.559322	0.847518	48	FALSE	46.875	0.651042
HERC5	1.79798	0.003388	0.55618	0.835338	47	FALSE	45.4255	0.63091
LRK10	1.83838	0.002308	0.543956	0.878261	46	FALSE	46.8261	0.678639
UFOG5	1.83838	0.002308	0.543956	0.878261	46	FALSE	46.8261	0.678639
Y2608	1.83838	0.002308	0.543956	0.878261	46	FALSE	46.8261	0.678639
PPAF	1.88889	0.001463	0.529412	0.887949	44	FALSE	45.4318	0.688361
MADS6	1.86869	0.001456	0.535135	0.909091	44	FALSE	46.7727	0.687834
BH084	1.86869	0.001456	0.535135	0.909091	44	FALSE	46.7727	0.687834
LRKS7	1.87879	0.001098	0.532258	0.924695	43	FALSE	46.7209	0.687073
ATHB7	1.91919	0.001028	0.521053	0.908084	43	FALSE	45.5116	0.711119
PUB19	1.91919	0.001028	0.521053	0.908084	43	FALSE	45.5116	0.711119
DTX27	1.90909	0.000756	0.52381	0.940767	42	FALSE	46.6429	0.70671
RCA1	1.90909	0.000756	0.52381	0.940767	42	FALSE	46.6429	0.70671
PER44	1.90909	0.000756	0.52381	0.940767	42	FALSE	46.6429	0.70671
TRXF2	1.9798	0.000715	0.505102	0.927991	42	FALSE	45.5952	0.723734
ATL32	1.9899	0.000457	0.502538	0.94878	41	FALSE	45.6829	0.725126
LHY	1.9899	0.000457	0.502538	0.94878	41	FALSE	45.6829	0.725126
ALL2	1.9899	0.000457	0.502538	0.94878	41	FALSE	45.6829	0.725126
HKT1	1.9899	0.000457	0.502538	0.94878	41	FALSE	45.6829	0.725126
OFT37	1.9899	0.000457	0.502538	0.94878	41	FALSE	45.6829	0.725126
MES12	1.9899	0.000457	0.502538	0.94878	41	FALSE	45.6829	0.725126
CDF2	1.9899	0.000457	0.502538	0.94878	41	FALSE	45.6829	0.725126
RVE7	1.9899	0.000457	0.502538	0.94878	41	FALSE	45.6829	0.725126
PME6	2	0.000324	0.5	0.960256	40	FALSE	45.55	0.723016
NRX2	2.0404	0.000261	0.490099	0.970513	40	FALSE	46.425	0.761066
1A1C	2.0404	0.000261	0.490099	0.970513	40	FALSE	46.425	0.761066
PP379	2.0404	0.000261	0.490099	0.970513	40	FALSE	46.425	0.761066
DSC1	2.0404	0.000261	0.490099	0.970513	40	FALSE	46.425	0.761066
QWRF7	2.0404	0.000261	0.490099	0.970513	40	FALSE	46.425	0.761066
STR4	2.0404	0.000261	0.490099	0.970513	40	FALSE	46.425	0.761066
PGLR	2.0404	0.000261	0.490099	0.970513	40	FALSE	46.425	0.761066
RCA2	2.0404	0.000261	0.490099	0.970513	40	FALSE	46.425	0.761066
BH085	2.0404	0.000261	0.490099	0.970513	40	FALSE	46.425	0.761066
MY102	2.0202	0.000201	0.495	0.97166	39	FALSE	45.3846	0.73201
HIP24	2.0505	0.00011	0.487685	0.981508	38	FALSE	45.1842	0.740725
RPT3	2.0505	0.00011	0.487685	0.981508	38	FALSE	45.1842	0.740725
LEA13	2.10101	8.28e-05	0.475962	0.987988	37	FALSE	45.7297	0.762162
PTR7	2.18182	4.48e-05	0.458333	0.989489	37	FALSE	44.946	0.77493
P2C34	2.19192	1.21e-05	0.456221	0.996825	36	FALSE	44.75	0.771552
WAKLQ	2.19192	1.21e-05	0.456221	0.996825	36	FALSE	44.75	0.771552
PIP21	2.19192	1.21e-05	0.456221	0.996825	36	FALSE	44.75	0.771552
TIL	2.19192	1.21e-05	0.456221	0.996825	36	FALSE	44.75	0.771552
PTR19	2.29293	0	0.436123	1	35	FALSE	45.2286	0.807653
Y1457	2.29293	0	0.436123	1	35	FALSE	45.2286	0.807653
RHIE	2.29293	0	0.436123	1	35	FALSE	45.2286	0.807653
PHOT2	2.29293	0	0.436123	1	35	FALSE	45.2286	0.807653
NCRK	2.21212	0	0.452055	1	34	FALSE	44.0882	0.760142

## Sheet: S2B
Table S2B: Estimation of closeness connectivity, betweenness centrality (Cb), eccentricity and degree centrality (k) in salt
Salt up-regulated (leaf)
Gene name	AverageShortestPathLength	BetweennessCentrality	ClosenessCentrality	ClusteringCoefficient	Degree	IsSingleNode	NeighborhoodConnectivity	TopologicalCoefficient
AKR1	1.01031	0.00044	0.989796	0.979167	96	FALSE	94.0625	0.969716
LAC14	1.01031	0.00044	0.989796	0.979167	96	FALSE	94.0625	0.969716
PDR1	1.01031	0.00044	0.989796	0.979167	96	FALSE	94.0625	0.969716
DOX1	1.01031	0.00044	0.989796	0.979167	96	FALSE	94.0625	0.969716
EXLB1	1.01031	0.00044	0.989796	0.979167	96	FALSE	94.0625	0.969716
INV1	1.02062	0.00017	0.979798	0.990594	95	FALSE	94.6	0.975258
HSP70	1.02062	0.00017	0.979798	0.990594	95	FALSE	94.6	0.975258
GSTXA	1.03093	0	0.97	1	94	FALSE	95.0319	0.97971
TLP1	1.03093	0.007886	0.97	1	94	FALSE	95.0319	0.97971
NCS2	1.03093	0	0.97	1	94	FALSE	95.0319	0.97971
TLP	1.03093	0.007886	0.97	1	94	FALSE	95.0319	0.97971
ERD10	1.03093	0	0.97	1	94	FALSE	95.0319	0.97971
WRKY6	1	0.007886	1	0.959622	97	FALSE	93.1237	0.960038
2MMP	1	0.007886	1	0.959622	97	FALSE	93.1237	0.960038
GES	1.43299	0.00299	0.697842	0.958249	55	FALSE	93.2182	0.961012
DCS3	1.54639	0.002148	0.646667	0.957717	44	FALSE	93.0227	0.958997
MTDH	1.01031	0.00044	0.989796	0.979167	96	FALSE	94.0625	0.969716
7SB1	1.01031	0.00044	0.989796	0.979167	96	FALSE	94.0625	0.969716
U73C5	1.01031	0.00044	0.989796	0.979167	96	FALSE	94.0625	0.969716
3AT1	1.01031	0.00044	0.989796	0.979167	96	FALSE	94.0625	0.969716
NHL6	1.01031	0.00044	0.989796	0.979167	96	FALSE	94.0625	0.969716
BBE28	1.01031	0.00044	0.989796	0.979167	96	FALSE	94.0625	0.969716
PER73	1.01031	0.00044	0.989796	0.979167	96	FALSE	94.0625	0.969716
Y1648	1.01031	0.00044	0.989796	0.979167	96	FALSE	94.0625	0.969716
BH137	1.01031	0.00044	0.989796	0.979167	96	FALSE	94.0625	0.969716
ASNS1	1.01031	0.00044	0.989796	0.979167	96	FALSE	94.0625	0.969716
UGT1	1.01031	0.00044	0.989796	0.979167	96	FALSE	94.0625	0.969716
MASY	1.01031	0.00044	0.989796	0.979167	96	FALSE	94.0625	0.969716
DXS2	1.01031	0.00044	0.989796	0.979167	96	FALSE	94.0625	0.969716
CSCLD	1.01031	0.00044	0.989796	0.979167	96	FALSE	94.0625	0.969716
PHT17	1.01031	0.00044	0.989796	0.979167	96	FALSE	94.0625	0.969716
AB4B	1.01031	0.00044	0.989796	0.979167	96	FALSE	94.0625	0.969716
NFD4	1.01031	0.00044	0.989796	0.979167	96	FALSE	94.0625	0.969716
B561P	1.01031	0.00044	0.989796	0.979167	96	FALSE	94.0625	0.969716
ZIP5	1.01031	0.00044	0.989796	0.979167	96	FALSE	94.0625	0.969716
CP1	1.01031	0.00044	0.989796	0.979167	96	FALSE	94.0625	0.969716
BEV1A	1.01031	0.00044	0.989796	0.979167	96	FALSE	94.0625	0.969716
MLO6	1.01031	0.00044	0.989796	0.979167	96	FALSE	94.0625	0.969716
HSF24	1.01031	0.00044	0.989796	0.979167	96	FALSE	94.0625	0.969716
MPK3	1.01031	0.00044	0.989796	0.979167	96	FALSE	94.0625	0.969716
SLAH3	1.01031	0.00044	0.989796	0.979167	96	FALSE	94.0625	0.969716
CLPD	1.01031	0.00044	0.989796	0.979167	96	FALSE	94.0625	0.969716
NDB2	1.01031	0.00044	0.989796	0.979167	96	FALSE	94.0625	0.969716
LERK4	1.01031	0.00044	0.989796	0.979167	96	FALSE	94.0625	0.969716
ACCO3	1.01031	0.00044	0.989796	0.979167	96	FALSE	94.0625	0.969716
DTX40	1.01031	0.00044	0.989796	0.979167	96	FALSE	94.0625	0.969716
ELIP1	1.01031	0.00044	0.989796	0.979167	96	FALSE	94.0625	0.969716
PTR7	1.01031	0.00044	0.989796	0.979167	96	FALSE	94.0625	0.969716
Y5566	1.01031	0.00044	0.989796	0.979167	96	FALSE	94.0625	0.969716
EXTN3	1.01031	0.00044	0.989796	0.979167	96	FALSE	94.0625	0.969716
RLK7	1.01031	0.00044	0.989796	0.979167	96	FALSE	94.0625	0.969716
GST23	1.02062	0.00017	0.979798	0.990594	95	FALSE	94.6	0.975258
PRU1	1.02062	0.00017	0.979798	0.990594	95	FALSE	94.6	0.975258
SCGT	1.02062	0.00017	0.979798	0.990594	95	FALSE	94.6	0.975258
CHI5	1.02062	0.00017	0.979798	0.990594	95	FALSE	94.6	0.975258
E13B	1.02062	0.00017	0.979798	0.990594	95	FALSE	94.6	0.975258
MEE14	1.02062	0.00017	0.979798	0.990594	95	FALSE	94.6	0.975258
GLIP1	1.02062	0.00017	0.979798	0.990594	95	FALSE	94.6	0.975258
UFOG6	1.02062	0.00017	0.979798	0.990594	95	FALSE	94.6	0.975258
CIPK7	1.02062	0.00017	0.979798	0.990594	95	FALSE	94.6	0.975258
7SBG2	1.03093	0	0.97	1	94	FALSE	95.0319	0.97971
RD22	1.03093	0	0.97	1	94	FALSE	95.0319	0.97971
CHIB	1.03093	0	0.97	1	94	FALSE	95.0319	0.97971
YLS3	1.03093	0	0.97	1	94	FALSE	95.0319	0.97971
SILD	1.03093	0	0.97	1	94	FALSE	95.0319	0.97971
GSTZ	1.03093	0	0.97	1	94	FALSE	95.0319	0.97971
12KD	1.03093	0	0.97	1	94	FALSE	95.0319	0.97971
RNS1	1.03093	0	0.97	1	94	FALSE	95.0319	0.97971
2NPD	1.03093	0	0.97	1	94	FALSE	95.0319	0.97971
AL2B4	1.03093	0	0.97	1	94	FALSE	95.0319	0.97971
NLTP2	1.03093	0	0.97	1	94	FALSE	95.0319	0.97971
PTR14	1.03093	0	0.97	1	94	FALSE	95.0319	0.97971
C7A22	1.03093	0	0.97	1	94	FALSE	95.0319	0.97971
CYPH	1.03093	0	0.97	1	94	FALSE	95.0319	0.97971
STP13	1.03093	0	0.97	1	94	FALSE	95.0319	0.97971
NFH	1.03093	0	0.97	1	94	FALSE	95.0319	0.97971
Y8948	1.03093	0	0.97	1	94	FALSE	95.0319	0.97971
BSP	1.03093	0	0.97	1	94	FALSE	95.0319	0.97971
C7A12	1.03093	0	0.97	1	94	FALSE	95.0319	0.97971
PER52	1.03093	0	0.97	1	94	FALSE	95.0319	0.97971
AKR2	1.03093	0	0.97	1	94	FALSE	95.0319	0.97971
PRS2	1.03093	0	0.97	1	94	FALSE	95.0319	0.97971
C7A15	1.03093	0	0.97	1	94	FALSE	95.0319	0.97971
NAC72	1.03093	0	0.97	1	94	FALSE	95.0319	0.97971
BOR4	1.03093	0	0.97	1	94	FALSE	95.0319	0.97971
JMT	1.03093	0	0.97	1	94	FALSE	95.0319	0.97971
CHIT2	1.03093	0	0.97	1	94	FALSE	95.0319	0.97971
COMT1	1.03093	0	0.97	1	94	FALSE	95.0319	0.97971
ZIFL1	1.03093	0	0.97	1	94	FALSE	95.0319	0.97971
APA1	1.03093	0	0.97	1	94	FALSE	95.0319	0.97971
WRK15	1.03093	0	0.97	1	94	FALSE	95.0319	0.97971
C81D1	1.03093	0	0.97	1	94	FALSE	95.0319	0.97971
SGMR2	1.03093	0	0.97	1	94	FALSE	95.0319	0.97971
EF113	1.03093	0	0.97	1	94	FALSE	95.0319	0.97971
PER4	1.03093	0	0.97	1	94	FALSE	95.0319	0.97971
C81E8	1.03093	0	0.97	1	94	FALSE	95.0319	0.97971
AIFA	1.03093	0	0.97	1	94	FALSE	95.0319	0.97971
AB3C	1.95876	0	0.510526	1	4	FALSE	73.25	0.755155
Salt down-regulated leaf
Gene name	AverageShortestPathLength	BetweennessCentrality	ClosenessCentrality	ClusteringCoefficient	Degree	IsSingleNode	NeighborhoodConnectivity	TopologicalCoefficient
GDL79	1	0	1	1	18	FALSE	8	1
CAX3	1	0	1	1	9	FALSE	8	1
DRPE	1	0	1	1	9	FALSE	8	1
PDF1	1	0	1	1	9	FALSE	8	1
JI23	1	0	1	1	9	FALSE	8	1
XTH6	1	0	1	1	9	FALSE	8	1
FLA2	1	0	1	1	9	FALSE	8	1
GL31	1	0	1	1	9	FALSE	8	1
ERLL1	1	0	1	1	9	FALSE	8	1
Salt up-regulated root
Gene name	AverageShortestPathLength	BetweennessCentrality	ClosenessCentrality	ClusteringCoefficient	Degree	IsSingleNode	NeighborhoodConnectivity	TopologicalCoefficient
U71K2	2.57576	0.070852	0.388235	0.688889	10	FALSE	17.4	0.54375
ADO3	3.13131	0.068821	0.319355	0.466667	6	FALSE	9.5	0.452381
Y3028	3.43434	0.046735	0.291176	0.6	6	FALSE	6.83333	0.427083
DRE1D	1.60606	0.045383	0.622642	0.739592	50	FALSE	67.1	0.729348
PER1	2.30303	0.039041	0.434211	0.824176	14	FALSE	24.5	0.445455
ERDL8	2.30303	0.039041	0.434211	0.824176	14	FALSE	24.5	0.445455
XTH7	4.0202	0.026591	0.248744	0.666667	7	FALSE	5.57143	0.557143
MTDH	1.81818	0.025193	0.55	0.796923	26	FALSE	54.2308	0.583127
PLP2	1.29293	0.021816	0.773437	0.812312	86	FALSE	72	0.791209
WRKY6	1.31313	0.020294	0.761538	0.811819	84	FALSE	72	0.791209
M3K17	1.31313	0.020294	0.761538	0.811819	84	FALSE	72	0.791209
ASP	1.83838	0.019701	0.543956	0.818841	24	FALSE	51.9167	0.558244
RHC2A	1.83838	0.019701	0.543956	0.818841	24	FALSE	51.9167	0.558244
ELF4	1.28283	0.018944	0.779528	0.827052	87	FALSE	72.5862	0.797651
TLP	1.28283	0.018944	0.779528	0.827052	87	FALSE	72.5862	0.797651
NAC83	1.36364	0.017827	0.733333	0.808179	79	FALSE	71.8734	0.789818
EXLB1	1.30303	0.017415	0.767442	0.827731	85	FALSE	72.6471	0.798319
BH025	1.43434	0.014805	0.697183	0.801643	72	FALSE	71.5694	0.786477
GSTXA	1.75758	0.01475	0.568966	0.766387	35	FALSE	62.8571	0.68323
BBE26	1.86869	0.013612	0.535135	0.847619	21	FALSE	47.3333	0.508961
DNJB8	1.86869	0.013612	0.535135	0.847619	21	FALSE	47.3333	0.508961
IST1L	1.30303	0.01222	0.767442	0.857983	85	FALSE	73.8235	0.811248
AATP1	1.30303	0.01222	0.767442	0.857983	85	FALSE	73.8235	0.811248
PER53	1.30303	0.01222	0.767442	0.857983	85	FALSE	73.8235	0.811248
SAG12	1.78788	0.01092	0.559322	0.78629	32	FALSE	61.4375	0.667799
HFA6B	4.0303	0.009974	0.24812	0.733333	6	FALSE	6	0.6
PRF1	1.79798	0.009919	0.55618	0.793548	31	FALSE	60.871	0.661641
SRC2	1.79798	0.009919	0.55618	0.793548	31	FALSE	60.871	0.661641
CRR38	1.91919	0.008245	0.521053	0.869281	18	FALSE	41	0.450549
EF109	1.32323	0.006739	0.755725	0.890391	83	FALSE	75.0482	0.824705
BH126	1.32323	0.006739	0.755725	0.890391	83	FALSE	75.0482	0.824705
MASY	1.37374	0.004228	0.727941	0.907257	82	FALSE	75.6585	0.84065
EIX2	1.37374	0.004228	0.727941	0.907257	82	FALSE	75.6585	0.84065
GGP5	1.37374	0.004228	0.727941	0.907257	82	FALSE	75.6585	0.84065
CXE6	1.37374	0.004228	0.727941	0.907257	82	FALSE	75.6585	0.84065
DXS2	1.37374	0.004228	0.727941	0.907257	82	FALSE	75.6585	0.84065
NIMI1	1.37374	0.004228	0.727941	0.907257	82	FALSE	75.6585	0.84065
LAC7	1.39394	0.002337	0.717391	0.939873	80	FALSE	76.8	0.853333
AVT1I	4.35353	0.002268	0.229698	0.8	6	FALSE	5.66667	0.708333
KCS6	4.35353	0.002268	0.229698	0.8	6	FALSE	5.66667	0.708333
NLTP2	1.40404	0.001434	0.71223	0.957157	79	FALSE	77.3798	0.859775
DCS2	1.40404	0.001434	0.71223	0.957157	79	FALSE	77.3798	0.859775
YODA	1.40404	0.001434	0.71223	0.957157	79	FALSE	77.3798	0.859775
GPAT3	1.41414	0.000638	0.707143	0.974359	78	FALSE	77.9359	0.865954
ATHB7	1.41414	0.000638	0.707143	0.974359	78	FALSE	77.9359	0.865954
BBE18	1.41414	0.000638	0.707143	0.974359	78	FALSE	77.9359	0.865954
NOI4	1.41414	0.000638	0.707143	0.974359	78	FALSE	77.9359	0.865954
ALP1	1.41414	0.000638	0.707143	0.974359	78	FALSE	77.9359	0.865954
WRK40	1.41414	0.000638	0.707143	0.974359	78	FALSE	77.9359	0.865954
AB22G	1.41414	0.000638	0.707143	0.974359	78	FALSE	77.9359	0.865954
NO93	1.41414	0.000638	0.707143	0.974359	78	FALSE	77.9359	0.865954
ALPL	1.41414	0.000638	0.707143	0.974359	78	FALSE	77.9359	0.865954
P4H9	1.41414	0.000638	0.707143	0.974359	78	FALSE	77.9359	0.865954
CIGR1	1.41414	0.000638	0.707143	0.974359	78	FALSE	77.9359	0.865954
OXI1	1.41414	0.000638	0.707143	0.974359	78	FALSE	77.9359	0.865954
MYB4	1.41414	0.000638	0.707143	0.974359	78	FALSE	77.9359	0.865954
DIOX3	1.41414	0.000638	0.707143	0.974359	78	FALSE	77.9359	0.865954
GAPN	1.41414	0.000638	0.707143	0.974359	78	FALSE	77.9359	0.865954
SIRP1	1.49495	0.000124	0.668919	0.987355	77	FALSE	78.3117	0.889906
C94C1	1.49495	0.000124	0.668919	0.987355	77	FALSE	78.3117	0.889906
VQ29	1.49495	0.000124	0.668919	0.987355	77	FALSE	78.3117	0.889906
DIOX5	1.49495	0.000124	0.668919	0.987355	77	FALSE	78.3117	0.889906
P2C08	1.49495	0.000124	0.668919	0.987355	77	FALSE	78.3117	0.889906
CP1	1.49495	0.000124	0.668919	0.987355	77	FALSE	78.3117	0.889906
DIR4	1.49495	0.000124	0.668919	0.987355	77	FALSE	78.3117	0.889906
CHI5	1.49495	0.000124	0.668919	0.987355	77	FALSE	78.3117	0.889906
HFB2A	1.49495	0.000124	0.668919	0.987355	77	FALSE	78.3117	0.889906
NC104	1.49495	0.000124	0.668919	0.987355	77	FALSE	78.3117	0.889906
COL13	1.49495	0.000124	0.668919	0.987355	77	FALSE	78.3117	0.889906
IF1A	1.49495	0.000124	0.668919	0.987355	77	FALSE	78.3117	0.889906
9DC3	1.49495	0.000124	0.668919	0.987355	77	FALSE	78.3117	0.889906
BON3	1.49495	0.000124	0.668919	0.987355	77	FALSE	78.3117	0.889906
BH092	1.49495	0.000124	0.668919	0.987355	77	FALSE	78.3117	0.889906
AB3C	1.49495	0.000124	0.668919	0.987355	77	FALSE	78.3117	0.889906
PPSP2	1.49495	0.000124	0.668919	0.987355	77	FALSE	78.3117	0.889906
STR15	1.49495	0.000124	0.668919	0.987355	77	FALSE	78.3117	0.889906
TIF9	1.49495	0.000124	0.668919	0.987355	77	FALSE	78.3117	0.889906
ADH1	1.49495	0.000124	0.668919	0.987355	77	FALSE	78.3117	0.889906
ZAT10	1.49495	0.000124	0.668919	0.987355	77	FALSE	78.3117	0.889906
RHA1B	1.49495	0.000124	0.668919	0.987355	77	FALSE	78.3117	0.889906
JGB	1.49495	0.000124	0.668919	0.987355	77	FALSE	78.3117	0.889906
UGT1	1.49495	0.000124	0.668919	0.987355	77	FALSE	78.3117	0.889906
COMT1	1.50505	6.77e-05	0.66443	0.992632	76	FALSE	78.4079	0.890999
U73C5	1.50505	6.77e-05	0.66443	0.992632	76	FALSE	78.4079	0.890999
XERIC	1.50505	6.77e-05	0.66443	0.992632	76	FALSE	78.4079	0.890999
GST23	1.50505	6.77e-05	0.66443	0.992632	76	FALSE	78.4079	0.890999
B561P	1.50505	6.77e-05	0.66443	0.992632	76	FALSE	78.4079	0.890999
STAR7	1.50505	6.77e-05	0.66443	0.992632	76	FALSE	78.4079	0.890999
DCS3	1.50505	6.77e-05	0.66443	0.992632	76	FALSE	78.4079	0.890999
CLE1	4.9697	5.15e-05	0.20122	0.9	5	FALSE	5.8	0.828571
ROMT	1.51515	3.85e-05	0.66	0.995676	75	FALSE	78.4133	0.891061
GL113	1.51515	3.85e-05	0.66	0.995676	75	FALSE	78.4133	0.891061
BEV1A	1.51515	3.85e-05	0.66	0.995676	75	FALSE	78.4133	0.891061
ERF92	1.51515	3.85e-05	0.66	0.995676	75	FALSE	78.4133	0.891061
LOX31	1.51515	3.85e-05	0.66	0.995676	75	FALSE	78.4133	0.891061
AOC	1.53535	1.27e-05	0.651316	0.998478	73	FALSE	78.2877	0.889633
HBL1	1.53535	1.27e-05	0.651316	0.998478	73	FALSE	78.2877	0.889633
PRS2	1.56566	0	0.63871	1	71	FALSE	78.1127	0.897847
ASNS1	1.56566	0	0.63871	1	71	FALSE	78.1127	0.897847
APG2	4.9798	0	0.200811	1	4	FALSE	6	0.857143
Salt down-regulated root
Gene name	AverageShortestPathLength	BetweennessCentrality	ClosenessCentrality	ClusteringCoefficient	Degree	IsSingleNode	NeighborhoodConnectivity	TopologicalCoefficient
ATHB7	1.53535	0.001095	0.651316	0.922034	60	FALSE	61.45	0.722941
PER1	1.66667	0.000122	0.6	0.983165	55	FALSE	61.6727	0.770909
OLE16	1.22222	0.041127	0.818182	0.681013	80	FALSE	57.325	0.597135
XTHB	1.23232	0.03825	0.811475	0.681921	79	FALSE	57.4051	0.597969
P2C08	1.55556	0.026726	0.642857	0.723044	44	FALSE	44.5227	0.449725
ATL32	1.38384	0.024505	0.722628	0.692896	61	FALSE	57.459	0.580394
CDF1	1.33333	0.020647	0.75	0.697357	69	FALSE	58.1884	0.606129
EXPA7	1.56566	0.018797	0.63871	0.740864	43	FALSE	45.1395	0.455955
GOLS2	1.35353	0.017988	0.738806	0.702397	67	FALSE	58.3433	0.607743
SNAK2	1.80808	0.017728	0.553073	0.702671	42	FALSE	39.4762	0.519424
CAO	1.77778	0.01713	0.5625	0.711963	42	FALSE	40.5238	0.51296
BBX19	1.39394	0.016913	0.717391	0.709605	60	FALSE	58.1167	0.587037
FAB1D	1.31313	0.016174	0.761538	0.73045	75	FALSE	58.4267	0.635072
NCED5	1.31313	0.016174	0.761538	0.73045	75	FALSE	58.4267	0.635072
NRT21	1.39394	0.014908	0.717391	0.716393	61	FALSE	58.5574	0.597524
NPH3	1.45454	0.013919	0.6875	0.726765	54	FALSE	56.8518	0.574261
CAS2	1.32323	0.013795	0.755725	0.741577	74	FALSE	58.6622	0.637632
ERF61	1.32323	0.013795	0.755725	0.741577	74	FALSE	58.6622	0.637632
PME41	1.55556	0.013211	0.642857	0.762156	44	FALSE	49.4545	0.499541
MIP1B	1.40404	0.013115	0.71223	0.720631	59	FALSE	58.4407	0.59031
PER28	1.40404	0.013115	0.71223	0.720631	59	FALSE	58.4407	0.59031
COL12	1.82828	0.012856	0.546961	0.715385	40	FALSE	38.55	0.507237
ORG2	1.55556	0.011147	0.642857	0.774841	44	FALSE	51.5	0.520202
MFT	1.47475	0.01097	0.678082	0.742836	52	FALSE	56.7308	0.573038
AB19B	1.84848	0.010653	0.540984	0.721997	39	FALSE	38.0256	0.507009
ALMT8	1.84848	0.010653	0.540984	0.721997	39	FALSE	38.0256	0.507009
CB13	1.56566	0.010115	0.63871	0.779623	43	FALSE	50.0465	0.50552
21KD	1.56566	0.010115	0.63871	0.779623	43	FALSE	50.0465	0.50552
PIN5	1.48485	0.009818	0.673469	0.751373	51	FALSE	56.6471	0.572193
PP301	1.48485	0.009818	0.673469	0.751373	51	FALSE	56.6471	0.572193
MYC4	1.48485	0.009818	0.673469	0.751373	51	FALSE	56.6471	0.572193
XTH6	1.57576	0.009776	0.634615	0.780488	42	FALSE	48.3333	0.488215
DRPE	1.58586	0.009437	0.630573	0.780488	41	FALSE	46.4146	0.468835
EPFL1	1.58586	0.009437	0.630573	0.780488	41	FALSE	46.4146	0.468835
SWET7	1.49495	0.009044	0.668919	0.758367	50	FALSE	56.5	0.570707
STR4	1.93939	0.008793	0.515625	0.726885	38	FALSE	37.4474	0.558916
INVA	1.50505	0.008338	0.66443	0.765306	49	FALSE	56.3265	0.568955
GDL14	1.55556	0.00833	0.642857	0.789641	44	FALSE	53.4091	0.539486
RBCX2	1.37374	0.008238	0.727941	0.777062	71	FALSE	59.3521	0.659468
RNS1	1.37374	0.008238	0.727941	0.777062	71	FALSE	59.3521	0.659468
SOT16	1.53535	0.008018	0.651316	0.780676	46	FALSE	54.913	0.554677
PER60	1.53535	0.008018	0.651316	0.780676	46	FALSE	54.913	0.554677
PMGT2	1.40404	0.00684	0.71223	0.789648	70	FALSE	59.5857	0.67711
VITH4	1.40404	0.00684	0.71223	0.789648	70	FALSE	59.5857	0.67711
XTH23	1.59596	0.006695	0.626582	0.801282	40	FALSE	47.05	0.475253
UVR8	1.42424	0.005854	0.702128	0.802217	69	FALSE	59.8261	0.687656
PRP3	1.42424	0.005854	0.702128	0.802217	69	FALSE	59.8261	0.687656
PRP1	1.42424	0.005854	0.702128	0.802217	69	FALSE	59.8261	0.687656
SILD	1.45454	0.004395	0.6875	0.827227	67	FALSE	60.2687	0.700798
HERC5	1.45454	0.004395	0.6875	0.827227	67	FALSE	60.2687	0.700798
PLP2	1.45454	0.004395	0.6875	0.827227	67	FALSE	60.2687	0.700798
TPPD	1.45454	0.004395	0.6875	0.827227	67	FALSE	60.2687	0.700798
Y5986	1.46465	0.003874	0.682759	0.839161	66	FALSE	60.4545	0.70296
ERLL2	1.47475	0.003377	0.678082	0.851442	65	FALSE	60.6308	0.705009
ERF17	2.10101	0.003169	0.475962	0.782796	31	FALSE	34.5806	0.596218
BQMT	2.15151	0.002116	0.464789	0.810345	29	FALSE	33.8621	0.615674
U89C1	1.50505	0.001958	0.66443	0.892121	62	FALSE	61.1452	0.71099
PLA1	2.18182	0.00171	0.458333	0.825397	28	FALSE	33.5357	0.632749
KNAP2	2.18182	0.00171	0.458333	0.825397	28	FALSE	33.5357	0.632749
RVE8	1.51515	0.001507	0.66	0.907104	61	FALSE	61.3115	0.712924
PPAF	1.51515	0.001507	0.66	0.907104	61	FALSE	61.3115	0.712924
MY102	2.21212	0.001411	0.452055	0.837607	27	FALSE	33.1852	0.65069
BZP43	1.53535	0.001095	0.651316	0.922034	60	FALSE	61.45	0.722941
ABAH3	1.53535	0.001095	0.651316	0.922034	60	FALSE	61.45	0.722941
TRXF2	1.53535	0.001095	0.651316	0.922034	60	FALSE	61.45	0.722941
14KD	1.53535	0.001095	0.651316	0.922034	60	FALSE	61.45	0.722941
NRAM5	1.53535	0.001095	0.651316	0.922034	60	FALSE	61.45	0.722941
PME7	1.53535	0.001095	0.651316	0.922034	60	FALSE	61.45	0.722941
OHP1	1.53535	0.001095	0.651316	0.922034	60	FALSE	61.45	0.722941
RCA1	2.23232	0.00095	0.447964	0.863333	25	FALSE	32.48	0.636863
SUT2	1.56566	0.000827	0.63871	0.933372	59	FALSE	61.4746	0.740658
WSD1	2.30303	0.00042	0.434211	0.91342	22	FALSE	31.3182	0.666344
CDF2	1.62626	0.000256	0.614907	0.970779	56	FALSE	61.6429	0.761023
GUX2	1.62626	0.000256	0.614907	0.970779	56	FALSE	61.6429	0.761023
WTR11	1.62626	0.000256	0.614907	0.970779	56	FALSE	61.6429	0.761023
DTX27	2.32323	0.000173	0.430435	0.957895	20	FALSE	30.45	0.647872
SR1P1	2.32323	0.000173	0.430435	0.957895	20	FALSE	30.45	0.647872
C93A1	1.66667	0.000122	0.6	0.983165	55	FALSE	61.6727	0.770909
C7A22	1.66667	0.000122	0.6	0.983165	55	FALSE	61.6727	0.770909
PIP22	1.66667	0.000122	0.6	0.983165	55	FALSE	61.6727	0.770909
C04C1	1.66667	0.000122	0.6	0.983165	55	FALSE	61.6727	0.770909
AIR1	1.66667	0.000122	0.6	0.983165	55	FALSE	61.6727	0.770909
GLNA	1.66667	0.000122	0.6	0.983165	55	FALSE	61.6727	0.770909
GUN5	2.33333	8.54e-05	0.428571	0.976608	19	FALSE	29.8421	0.634938
MTEF9	1.67677	5.68e-05	0.596386	0.991614	54	FALSE	61.5926	0.769907
RVE7	1.67677	5.68e-05	0.596386	0.991614	54	FALSE	61.5926	0.769907
PAO5	2.58586	1.35e-05	0.386719	0.993464	18	FALSE	29.1111	0.677003
LTI65	2.58586	1.35e-05	0.386719	0.993464	18	FALSE	29.1111	0.677003
LHY	1.68687	3.96e-06	0.592814	0.999274	53	FALSE	61.4717	0.768396
HEBP2	1.68687	3.96e-06	0.592814	0.999274	53	FALSE	61.4717	0.768396
RPT3	1.68687	3.96e-06	0.592814	0.999274	53	FALSE	61.4717	0.768396
TIL	1.68687	3.96e-06	0.592814	0.999274	53	FALSE	61.4717	0.768396
PIP2	1.68687	3.96e-06	0.592814	0.999274	53	FALSE	61.4717	0.768396
TIP41	1.68687	3.96e-06	0.592814	0.999274	53	FALSE	61.4717	0.768396
CRSP	1.68687	3.96e-06	0.592814	0.999274	53	FALSE	61.4717	0.768396
PTR7	1.68687	3.96e-06	0.592814	0.999274	53	FALSE	61.4717	0.768396
44476	1.68687	3.96e-06	0.592814	0.999274	53	FALSE	61.4717	0.768396
P2C34	1.68687	3.96e-06	0.592814	0.999274	53	FALSE	61.4717	0.768396
AOP1L	1.69697	0	0.589286	1	52	FALSE	61.1538	0.764423
QWRF7	2.63636	0	0.37931	1	17	FALSE	28.4118	0.676471
Salt up-regulated seed
Gene name	AverageShortestPathLength	BetweennessCentrality	ClosenessCentrality	ClusteringCoefficient	Degree	IsSingleNode	NeighborhoodConnectivity	TopologicalCoefficient
YE7A	1	0	1	1	26	FALSE	26	1
YO059	1	0	1	1	26	FALSE	26	1
Y1561	1	0	1	1	26	FALSE	26	1
UFAA1	1	0	1	1	26	FALSE	26	1
THLP1	1	0	1	1	26	FALSE	26	1
SILD	1	0	1	1	26	FALSE	26	1
SGMR2	1	0	1	1	26	FALSE	26	1
RBOHB	1	0	1	1	26	FALSE	26	1
RAV1	1	0	1	1	26	FALSE	26	1
PRS2	1	0	1	1	26	FALSE	26	1
PRF1	1	0	1	1	26	FALSE	26	1
PER42	1	0	1	1	26	FALSE	26	1
PER30	1	0	1	1	26	FALSE	26	1
MDH	1	0	1	1	26	FALSE	26	1
INV1	1	0	1	1	26	FALSE	26	1
HMDH2	1	0	1	1	26	FALSE	26	1
GDAP2	1	0	1	1	26	FALSE	26	1
GAO1B	1	0	1	1	26	FALSE	26	1
E133	1	0	1	1	26	FALSE	26	1
CSCL1	1	0	1	1	26	FALSE	26	1
CIPK6	1	0	1	1	26	FALSE	26	1
C82A3	1	0	1	1	26	FALSE	26	1
C71DA	1	0	1	1	26	FALSE	26	1
ACEA	1	0	1	1	26	FALSE	26	1
AB14G	1	0	1	1	26	FALSE	26	1
AB10C	1	0	1	1	26	FALSE	26	1
21KD	1	0	1	1	26	FALSE	26	1
Salt down-regulated seed
Gene name	AverageShortestPathLength	BetweennessCentrality	ClosenessCentrality	ClusteringCoefficient	Degree	IsSingleNode	NeighborhoodConnectivity	TopologicalCoefficient
XTH23	1	0	1	1	73	FALSE	73	1
Y273	1	0	1	1	73	FALSE	73	1
XTH22	1	0	1	1	73	FALSE	73	1
XTH2	1	0	1	1	73	FALSE	73	1
VCLA	1	0	1	1	73	FALSE	73	1
VCL22	1	0	1	1	73	FALSE	73	1
UGT2	1	0	1	1	73	FALSE	73	1
UGPI4	1	0	1	1	73	FALSE	73	1
TSJT1	1	0	1	1	73	FALSE	73	1
TPRL1	1	0	1	1	73	FALSE	73	1
TMK4	1	0	1	1	73	FALSE	73	1
TM205	1	0	1	1	73	FALSE	73	1
TENAE	1	0	1	1	73	FALSE	73	1
SRC2	1	0	1	1	73	FALSE	73	1
SLE1	1	0	1	1	73	FALSE	73	1
SEI1	1	0	1	1	73	FALSE	73	1
SBP65	1	0	1	1	73	FALSE	73	1
SAU78	1	0	1	1	73	FALSE	73	1
SAU32	1	0	1	1	73	FALSE	73	1
RFS	1	0	1	1	73	FALSE	73	1
RBL2	1	0	1	1	73	FALSE	73	1
PXG1	1	0	1	1	73	FALSE	73	1
PV42A	1	0	1	1	73	FALSE	73	1
PARP3	1	0	1	1	73	FALSE	73	1
P2C63	1	0	1	1	73	FALSE	73	1
P2C39	1	0	1	1	73	FALSE	73	1
P2C28	1	0	1	1	73	FALSE	73	1
P2A13	1	0	1	1	73	FALSE	73	1
OLEO7	1	0	1	1	73	FALSE	73	1
OLEO5	1	0	1	1	73	FALSE	73	1
OLEO1	1	0	1	1	73	FALSE	73	1
MT4B	1	0	1	1	73	FALSE	73	1
LTI65	1	0	1	1	73	FALSE	73	1
LIRP1	1	0	1	1	73	FALSE	73	1
LFG4	1	0	1	1	73	FALSE	73	1
LEGA	1	0	1	1	73	FALSE	73	1
LEAD7	1	0	1	1	73	FALSE	73	1
LEA34	1	0	1	1	73	FALSE	73	1
LEA14	1	0	1	1	73	FALSE	73	1
HSPR2	1	0	1	1	73	FALSE	73	1
HSP16	1	0	1	1	73	FALSE	73	1
HSP14	1	0	1	1	73	FALSE	73	1
HSP11	1	0	1	1	73	FALSE	73	1
HSFA3	1	0	1	1	73	FALSE	73	1
HS23M	1	0	1	1	73	FALSE	73	1
HIP20	1	0	1	1	73	FALSE	73	1
GRP3	1	0	1	1	73	FALSE	73	1
GRP1	1	0	1	1	73	FALSE	73	1
GRDH	1	0	1	1	73	FALSE	73	1
GATA8	1	0	1	1	73	FALSE	73	1
FKB65	1	0	1	1	73	FALSE	73	1
EXO	1	0	1	1	73	FALSE	73	1
EP1L4	1	0	1	1	73	FALSE	73	1
ENG1	1	0	1	1	73	FALSE	73	1
EM4	1	0	1	1	73	FALSE	73	1
EA6	1	0	1	1	73	FALSE	73	1
DRE2A	1	0	1	1	73	FALSE	73	1
DNJB8	1	0	1	1	73	FALSE	73	1
DAAF1	1	0	1	1	73	FALSE	73	1
CSP3	1	0	1	1	73	FALSE	73	1
CSLD3	1	0	1	1	73	FALSE	73	1
CSLCC	1	0	1	1	73	FALSE	73	1
COR47	1	0	1	1	73	FALSE	73	1
COL14	1	0	1	1	73	FALSE	73	1
CML45	1	0	1	1	73	FALSE	73	1
CML35	1	0	1	1	73	FALSE	73	1
CLPB1	1	0	1	1	73	FALSE	73	1
CIPK7	1	0	1	1	73	FALSE	73	1
CAX3	1	0	1	1	73	FALSE	73	1
BAG5	1	0	1	1	73	FALSE	73	1
AOX1	1	0	1	1	73	FALSE	73	1
AMP21	1	0	1	1	73	FALSE	73	1
ALDR	1	0	1	1	73	FALSE	73	1
44472	1	0	1	1	73	FALSE	73	1
