# Supplementary material for: Transcriptome Meta-Analysis Associated Targeting Hub Genes and Pathways of Drought and Salt Stress Responses in Cotton (Gossypium hirsutum): A Network Biology Approach
Source: Front Plant Sci. 2022 Apr 25;13:818472. doi: 10.3389/fpls.2022.818472 (PMC9083274; doi:10.3389/fpls.2022.818472)
Supplement: Supplementary file 3 [file Table_3.xlsx]

## Sheet: S3A
Table S3A: Biological process of DEGs with pvalue ≤ 0.05 filter in drought
Drought up-regulated genes biological processes in leaf tissue
GO id	Category	Term	PValue
GO:0005983	GO_BiologicalProcess	starch catabolic process	0.00013
GO:0005992	GO_BiologicalProcess	trehalose biosynthetic process	0.000336
GO:0009308	GO_BiologicalProcess	amine metabolic process	0.000317
GO:0009314	GO_BiologicalProcess	response to radiation	1.31e-10
GO:0009414	GO_BiologicalProcess	response to water deprivation	3.12e-05
GO:0009415	GO_BiologicalProcess	response to water	4.27e-05
GO:0009416	GO_BiologicalProcess	response to light stimulus	4.62e-11
GO:0009698	GO_BiologicalProcess	phenylpropanoid metabolic process	0.00031
GO:0009737	GO_BiologicalProcess	response to abscisic acid	1.03e-06
GO:0009751	GO_BiologicalProcess	response to salicylic acid	7.46e-06
GO:0009753	GO_BiologicalProcess	response to jasmonic acid	0.000127
GO:0009812	GO_BiologicalProcess	flavonoid metabolic process	2.54e-05
GO:0009813	GO_BiologicalProcess	flavonoid biosynthetic process	5.83e-06
GO:0009826	GO_BiologicalProcess	unidimensional cell growth	4.98e-08
GO:0009827	GO_BiologicalProcess	plant-type cell wall modification	1.08e-05
GO:0009828	GO_BiologicalProcess	plant-type cell wall loosening	6.31e-07
GO:0009909	GO_BiologicalProcess	regulation of flower development	0.000284
GO:0010029	GO_BiologicalProcess	regulation of seed germination	0.000192
GO:0010243	GO_BiologicalProcess	response to organonitrogen compound	2.49e-05
GO:0010498	GO_BiologicalProcess	proteasomal protein catabolic process	0.000198
GO:0014070	GO_BiologicalProcess	response to organic cyclic compound	7.68e-07
GO:0032989	GO_BiologicalProcess	cellular component morphogenesis	5.05e-06
GO:0033993	GO_BiologicalProcess	response to lipid	3.2e-08
GO:0048580	GO_BiologicalProcess	regulation of post-embryonic development	2.32e-06
GO:0048646	GO_BiologicalProcess	anatomical structure formation involved in morphogenesis	0.000118
GO:0050793	GO_BiologicalProcess	regulation of developmental process	4.82e-07
GO:0051239	GO_BiologicalProcess	regulation of multicellular organismal process	4.24e-06
GO:0060560	GO_BiologicalProcess	developmental growth involved in morphogenesis	3e-07
GO:0071214	GO_BiologicalProcess	cellular response to abiotic stimulus	0.000108
GO:0071669	GO_BiologicalProcess	plant-type cell wall organization or biogenesis	1.82e-05
GO:0097305	GO_BiologicalProcess	response to alcohol	1.17e-06
GO:0104004	GO_BiologicalProcess	cellular response to environmental stimulus	0.000108
GO:1900140	GO_BiologicalProcess	regulation of seedling development	0.000238
GO:1901700	GO_BiologicalProcess	response to oxygen-containing compound	1.69e-17
GO:2000026	GO_BiologicalProcess	regulation of multicellular organismal development	3.25e-06
GO:2000241	GO_BiologicalProcess	regulation of reproductive process	0.000147
Drought down-regulated genes biological processes in leaf tissue
GO id	Category	Term	PValue
GO:0000302	GO_BiologicalProcess	response to reactive oxygen species	1.17e-08
GO:0006073	GO_BiologicalProcess	cellular glucan metabolic process	1.15e-05
GO:0006631	GO_BiologicalProcess	fatty acid metabolic process	0.000212
GO:0006633	GO_BiologicalProcess	fatty acid biosynthetic process	2.03e-05
GO:0006778	GO_BiologicalProcess	porphyrin-containing compound metabolic process	8.77e-05
GO:0006811	GO_BiologicalProcess	ion transport	5.47e-09
GO:0006812	GO_BiologicalProcess	cation transport	8.24e-07
GO:0006820	GO_BiologicalProcess	anion transport	0.000138
GO:0006873	GO_BiologicalProcess	cellular ion homeostasis	0.00014
GO:0006979	GO_BiologicalProcess	response to oxidative stress	5.24e-08
GO:0007602	GO_BiologicalProcess	phototransduction	0.000311
GO:0008610	GO_BiologicalProcess	lipid biosynthetic process	2.63e-07
GO:0009266	GO_BiologicalProcess	response to temperature stimulus	1.63e-07
GO:0009314	GO_BiologicalProcess	response to radiation	1.94e-25
GO:0009414	GO_BiologicalProcess	response to water deprivation	0.000109
GO:0009415	GO_BiologicalProcess	response to water	0.000146
GO:0009416	GO_BiologicalProcess	response to light stimulus	2e-25
GO:0009581	GO_BiologicalProcess	detection of external stimulus	9.98e-05
GO:0009582	GO_BiologicalProcess	detection of abiotic stimulus	9.98e-05
GO:0009583	GO_BiologicalProcess	detection of light stimulus	0.000338
GO:0009585	GO_BiologicalProcess	red, far-red light phototransduction	0.000311
GO:0009606	GO_BiologicalProcess	tropism	0.000202
GO:0009637	GO_BiologicalProcess	response to blue light	3.01e-07
GO:0009639	GO_BiologicalProcess	response to red or far red light	7.59e-13
GO:0009640	GO_BiologicalProcess	photomorphogenesis	9.87e-10
GO:0009641	GO_BiologicalProcess	shade avoidance	9.22e-06
GO:0009642	GO_BiologicalProcess	response to light intensity	1.35e-09
GO:0009644	GO_BiologicalProcess	response to high light intensity	5.19e-06
GO:0009657	GO_BiologicalProcess	plastid organization	1.97e-09
GO:0009658	GO_BiologicalProcess	chloroplast organization	1.27e-08
GO:0009690	GO_BiologicalProcess	cytokinin metabolic process	0.000187
GO:0009743	GO_BiologicalProcess	response to carbohydrate	0.000105
GO:0009751	GO_BiologicalProcess	response to salicylic acid	1.34e-06
GO:0009767	GO_BiologicalProcess	photosynthetic electron transport chain	5e-05
GO:0009791	GO_BiologicalProcess	post-embryonic development	6.03e-15
GO:0009827	GO_BiologicalProcess	plant-type cell wall modification	1.05e-05
GO:0009909	GO_BiologicalProcess	regulation of flower development	5.32e-05
GO:0010017	GO_BiologicalProcess	red or far-red light signaling pathway	2.97e-05
GO:0010025	GO_BiologicalProcess	wax biosynthetic process	0.000332
GO:0010035	GO_BiologicalProcess	response to inorganic substance	1.29e-11
GO:0010038	GO_BiologicalProcess	response to metal ion	2.41e-06
GO:0010114	GO_BiologicalProcess	response to red light	8.42e-05
GO:0010218	GO_BiologicalProcess	response to far red light	0.000262
GO:0010243	GO_BiologicalProcess	response to organonitrogen compound	0.000115
GO:0010410	GO_BiologicalProcess	hemicellulose metabolic process	0.000309
GO:0010411	GO_BiologicalProcess	xyloglucan metabolic process	1.05e-05
GO:0014070	GO_BiologicalProcess	response to organic cyclic compound	3.83e-08
GO:0015979	GO_BiologicalProcess	photosynthesis	5.58e-08
GO:0015994	GO_BiologicalProcess	chlorophyll metabolic process	2.97e-05
GO:0015995	GO_BiologicalProcess	chlorophyll biosynthetic process	0.000219
GO:0016053	GO_BiologicalProcess	organic acid biosynthetic process	1.91e-05
GO:0019684	GO_BiologicalProcess	photosynthesis, light reaction	3.8e-05
GO:0019725	GO_BiologicalProcess	cellular homeostasis	0.000241
GO:0030001	GO_BiologicalProcess	metal ion transport	1.13e-05
GO:0030003	GO_BiologicalProcess	cellular cation homeostasis	5.66e-05
GO:0032787	GO_BiologicalProcess	monocarboxylic acid metabolic process	3.53e-06
GO:0032879	GO_BiologicalProcess	regulation of localization	0.00014
GO:0033013	GO_BiologicalProcess	tetrapyrrole metabolic process	0.000101
GO:0034220	GO_BiologicalProcess	ion transmembrane transport	2.27e-05
GO:0034762	GO_BiologicalProcess	regulation of transmembrane transport	9.36e-05
GO:0042537	GO_BiologicalProcess	benzene-containing compound metabolic process	0.000338
GO:0042542	GO_BiologicalProcess	response to hydrogen peroxide	5.15e-06
GO:0042546	GO_BiologicalProcess	cell wall biogenesis	2.96e-05
GO:0043269	GO_BiologicalProcess	regulation of ion transport	8.94e-05
GO:0044042	GO_BiologicalProcess	glucan metabolic process	1.15e-05
GO:0044262	GO_BiologicalProcess	cellular carbohydrate metabolic process	1.65e-06
GO:0044264	GO_BiologicalProcess	cellular polysaccharide metabolic process	0.000133
GO:0044283	GO_BiologicalProcess	small molecule biosynthetic process	2.13e-06
GO:0045229	GO_BiologicalProcess	external encapsulating structure organization	6.58e-06
GO:0046148	GO_BiologicalProcess	pigment biosynthetic process	2.06e-06
GO:0046394	GO_BiologicalProcess	carboxylic acid biosynthetic process	1.91e-05
GO:0046686	GO_BiologicalProcess	response to cadmium ion	5.56e-05
GO:0048366	GO_BiologicalProcess	leaf development	2.01e-06
GO:0048367	GO_BiologicalProcess	shoot system development	3.63e-09
GO:0048580	GO_BiologicalProcess	regulation of post-embryonic development	8.61e-10
GO:0048581	GO_BiologicalProcess	negative regulation of post-embryonic development	0.000108
GO:0048831	GO_BiologicalProcess	regulation of shoot system development	8.9e-06
GO:0048878	GO_BiologicalProcess	chemical homeostasis	2.4e-06
GO:0050793	GO_BiologicalProcess	regulation of developmental process	1.79e-10
GO:0050801	GO_BiologicalProcess	ion homeostasis	2.6e-06
GO:0051049	GO_BiologicalProcess	regulation of transport	0.000182
GO:0051093	GO_BiologicalProcess	negative regulation of developmental process	1.88e-05
GO:0051239	GO_BiologicalProcess	regulation of multicellular organismal process	4.76e-09
GO:0051241	GO_BiologicalProcess	negative regulation of multicellular organismal process	4.97e-05
GO:0055065	GO_BiologicalProcess	metal ion homeostasis	1.35e-06
GO:0055076	GO_BiologicalProcess	transition metal ion homeostasis	0.00033
GO:0055080	GO_BiologicalProcess	cation homeostasis	7.35e-07
GO:0055082	GO_BiologicalProcess	cellular chemical homeostasis	1.26e-05
GO:0071214	GO_BiologicalProcess	cellular response to abiotic stimulus	1.2e-07
GO:0071478	GO_BiologicalProcess	cellular response to radiation	1.01e-07
GO:0071482	GO_BiologicalProcess	cellular response to light stimulus	7.14e-08
GO:0071483	GO_BiologicalProcess	cellular response to blue light	1.86e-05
GO:0071489	GO_BiologicalProcess	cellular response to red or far red light	4.3e-06
GO:0071555	GO_BiologicalProcess	cell wall organization	2.26e-06
GO:0071669	GO_BiologicalProcess	plant-type cell wall organization or biogenesis	3.84e-06
GO:0072330	GO_BiologicalProcess	monocarboxylic acid biosynthetic process	2.35e-06
GO:0080167	GO_BiologicalProcess	response to karrikin	7.3e-05
GO:0090351	GO_BiologicalProcess	seedling development	0.000242
GO:0097305	GO_BiologicalProcess	response to alcohol	3.66e-06
GO:0098771	GO_BiologicalProcess	inorganic ion homeostasis	2.24e-06
GO:0104004	GO_BiologicalProcess	cellular response to environmental stimulus	1.2e-07
GO:1901700	GO_BiologicalProcess	response to oxygen-containing compound	9.13e-19
GO:2000026	GO_BiologicalProcess	regulation of multicellular organismal development	5.91e-10
Drought up-regulated genes biological processes in root tissue
GO id	Category	Term	PValue
GO:0000160	GO_BiologicalProcess	phosphorelay signal transduction system	4.29e-07
GO:0000302	GO_BiologicalProcess	response to reactive oxygen species	0.000655
GO:0001666	GO_BiologicalProcess	response to hypoxia	4.47e-05
GO:0006949	GO_BiologicalProcess	syncytium formation	0.000511
GO:0007034	GO_BiologicalProcess	vacuolar transport	0.037365
GO:0009414	GO_BiologicalProcess	response to water deprivation	9.76e-06
GO:0009415	GO_BiologicalProcess	response to water	1.31e-05
GO:0009626	GO_BiologicalProcess	plant-type hypersensitive response	0.000248
GO:0009639	GO_BiologicalProcess	response to red or far red light	0.000186
GO:0009664	GO_BiologicalProcess	plant-type cell wall organization	0.000277
GO:0009723	GO_BiologicalProcess	response to ethylene	4.58e-07
GO:0009751	GO_BiologicalProcess	response to salicylic acid	1.62e-07
GO:0009813	GO_BiologicalProcess	flavonoid biosynthetic process	0.000317
GO:0009814	GO_BiologicalProcess	defense response, incompatible interaction	0.000116
GO:0009828	GO_BiologicalProcess	plant-type cell wall loosening	0.000456
GO:0009873	GO_BiologicalProcess	ethylene-activated signaling pathway	7.98e-05
GO:0010200	GO_BiologicalProcess	response to chitin	8.88e-09
GO:0010243	GO_BiologicalProcess	response to organonitrogen compound	1.58e-10
GO:0012501	GO_BiologicalProcess	programmed cell death	0.000137
GO:0014070	GO_BiologicalProcess	response to organic cyclic compound	6.7e-11
GO:0031667	GO_BiologicalProcess	response to nutrient levels	9.21e-05
GO:0034050	GO_BiologicalProcess	host programmed cell death induced by symbiont	0.000264
GO:0034754	GO_BiologicalProcess	cellular hormone metabolic process	0.000293
GO:0036293	GO_BiologicalProcess	response to decreased oxygen levels	5.12e-07
GO:0036294	GO_BiologicalProcess	cellular response to decreased oxygen levels	0.000169
GO:0042391	GO_BiologicalProcess	regulation of membrane potential	0.000686
GO:0042542	GO_BiologicalProcess	response to hydrogen peroxide	5.47e-06
GO:0042545	GO_BiologicalProcess	cell wall modification	4.49e-06
GO:0045087	GO_BiologicalProcess	innate immune response	3.45e-07
GO:0046148	GO_BiologicalProcess	pigment biosynthetic process	0.000172
GO:0046271	GO_BiologicalProcess	phenylpropanoid catabolic process	0.000511
GO:0046274	GO_BiologicalProcess	lignin catabolic process	0.000511
GO:0050801	GO_BiologicalProcess	ion homeostasis	4.38e-05
GO:0055065	GO_BiologicalProcess	metal ion homeostasis	0.000131
GO:0055080	GO_BiologicalProcess	cation homeostasis	0.00016
GO:0070482	GO_BiologicalProcess	response to oxygen levels	5.72e-07
GO:0071369	GO_BiologicalProcess	cellular response to ethylene stimulus	0.00018
GO:0071453	GO_BiologicalProcess	cellular response to oxygen levels	0.000169
GO:0071456	GO_BiologicalProcess	cellular response to hypoxia	0.000125
GO:0098543	GO_BiologicalProcess	detection of other organism	5.42e-05
GO:0098771	GO_BiologicalProcess	inorganic ion homeostasis	6.29e-05
GO:1901698	GO_BiologicalProcess	response to nitrogen compound	4.74e-10
Drought down-regulated genes biological processes in root tissue
GO id	Category	Term	PValue
GO:0005984	GO_BiologicalProcess	disaccharide metabolic process	0.000719
GO:0006720	GO_BiologicalProcess	isoprenoid metabolic process	0.000128
GO:0006721	GO_BiologicalProcess	terpenoid metabolic process	3.74e-05
GO:0006873	GO_BiologicalProcess	cellular ion homeostasis	1.24e-07
GO:0006875	GO_BiologicalProcess	cellular metal ion homeostasis	6.1e-05
GO:0006970	GO_BiologicalProcess	response to osmotic stress	4.15e-11
GO:0008299	GO_BiologicalProcess	isoprenoid biosynthetic process	0.000248
GO:0009314	GO_BiologicalProcess	response to radiation	1.57e-12
GO:0009414	GO_BiologicalProcess	response to water deprivation	2.41e-10
GO:0009415	GO_BiologicalProcess	response to water	3.81e-10
GO:0009416	GO_BiologicalProcess	response to light stimulus	5.73e-13
GO:0009606	GO_BiologicalProcess	tropism	0.000208
GO:0009637	GO_BiologicalProcess	response to blue light	2.11e-05
GO:0009638	GO_BiologicalProcess	phototropism	1.2e-05
GO:0009639	GO_BiologicalProcess	response to red or far red light	1.08e-06
GO:0009641	GO_BiologicalProcess	shade avoidance	5.04e-05
GO:0009642	GO_BiologicalProcess	response to light intensity	8.68e-08
GO:0009644	GO_BiologicalProcess	response to high light intensity	2.26e-08
GO:0009664	GO_BiologicalProcess	plant-type cell wall organization	0.000263
GO:0009735	GO_BiologicalProcess	response to cytokinin	0.000197
GO:0009751	GO_BiologicalProcess	response to salicylic acid	6.82e-06
GO:0009753	GO_BiologicalProcess	response to jasmonic acid	0.000119
GO:0009767	GO_BiologicalProcess	photosynthetic electron transport chain	0.000103
GO:0009773	GO_BiologicalProcess	photosynthetic electron transport in photosystem I	0.000407
GO:0009827	GO_BiologicalProcess	plant-type cell wall modification	1.06e-06
GO:0009828	GO_BiologicalProcess	plant-type cell wall loosening	1.39e-06
GO:0009845	GO_BiologicalProcess	seed germination	0.000248
GO:0010025	GO_BiologicalProcess	wax biosynthetic process	3.43e-06
GO:0010087	GO_BiologicalProcess	phloem or xylem histogenesis	0.000382
GO:0010089	GO_BiologicalProcess	xylem development	0.000664
GO:0010114	GO_BiologicalProcess	response to red light	0.037812
GO:0010117	GO_BiologicalProcess	photoprotection	3.29e-07
GO:0010166	GO_BiologicalProcess	wax metabolic process	4.25e-06
GO:0010218	GO_BiologicalProcess	response to far red light	0.000414
GO:0010359	GO_BiologicalProcess	regulation of anion channel activity	0.000152
GO:0010431	GO_BiologicalProcess	seed maturation	0.000719
GO:0010565	GO_BiologicalProcess	regulation of cellular ketone metabolic process	0.037812
GO:0015979	GO_BiologicalProcess	photosynthesis	8.98e-06
GO:0016114	GO_BiologicalProcess	terpenoid biosynthetic process	7.15e-05
GO:0019684	GO_BiologicalProcess	photosynthesis, light reaction	2.04e-05
GO:0019725	GO_BiologicalProcess	cellular homeostasis	2.13e-07
GO:0022898	GO_BiologicalProcess	regulation of transmembrane transporter activity	0.00026
GO:0030003	GO_BiologicalProcess	cellular cation homeostasis	3.83e-07
GO:0030004	GO_BiologicalProcess	cellular monovalent inorganic cation homeostasis	1.3e-05
GO:0032409	GO_BiologicalProcess	regulation of transporter activity	0.00026
GO:0032412	GO_BiologicalProcess	regulation of ion transmembrane transporter activity	0.00026
GO:0032879	GO_BiologicalProcess	regulation of localization	0.000439
GO:0033014	GO_BiologicalProcess	tetrapyrrole biosynthetic process	0.037812
GO:0034220	GO_BiologicalProcess	ion transmembrane transport	4.53e-05
GO:0034762	GO_BiologicalProcess	regulation of transmembrane transport	1.78e-05
GO:0034765	GO_BiologicalProcess	regulation of ion transmembrane transport	0.000215
GO:0042545	GO_BiologicalProcess	cell wall modification	5.29e-07
GO:0042592	GO_BiologicalProcess	homeostatic process	2.44e-09
GO:0043269	GO_BiologicalProcess	regulation of ion transport	0.000167
GO:0048527	GO_BiologicalProcess	lateral root development	0.000166
GO:0048528	GO_BiologicalProcess	post-embryonic root development	0.000319
GO:0048580	GO_BiologicalProcess	regulation of post-embryonic development	4.02e-07
GO:0048581	GO_BiologicalProcess	negative regulation of post-embryonic development	7.85e-05
GO:0048584	GO_BiologicalProcess	positive regulation of response to stimulus	0.000113
GO:0048878	GO_BiologicalProcess	chemical homeostasis	3.27e-10
GO:0050801	GO_BiologicalProcess	ion homeostasis	4.08e-09
GO:0051049	GO_BiologicalProcess	regulation of transport	0.000126
GO:0051093	GO_BiologicalProcess	negative regulation of developmental process	5.5e-05
GO:0051241	GO_BiologicalProcess	negative regulation of multicellular organismal process	0.000194
GO:0055065	GO_BiologicalProcess	metal ion homeostasis	2.92e-07
GO:0055067	GO_BiologicalProcess	monovalent inorganic cation homeostasis	6.52e-05
GO:0055076	GO_BiologicalProcess	transition metal ion homeostasis	3.81e-05
GO:0055080	GO_BiologicalProcess	cation homeostasis	9.96e-09
GO:0055082	GO_BiologicalProcess	cellular chemical homeostasis	4.96e-08
GO:0071214	GO_BiologicalProcess	cellular response to abiotic stimulus	2.64e-05
GO:0071478	GO_BiologicalProcess	cellular response to radiation	1.47e-06
GO:0071482	GO_BiologicalProcess	cellular response to light stimulus	1.13e-06
GO:0071483	GO_BiologicalProcess	cellular response to blue light	3.43e-06
GO:0071669	GO_BiologicalProcess	plant-type cell wall organization or biogenesis	5.39e-05
GO:0090351	GO_BiologicalProcess	seedling development	8.12e-05
GO:0098656	GO_BiologicalProcess	anion transmembrane transport	0.000588
GO:0098771	GO_BiologicalProcess	inorganic ion homeostasis	3.26e-08
GO:0104004	GO_BiologicalProcess	cellular response to environmental stimulus	2.64e-05
GO:1901568	GO_BiologicalProcess	fatty acid derivative metabolic process	4.67e-05
GO:1901570	GO_BiologicalProcess	fatty acid derivative biosynthetic process	6.36e-06
GO:1903959	GO_BiologicalProcess	regulation of anion transmembrane transport	0.000201
GO:2000026	GO_BiologicalProcess	regulation of multicellular organismal development	2.23e-07

## Sheet: S3B
Table S3B: Biological process of DEGs with pvalue ≤ 0.05 filter in salt
Salt up-regulated genes biological processes in root tissue
GO id	Category	Term	PValue
GO:0000160	GO_BiologicalProcess	phosphorelay signal transduction system	9.58e-09
GO:0000302	GO_BiologicalProcess	response to reactive oxygen species	3.27e-05
GO:0001101	GO_BiologicalProcess	response to acid chemical	4.73e-24
GO:0005991	GO_BiologicalProcess	trehalose metabolic process	2.1e-06
GO:0005992	GO_BiologicalProcess	trehalose biosynthetic process	1.26e-06
GO:0006511	GO_BiologicalProcess	ubiquitin-dependent protein catabolic process	2.89e-05
GO:0006720	GO_BiologicalProcess	isoprenoid metabolic process	7.32e-06
GO:0006721	GO_BiologicalProcess	terpenoid metabolic process	0.000194
GO:0006949	GO_BiologicalProcess	syncytium formation	8.27e-05
GO:0006970	GO_BiologicalProcess	response to osmotic stress	4.65e-11
GO:0006979	GO_BiologicalProcess	response to oxidative stress	2.05e-07
GO:0007165	GO_BiologicalProcess	signal transduction	1.54e-15
GO:0007231	GO_BiologicalProcess	osmosensory signaling pathway	6.73e-05
GO:0008299	GO_BiologicalProcess	isoprenoid biosynthetic process	4.43e-05
GO:0009266	GO_BiologicalProcess	response to temperature stimulus	1.42e-08
GO:0009314	GO_BiologicalProcess	response to radiation	7.46e-14
GO:0009409	GO_BiologicalProcess	response to cold	1.06e-07
GO:0009414	GO_BiologicalProcess	response to water deprivation	1.71e-11
GO:0009415	GO_BiologicalProcess	response to water	3.05e-11
GO:0009416	GO_BiologicalProcess	response to light stimulus	2.06e-14
GO:0009627	GO_BiologicalProcess	systemic acquired resistance	0.00017
GO:0009642	GO_BiologicalProcess	response to light intensity	3.96e-05
GO:0009651	GO_BiologicalProcess	response to salt stress	3.5e-09
GO:0009664	GO_BiologicalProcess	plant-type cell wall organization	0.000127
GO:0009723	GO_BiologicalProcess	response to ethylene	1.6e-09
GO:0009725	GO_BiologicalProcess	response to hormone	1.72e-19
GO:0009736	GO_BiologicalProcess	cytokinin-activated signaling pathway	1.12e-06
GO:0009737	GO_BiologicalProcess	response to abscisic acid	5.17e-12
GO:0009751	GO_BiologicalProcess	response to salicylic acid	3.59e-10
GO:0009753	GO_BiologicalProcess	response to jasmonic acid	1.38e-05
GO:0009755	GO_BiologicalProcess	hormone-mediated signaling pathway	6.35e-09
GO:0009812	GO_BiologicalProcess	flavonoid metabolic process	0.000263
GO:0009814	GO_BiologicalProcess	defense response, incompatible interaction	1.78e-07
GO:0009817	GO_BiologicalProcess	defense response to fungus, incompatible interaction	0.000149
GO:0009828	GO_BiologicalProcess	plant-type cell wall loosening	0.000202
GO:0009873	GO_BiologicalProcess	ethylene-activated signaling pathway	3.37e-06
GO:0009991	GO_BiologicalProcess	response to extracellular stimulus	0.000149
GO:0010025	GO_BiologicalProcess	wax biosynthetic process	2.64e-05
GO:0010033	GO_BiologicalProcess	response to organic substance	1.83e-32
GO:0010035	GO_BiologicalProcess	response to inorganic substance	7.97e-13
GO:0010150	GO_BiologicalProcess	leaf senescence	8.16e-05
GO:0010166	GO_BiologicalProcess	wax metabolic process	3.26e-05
GO:0010200	GO_BiologicalProcess	response to chitin	4.06e-18
GO:0010224	GO_BiologicalProcess	response to UV-B	2.68e-05
GO:0010243	GO_BiologicalProcess	response to organonitrogen compound	1.33e-22
GO:0010498	GO_BiologicalProcess	proteasomal protein catabolic process	7.42e-08
GO:0012501	GO_BiologicalProcess	programmed cell death	9.75e-05
GO:0014070	GO_BiologicalProcess	response to organic cyclic compound	3.11e-13
GO:0019941	GO_BiologicalProcess	modification-dependent protein catabolic process	2.99e-05
GO:0022622	GO_BiologicalProcess	root system development	7.66e-05
GO:0030163	GO_BiologicalProcess	protein catabolic process	1.69e-05
GO:0031667	GO_BiologicalProcess	response to nutrient levels	0.000168
GO:0032870	GO_BiologicalProcess	cellular response to hormone stimulus	1.06e-08
GO:0033993	GO_BiologicalProcess	response to lipid	1.09e-15
GO:0034220	GO_BiologicalProcess	ion transmembrane transport	0.000191
GO:0035556	GO_BiologicalProcess	intracellular signal transduction	5.56e-08
GO:0036293	GO_BiologicalProcess	response to decreased oxygen levels	1.09e-05
GO:0042538	GO_BiologicalProcess	hyperosmotic salinity response	0.000223
GO:0042542	GO_BiologicalProcess	response to hydrogen peroxide	8.74e-07
GO:0042545	GO_BiologicalProcess	cell wall modification	2.96e-05
GO:0042742	GO_BiologicalProcess	defense response to bacterium	1.29e-06
GO:0042787	GO_BiologicalProcess	protein ubiquitination involved in ubiquitin-dependent protein catabolic process	6.24e-06
GO:0042991	GO_BiologicalProcess	transcription factor import into nucleus	6.73e-05
GO:0043161	GO_BiologicalProcess	proteasome-mediated ubiquitin-dependent protein catabolic process	2.01e-06
GO:0043207	GO_BiologicalProcess	response to external biotic stimulus	4.88e-11
GO:0043632	GO_BiologicalProcess	modification-dependent macromolecule catabolic process	3.53e-05
GO:0044257	GO_BiologicalProcess	cellular protein catabolic process	2.37e-05
GO:0044262	GO_BiologicalProcess	cellular carbohydrate metabolic process	0.000187
GO:0045087	GO_BiologicalProcess	innate immune response	2.38e-09
GO:0045229	GO_BiologicalProcess	external encapsulating structure organization	2.06e-05
GO:0046271	GO_BiologicalProcess	phenylpropanoid catabolic process	8.27e-05
GO:0046274	GO_BiologicalProcess	lignin catabolic process	8.27e-05
GO:0046351	GO_BiologicalProcess	disaccharide biosynthetic process	7.5e-05
GO:0048364	GO_BiologicalProcess	root development	7.25e-05
GO:0048580	GO_BiologicalProcess	regulation of post-embryonic development	3.64e-07
GO:0050793	GO_BiologicalProcess	regulation of developmental process	1.93e-07
GO:0051239	GO_BiologicalProcess	regulation of multicellular organismal process	3.25e-07
GO:0051603	GO_BiologicalProcess	proteolysis involved in cellular protein catabolic process	1.78e-05
GO:0051707	GO_BiologicalProcess	response to other organism	4.6e-11
GO:0070482	GO_BiologicalProcess	response to oxygen levels	1.22e-05
GO:0070887	GO_BiologicalProcess	cellular response to chemical stimulus	8.6e-15
GO:0071214	GO_BiologicalProcess	cellular response to abiotic stimulus	4.45e-05
GO:0071229	GO_BiologicalProcess	cellular response to acid chemical	2.57e-06
GO:0071310	GO_BiologicalProcess	cellular response to organic substance	1.73e-11
GO:0071368	GO_BiologicalProcess	cellular response to cytokinin stimulus	1.43e-06
GO:0071369	GO_BiologicalProcess	cellular response to ethylene stimulus	1.08e-05
GO:0071396	GO_BiologicalProcess	cellular response to lipid	7.82e-05
GO:0071495	GO_BiologicalProcess	cellular response to endogenous stimulus	4.44e-09
GO:0071555	GO_BiologicalProcess	cell wall organization	7.34e-06
GO:0071669	GO_BiologicalProcess	plant-type cell wall organization or biogenesis	9.26e-06
GO:0090567	GO_BiologicalProcess	reproductive shoot system development	2.82e-05
GO:0090693	GO_BiologicalProcess	plant organ senescence	8.71e-05
GO:0097305	GO_BiologicalProcess	response to alcohol	6.27e-12
GO:0098542	GO_BiologicalProcess	defense response to other organism	2.21e-08
GO:0104004	GO_BiologicalProcess	cellular response to environmental stimulus	4.45e-05
GO:1901565	GO_BiologicalProcess	organonitrogen compound catabolic process	2.6e-06
GO:1901570	GO_BiologicalProcess	fatty acid derivative biosynthetic process	4.83e-05
GO:1901698	GO_BiologicalProcess	response to nitrogen compound	2.48e-19
GO:1901700	GO_BiologicalProcess	response to oxygen-containing compound	7.99e-35
GO:1901701	GO_BiologicalProcess	cellular response to oxygen-containing compound	7.56e-07
GO:2000026	GO_BiologicalProcess	regulation of multicellular organismal development	5.2e-08
Salt down-regulated genes biological processes in root tissue
GO id	Category	Term	PValue
GO:0000302	GO_BiologicalProcess	response to reactive oxygen species	6.94e-05
GO:0006720	GO_BiologicalProcess	isoprenoid metabolic process	0.000419
GO:0006721	GO_BiologicalProcess	terpenoid metabolic process	0.000142
GO:0006873	GO_BiologicalProcess	cellular ion homeostasis	6.1e-08
GO:0006875	GO_BiologicalProcess	cellular metal ion homeostasis	0.000329
GO:0006949	GO_BiologicalProcess	syncytium formation	0.000406
GO:0006970	GO_BiologicalProcess	response to osmotic stress	7.68e-12
GO:0009267	GO_BiologicalProcess	cellular response to starvation	5.64e-05
GO:0009414	GO_BiologicalProcess	response to water deprivation	1.29e-13
GO:0009415	GO_BiologicalProcess	response to water	2.24e-13
GO:0009416	GO_BiologicalProcess	response to light stimulus	2.15e-12
GO:0009637	GO_BiologicalProcess	response to blue light	1.34e-05
GO:0009638	GO_BiologicalProcess	phototropism	0.000332
GO:0009639	GO_BiologicalProcess	response to red or far red light	1.83e-05
GO:0009642	GO_BiologicalProcess	response to light intensity	3.85e-10
GO:0009644	GO_BiologicalProcess	response to high light intensity	7.56e-10
GO:0009651	GO_BiologicalProcess	response to salt stress	5.72e-13
GO:0009664	GO_BiologicalProcess	plant-type cell wall organization	0.000172
GO:0009690	GO_BiologicalProcess	cytokinin metabolic process	0.000419
GO:0009737	GO_BiologicalProcess	response to abscisic acid	2.28e-10
GO:0009751	GO_BiologicalProcess	response to salicylic acid	3.51e-06
GO:0009767	GO_BiologicalProcess	photosynthetic electron transport chain	7.4e-05
GO:0009812	GO_BiologicalProcess	flavonoid metabolic process	7.27e-05
GO:0009813	GO_BiologicalProcess	flavonoid biosynthetic process	0.000208
GO:0009827	GO_BiologicalProcess	plant-type cell wall modification	6.65e-07
GO:0009828	GO_BiologicalProcess	plant-type cell wall loosening	9.29e-07
GO:0009831	GO_BiologicalProcess	plant-type cell wall modification involved in multidimensional cell growth	9.25e-05
GO:0010114	GO_BiologicalProcess	response to red light	0.000635
GO:0010117	GO_BiologicalProcess	photoprotection	2.49e-07
GO:0010162	GO_BiologicalProcess	seed dormancy process	0.000304
GO:0010207	GO_BiologicalProcess	photosystem II assembly	0.000688
GO:0010218	GO_BiologicalProcess	response to far red light	0.000301
GO:0010359	GO_BiologicalProcess	regulation of anion channel activity	0.000124
GO:0010431	GO_BiologicalProcess	seed maturation	4.37e-06
GO:0015979	GO_BiologicalProcess	photosynthesis	4.63e-06
GO:0016108	GO_BiologicalProcess	tetraterpenoid metabolic process	0.000562
GO:0016114	GO_BiologicalProcess	terpenoid biosynthetic process	0.000302
GO:0016116	GO_BiologicalProcess	carotenoid metabolic process	0.000562
GO:0019684	GO_BiologicalProcess	photosynthesis, light reaction	1.23e-05
GO:0019725	GO_BiologicalProcess	cellular homeostasis	5.39e-07
GO:0022898	GO_BiologicalProcess	regulation of transmembrane transporter activity	0.000212
GO:0030003	GO_BiologicalProcess	cellular cation homeostasis	1.79e-05
GO:0030004	GO_BiologicalProcess	cellular monovalent inorganic cation homeostasis	0.000188
GO:0031667	GO_BiologicalProcess	response to nutrient levels	4.78e-05
GO:0031668	GO_BiologicalProcess	cellular response to extracellular stimulus	5.98e-05
GO:0031669	GO_BiologicalProcess	cellular response to nutrient levels	1.81e-05
GO:0032409	GO_BiologicalProcess	regulation of transporter activity	0.000212
GO:0032412	GO_BiologicalProcess	regulation of ion transmembrane transporter activity	0.000212
GO:0032879	GO_BiologicalProcess	regulation of localization	4.16e-05
GO:0033014	GO_BiologicalProcess	tetrapyrrole biosynthetic process	0.031737
GO:0034220	GO_BiologicalProcess	ion transmembrane transport	4.4e-06
GO:0034754	GO_BiologicalProcess	cellular hormone metabolic process	0.000204
GO:0034762	GO_BiologicalProcess	regulation of transmembrane transport	5.41e-07
GO:0034764	GO_BiologicalProcess	positive regulation of transmembrane transport	1.55e-05
GO:0034765	GO_BiologicalProcess	regulation of ion transmembrane transport	7.82e-06
GO:0042542	GO_BiologicalProcess	response to hydrogen peroxide	0.00043
GO:0042545	GO_BiologicalProcess	cell wall modification	2.64e-07
GO:0042547	GO_BiologicalProcess	cell wall modification involved in multidimensional cell growth	0.000125
GO:0042592	GO_BiologicalProcess	homeostatic process	6.21e-10
GO:0042594	GO_BiologicalProcess	response to starvation	9.56e-05
GO:0043269	GO_BiologicalProcess	regulation of ion transport	8.58e-06
GO:0044070	GO_BiologicalProcess	regulation of anion transport	2.52e-05
GO:0046148	GO_BiologicalProcess	pigment biosynthetic process	1.45e-05
GO:0048527	GO_BiologicalProcess	lateral root development	0.000108
GO:0048528	GO_BiologicalProcess	post-embryonic root development	0.000209
GO:0048581	GO_BiologicalProcess	negative regulation of post-embryonic development	0.000407
GO:0048584	GO_BiologicalProcess	positive regulation of response to stimulus	0.000377
GO:0048878	GO_BiologicalProcess	chemical homeostasis	1.25e-11
GO:0050801	GO_BiologicalProcess	ion homeostasis	1.94e-11
GO:0051049	GO_BiologicalProcess	regulation of transport	9.51e-06
GO:0051050	GO_BiologicalProcess	positive regulation of transport	0.000164
GO:0051093	GO_BiologicalProcess	negative regulation of developmental process	0.00024
GO:0055065	GO_BiologicalProcess	metal ion homeostasis	1.45e-07
GO:0055067	GO_BiologicalProcess	monovalent inorganic cation homeostasis	4.43e-05
GO:0055076	GO_BiologicalProcess	transition metal ion homeostasis	2.44e-05
GO:0055080	GO_BiologicalProcess	cation homeostasis	4.08e-09
GO:0055082	GO_BiologicalProcess	cellular chemical homeostasis	2.3e-08
GO:0071214	GO_BiologicalProcess	cellular response to abiotic stimulus	8.84e-05
GO:0071478	GO_BiologicalProcess	cellular response to radiation	5.11e-05
GO:0071482	GO_BiologicalProcess	cellular response to light stimulus	4.16e-05
GO:0071483	GO_BiologicalProcess	cellular response to blue light	2.44e-06
GO:0071496	GO_BiologicalProcess	cellular response to external stimulus	6.9e-05
GO:0071695	GO_BiologicalProcess	anatomical structure maturation	4.96e-05
GO:0097305	GO_BiologicalProcess	response to alcohol	2.63e-10
GO:0098656	GO_BiologicalProcess	anion transmembrane transport	0.000407
GO:0098771	GO_BiologicalProcess	inorganic ion homeostasis	1.57e-09
GO:0104004	GO_BiologicalProcess	cellular response to environmental stimulus	8.84e-05
GO:1903959	GO_BiologicalProcess	regulation of anion transmembrane transport	0.000164
Salt up-regulated genes biological processes in leaf tissue
GO id	Category	Term	PValue
GO:0006935	GO_BiologicalProcess	chemotaxis	0.00137
GO:0009682	GO_BiologicalProcess	induced systemic resistance	0.001075
GO:0010183	GO_BiologicalProcess	pollen tube guidance	0.00137
GO:0031407	GO_BiologicalProcess	oxylipin metabolic process	0.000698
GO:0031408	GO_BiologicalProcess	oxylipin biosynthetic process	0.000643
GO:0040011	GO_BiologicalProcess	locomotion	0.002461
GO:0042330	GO_BiologicalProcess	taxis	0.00137
GO:0050918	GO_BiologicalProcess	positive chemotaxis	0.00137
GO:0080029	GO_BiologicalProcess	cellular response to boron-containing substance levels	1.42e-05
Salt down-regulated genes biological processes in leaf tissue
GO id	Category	Term	PValue
GO:0006882	GO_BiologicalProcess	cellular zinc ion homeostasis	0.000983
GO:0010351	GO_BiologicalProcess	lithium ion transport	0.000358
GO:0030026	GO_BiologicalProcess	cellular manganese ion homeostasis	0.000894
GO:0051592	GO_BiologicalProcess	response to calcium ion	0.001073
GO:0055062	GO_BiologicalProcess	phosphate ion homeostasis	0.001877
GO:0055069	GO_BiologicalProcess	zinc ion homeostasis	0.00143
GO:0055083	GO_BiologicalProcess	monovalent inorganic anion homeostasis	0.001966
GO:0072505	GO_BiologicalProcess	divalent inorganic anion homeostasis	0.002056
GO:0072506	GO_BiologicalProcess	trivalent inorganic anion homeostasis	0.001877
Salt up-regulated genes biological processes in seed tissue
GO id	Category	Term	PValue
GO:0006108	GO_BiologicalProcess	malate metabolic process	0.005087
GO:0010540	GO_BiologicalProcess	basipetal auxin transport	0.005354
GO:0018107	GO_BiologicalProcess	peptidyl-threonine phosphorylation	0.006155
GO:0018210	GO_BiologicalProcess	peptidyl-threonine modification	0.006155
GO:0030837	GO_BiologicalProcess	negative regulation of actin filament polymerization	0.005087
GO:0031333	GO_BiologicalProcess	negative regulation of protein complex assembly	0.005621
GO:0032272	GO_BiologicalProcess	negative regulation of protein polymerization	0.005621
GO:0032507	GO_BiologicalProcess	maintenance of protein location in cell	0.005087
GO:0042989	GO_BiologicalProcess	sequestering of actin monomers	0.001341
GO:0045185	GO_BiologicalProcess	maintenance of protein location	0.005354
GO:0051494	GO_BiologicalProcess	negative regulation of cytoskeleton organization	0.005888
GO:1902904	GO_BiologicalProcess	negative regulation of supramolecular fiber organization	0.005888
Salt down-regulated genes biological processes in seed tissue
GO id	Category	Term	PValue
GO:0006266	GO_BiologicalProcess	DNA ligation	0.006555
GO:0006271	GO_BiologicalProcess	DNA strand elongation involved in DNA replication	0.012141
GO:0006273	GO_BiologicalProcess	lagging strand elongation	0.005621
GO:0006471	GO_BiologicalProcess	protein ADP-ribosylation	0.003751
GO:0006882	GO_BiologicalProcess	cellular zinc ion homeostasis	0.010283
GO:0008361	GO_BiologicalProcess	regulation of cell size	0.023224
GO:0009269	GO_BiologicalProcess	response to desiccation	0.000269
GO:0009612	GO_BiologicalProcess	response to mechanical stimulus	0.016774
GO:0010044	GO_BiologicalProcess	response to aluminum ion	0.011212
GO:0010344	GO_BiologicalProcess	seed oilbody biogenesis	0.005621
GO:0010351	GO_BiologicalProcess	lithium ion transport	0.003751
GO:0010411	GO_BiologicalProcess	xyloglucan metabolic process	1.72e-05
GO:0019915	GO_BiologicalProcess	lipid storage	0.020464
GO:0022616	GO_BiologicalProcess	DNA strand elongation	0.012141
GO:0030026	GO_BiologicalProcess	cellular manganese ion homeostasis	0.009352
GO:0032392	GO_BiologicalProcess	DNA geometric change	0.019543
GO:0032508	GO_BiologicalProcess	DNA duplex unwinding	0.019543
GO:0051103	GO_BiologicalProcess	DNA ligation involved in DNA repair	0.005621
GO:0051592	GO_BiologicalProcess	response to calcium ion	0.011212
GO:0055062	GO_BiologicalProcess	phosphate ion homeostasis	0.019543
GO:0055069	GO_BiologicalProcess	zinc ion homeostasis	0.014923
GO:0055083	GO_BiologicalProcess	monovalent inorganic anion homeostasis	0.020464
GO:0072505	GO_BiologicalProcess	divalent inorganic anion homeostasis	0.021385
GO:0072506	GO_BiologicalProcess	trivalent inorganic anion homeostasis	0.019543
