# Supplementary material for: Transcriptome Meta-Analysis Associated Targeting Hub Genes and Pathways of Drought and Salt Stress Responses in Cotton (Gossypium hirsutum): A Network Biology Approach
Source: Front Plant Sci. 2022 Apr 25;13:818472. doi: 10.3389/fpls.2022.818472 (PMC9083274; doi:10.3389/fpls.2022.818472)
Supplement: Supplementary file 4 [file Table_4.xlsx]

## Sheet: S4A
Table S4A: Functional enrichment analysis in drought stress condition with Pvalue ≤ 0.05.
Functional enrichment in leaf tissue
CATEGORY	Gene ontology (GO)	Pval
BP	regulation of macromolecule metabolic process(GO:0060255)	2.2e-06
BP	lipid metabolic process(GO:0006629)	7.1e-05
BP	response to abiotic stimulus(GO:0009628)	0.0035
BP	cellular hormone metabolic process(GO:0034754)	0.013
BP	small molecule biosynthetic process(GO:0044283)	0.015
BP	response to light stimulus(GO:0009416)	0.015
BP	response to oxidative stress(GO:0006979)	0.025
BP	polysaccharide metabolic process(GO:0005976)	0.00019
MF	oxidoreductase activity(GO:0016491)	6.8e-08
MF	oxidoreductase activity or reduction of molecular oxygen(GO:0016705)	2.4e-07
MF	hydrolase activity, acting on glycosyl bonds(GO:0016798)	2.6e-06
MF	transcription factor activity(GO:0003700)	4.5e-06
MF	transferase activity, transferring hexosyl groups(GO:0016758)	0.00027
MF	protein kinase activity(GO:0004672)	0.00031
MF	carbohydrate binding(GO:0030246)	0.0016
MF	phosphotransferase activity, alcohol group as acceptor(GO:0016773)	0.0028
MF	monooxygenase activity(GO:0004497)	0.0089
MF	cytokinin dehydrogenase activity(GO:0019139)	0.013
MF	UDP-N-acetylmuramate dehydrogenase activity(GO:0008762)	0.014
MF	flavin-containing monooxygenase activity(GO:0004499)	0.02
MF	pectinesterase activity(GO:0030599)	0.025
MF	carboxylesterase activity(GO:0004091)	0.025
MF	antioxidant activity(GO:0016209)	0.026
MF	peroxidase activity(GO:0004601)	0.029
MF	lipid binding(GO:0008289)	0.045
CC	extracellular region(GO:0005576)	7.1e-11
CC	cell wall(GO:0005618)	2.6e-05
CC	external encapsulating structure(GO:0030312)	0.00013
CC	apoplast(GO:0048046)	0.0001
CC	microtubule associated complex(GO:0005875)	0.0092
Functional enrichment in root tissue
CATEGORY	Gene ontology (GO)	Pval
BP	regulation of macromolecule metabolic process(GO:0060255)	2.4e-20
BP	response to chemical stimulus(GO:0042221)	6.9e-05
BP	polysaccharide metabolic process(GO:0005976)	0.00046
BP	response to oxidative stress(GO:0006979)	0.001
BP	cellular amino acid derivative biosynthetic process(GO:0042398)	0.0011
BP	proline biosynthetic process(GO:0006561)	0.0033
BP	response to stimulus(GO:0050896)	0.0035
BP	ethylene metabolic process(GO:0009692)	0.0039
BP	1-aminocyclopropane-1-carboxylate metabolic process(GO:0018871)	0.0039
BP	lipid metabolic process(GO:0006629)	0.0041
BP	hormone metabolic process(GO:0042445)	0.014
BP	transmembrane transport(GO:0055085)	0.013
BP	response to stress(GO:0006950)	0.014
BP	defense response(GO:0006952)	0.033
BP	glycogen metabolic process(GO:0005977)	0.037
MF	oxidoreductase activity(GO:0016491)	5.4e-16
MF	transferase activity, transferring hexosyl groups(GO:0016758)	6.5e-05
MF	peptidase inhibitor activity(GO:0030414)	0.00017
MF	flavin-containing monooxygenase activity(GO:0004499)	0.0029
MF	hydrolase activity, hydrolyzing O-glycosyl compounds(GO:0004553)	0.011
MF	pectinesterase activity(GO:0030599)	0.027
MF	NADP or NADPH binding(GO:0050661)	0.048
MF	xyloglucan:xyloglucosyl transferase activity(GO:0016762)	0.035
CC	extracellular region(GO:0005576)	4.2e-09
CC	monolayer-surrounded lipid storage body(GO:0012511)	3.2e-05
CC	lipid particle(GO:0005811)	3.2e-05
CC	external encapsulating structure(GO:0030312)	0.00087
CC	periplasmic space(GO:0042597)	0.0051
CC	outer membrane-bounded periplasmic space(GO:0030288)	0.0051
CC	apoplast(GO:0048046)	0.0016

## Sheet: S4B
Table S4B: Functional enrichment analysis in salt stress condition with Pvalue ≤ 0.05.
Functional enrichment in leaf tissue
CATEGORY	Gene ontology (GO)	Pval
BP	regulation of macromolecule biosynthetic process(GO:0010556)	1.7e-09
BP	carbohydrate metabolic process(GO:0005975)	0.00032
BP	chitin metabolic process(GO:0006030)	0.0032
BP	carbohydrate metabolic process(GO:0005975)	0.00032
BP	cellular polysaccharide metabolic process(GO:0044264)	0.0019
BP	polysaccharide catabolic process(GO:0000272)	0.0033
BP	lipid transport(GO:0006869)	0.0083
BP	nitrogen compound metabolic process(GO:0006807)	0.02
BP	carboxylic acid biosynthetic process(GO:0046394)	0.032
MF	protein tyrosine kinase activity(GO:0004713)	1.4e-12
MF	carbohydrate binding(GO:0030246)	9.9e-08
MF	kinase activity(GO:0016301)	5.2e-07
MF	phosphotransferase activity, alcohol group as acceptor(GO:0016773)	4.1e-06
MF	polysaccharide binding(GO:0030247)	2.6e-05
MF	xyloglucan:xyloglucosyl transferase activity(GO:0016762)	3.7e-05
MF	transferase activity(GO:0016740)	0.0016
MF	oxidoreductase activity(GO:0016491)	0.0026
MF	glutathione transferase activity(GO:0004364)	0.0056
MF	copper ion binding(GO:0005507)	0.0069
MF	phosphatase activity(GO:0016791)	0.0071
MF	hydrolase activity, acting on glycosyl bonds(GO:0016798)	0.0072
MF	phosphoric ester hydrolase activity(GO:0042578)	0.012
MF	UDP-N-acetylmuramate dehydrogenase activity(GO:0008762)	0.02
MF	antioxidant activity(GO:0016209)	0.048
MF	lipoxygenase activity(GO:0016165)	0.044
MF	FAD binding(GO:0050660)	0.031
CC	extracellular region(GO:0005576)	7.5e-09
CC	cell wall(GO:0005618)	0.015
CC	ubiquitin ligase complex(GO:0000151)	0.01
CC	extracellular matrix(GO:0031012)	0.0053
Functional enrichment in root tissue
CATEGORY	Gene ontology (GO)	Pval
BP	regulation of macromolecule biosynthetic process(GO:0010556)	1.1e-24
BP	lipid metabolic process(GO:0006629)	3.9e-05
BP	response to oxidative stress(GO:0006979)	0.00011
BP	response to chemical stimulus(GO:0042221)	0.00019
BP	polysaccharide metabolic process(GO:0005976)	0.00026
BP	chitin metabolic process(GO:0006030)	0.0026
BP	cellular polysaccharide metabolic process(GO:0044264)	0.0031
BP	ethylene biosynthetic process(GO:0009693)	0.0064
BP	1-aminocyclopropane-1-carboxylate metabolic process(GO:0018871)	0.0064
BP	alkene biosynthetic process(GO:0043450)	0.0079
BP	polysaccharide catabolic process(GO:0000272)	0.0085
BP	response to stimulus(GO:0050896)	0.0087
BP	cytokinin metabolic process(GO:0009690)	0.043
BP	phosphoinositide phosphorylation(GO:0046854)	0.034
BP	spermidine metabolic process(GO:0008216)	0.027
BP	hormone metabolic process(GO:0042445)	0.043
BP	amine catabolic process(GO:0009310)	0.035
BP	response to stress(GO:0006950)	0.034
BP	lipid phosphorylation(GO:0046834)	0.034
BP	response to abiotic stimulus(GO:0009628)	0.023
BP	nicotianamine metabolic process(GO:0030417)	0.04
MF	oxidoreductase activity(GO:0016491)	1.1e-14
MF	protein serine/threonine kinase activity(GO:0004674)	5.8e-09
MF	oxidoreductase activity(GO:0016706)	1.6e-07
MF	transferase activity, transferring glycosyl groups(GO:0016757)	5.4e-06
MF	peroxidase activity(GO:0004601)	3.8e-05
MF	xyloglucan:xyloglucosyl transferase activity(GO:0016762)	5.7e-05
MF	phosphotransferase activity, alcohol group as acceptor(GO:0016773)	0.00027
MF	antioxidant activity(GO:0016209)	0.00027
MF	secondary active transmembrane transporter activity(GO:0015291)	0.00073
MF	carbon-sulfur lyase activity(GO:0016846)	0.0011
MF	UDP-N-acetylmuramate dehydrogenase activity(GO:0008762)	0.0038
MF	hydrolase activity, acting on glycosyl bonds(GO:0016798)	0.0051
MF	1-aminocyclopropane-1-carboxylate synthase activity(GO:0016847)	0.0064
MF	NADP or NADPH binding(GO:0050661)	0.01
MF	carboxylesterase activity(GO:0004091)	0.024
MF	cytokinin dehydrogenase activity(GO:0019139)	0.043
MF	glutathione transferase activity(GO:0004364)	0.026
MF	Ras guanyl-nucleotide exchange factor activity(GO:0005088)	0.045
MF	nicotianamine synthase activity(GO:0030410)	0.04
CC	extracellular region(GO:0005576)	2.2e-11
CC	apoplast(GO:0048046)	0.00047
CC	cell wall(GO:0005618)	0.0032
