# Supplementary material for: Transcriptome Meta-Analysis Associated Targeting Hub Genes and Pathways of Drought and Salt Stress Responses in Cotton (Gossypium hirsutum): A Network Biology Approach
Source: Front Plant Sci. 2022 Apr 25;13:818472. doi: 10.3389/fpls.2022.818472 (PMC9083274; doi:10.3389/fpls.2022.818472)
Supplement: Supplementary file 5 [file Table_5.xlsx]

## Sheet: Sheet1
Table S5A: KEGG pathways in drought stress condition with Pvalue ≤ 0.05.
KEGG pathways in drought (leaf)
Pathway id	Category	Term	PValue
ath00040	KEGG_PATHWAY	Pentose and glucuronate interconversions	0.0008832
ath00130	KEGG_PATHWAY	Ubiquinone and other terpenoid-quinone biosynthesis	0.0121413
ath00780	KEGG_PATHWAY	Biotin metabolism	0.0429936
ath03010	KEGG_PATHWAY	Ribosome	0.0470925
ath00910	KEGG_PATHWAY	Nitrogen metabolism	0.0523243
KEGG pathways in drought (root)
Pathway id	Category	Term	PValue
ath00196	KEGG_PATHWAY	Photosynthesis - antenna proteins	0.0199095
ath04016	KEGG_PATHWAY	MAPK signaling pathway - plant	0.0409669
ath00902	KEGG_PATHWAY	Monoterpenoid biosynthesis	0.0452434
Table S5B: KEGG pathways in salt stress condition with Pvalue ≤ 0.05.
KEGG pathways in salt (leaf)
Pathway id	Category	Term	PValue
ath01100	KEGG_PATHWAY	Metabolic pathways	0.0116495
ath04144	KEGG_PATHWAY	Endocytosis	0.0586334
KEGG pathways in salt (root)
Pathway id	Category	Term	PValue
ath00950	KEGG_PATHWAY	Isoquinoline alkaloid biosynthesis	0.009832
ath00620	KEGG_PATHWAY	Pyruvate metabolism	0.01834
ath00520	KEGG_PATHWAY	Amino sugar and nucleotide sugar metabolism	0.0192853
ath00020	KEGG_PATHWAY	Citrate cycle (TCA cycle)	0.019918
ath01100	KEGG_PATHWAY	Metabolic pathways	0.0288524
ath00940	KEGG_PATHWAY	Phenylpropanoid biosynthesis	0.0396854
ath01230	KEGG_PATHWAY	Biosynthesis of amino acids	0.0437792
