# Supplementary material for: Transcriptome Meta-Analysis Associated Targeting Hub Genes and Pathways of Drought and Salt Stress Responses in Cotton (Gossypium hirsutum): A Network Biology Approach
Source: Front Plant Sci. 2022 Apr 25;13:818472. doi: 10.3389/fpls.2022.818472 (PMC9083274; doi:10.3389/fpls.2022.818472)
Supplement: Supplementary file 6 [file Table_6.xlsx]

## Sheet: Sheet1
Common upregulated genes in drought and salt								Common downregulated genes in drought and salt
		Drought Upregulated		Salt Upregulated						Drought downregulated		Salt downregulated
Gene Ids	Gene names	log2(fold_change)	p_value	log2(fold_change)	p_value			Gene Ids	Gene names	log2(fold_change)	p_value	log2(fold_change)	p_value
Ghir_A01G000310	CSP3	2.66241	5e-05	2.90263	5e-05			Ghir_A01G001210	VITH4	-2.94535	5e-05	1.34363	5e-05
Ghir_A01G000430	BBX20	2.33649	5e-05	2.12168	5e-05			Ghir_A01G002010	GLK1	-3.54	5e-05	0.938087	5e-05
Ghir_A01G005030	CLE5	4.72759	5e-05	2.64108	0.00075			Ghir_A01G003050	CVIF1	-2.07629	5e-05	2.94549	5e-05
Ghir_A01G006360	TPSGD	2.18431	5e-05	2.30762	5e-05			Ghir_A01G003580	NCED1	-4.33797	5e-05	1.78834	5e-05
Ghir_A01G006720	VUP4	2.78497	0.0001	2.56085	5e-05			Ghir_A01G003660	G2OX1	-4.98412	5e-05	0.585789	0.0004
Ghir_A01G007170	GGR	2.7515	0.0075	2.65615	0.00945			Ghir_A01G008910	RPT3	-5.61769	5e-05	3.44474	5e-05
Ghir_A01G008580	XERIC	3.31359	5e-05	6.06194	5e-05			Ghir_A01G012570	Y2197	-2.87638	5e-05	0.406378	5e-05
Ghir_A01G015040	PLY5	2.41325	0.0001	2.86709	5e-05			Ghir_A01G013550	PPA3	-3.05614	5e-05	5.98084	5e-05
Ghir_A01G016540	CHI1	3.90587	5e-05	3.78006	0.0007			Ghir_A01G015620	PIP15	-2.8414	5e-05	1.29563	5e-05
Ghir_A01G019420	DCS3	2.73461	5e-05	5.26227	0.0003			Ghir_A01G016150	DHGY	-2.69306	5e-05	0.43247	5e-05
Ghir_A01G019680	SILD	3.47144	5e-05	5.8333	5e-05			Ghir_A01G016530	LOG5	-2.73499	5e-05	0.356243	5e-05
Ghir_A01G019690	SILD	3.03385	5e-05	5.87841	5e-05			Ghir_A01G018350	AAP3	-2.33917	0.00065	0.269785	0.00025
Ghir_A01G020490	TIP11	2.2323	5e-05	2.58997	5e-05			Ghir_A01G019590	LOG7	-2.0807	0.0003	0.464836	0.0001
Ghir_A01G020530	ACR10	2.64257	5e-05	2.33017	5e-05			Ghir_A01G020960	GGPPS	-2.7245	0.0052	0.159343	0.0092
Ghir_A01G021450	P5CS2	2.17594	0.00075	2.84417	0.0001			Ghir_A01G022160	CAX3	-2.09435	5e-05	-3.85743	0.00015
Ghir_A02G002860	GST23	2.08483	5e-05	5.87053	5e-05			Ghir_A02G000630	AGT23	-2.67076	5e-05	23.6079	5e-05
Ghir_A02G003980	ERF92	2.08691	5e-05	4.59522	5e-05			Ghir_A02G001890	FKB65	-2.47907	5e-05	0.510339	5e-05
Ghir_A02G006830	DOF35	2.56184	0.0004	2.15818	0.00275			Ghir_A02G005190	P2C34	-5.16665	5e-05	13.7507	5e-05
Ghir_A02G007680	EST	2.80418	5e-05	2.30908	5e-05			Ghir_A02G005810	PGLR4	-2.04415	5e-05	0.496074	5e-05
Ghir_A02G010560	C78A6	2.41325	5e-05	2.45376	5e-05			Ghir_A02G006230	CDPKB	-2.87129	0.0004	0.217619	0.0001
Ghir_A02G012080	WAK2	4.00186	0.0003	4.11333	0.00045			Ghir_A02G007670	CAO	-4.6053	5e-05	0.255565	5e-05
Ghir_A02G013750	TLC1	4.56123	5e-05	2.05052	5e-05			Ghir_A02G011710	F16P2	-2.81305	0.00155	0.178209	0.0006
Ghir_A02G016640	NAGS2	2.12296	5e-05	2.22922	5e-05			Ghir_A02G012250	PRPX	-3.149	5e-05	1.84573	5e-05
Ghir_A02G017150	LRK10	2.32974	5e-05	3.39187	5e-05			Ghir_A02G014450	SOT16	-4.02055	5e-05	0.282569	5e-05
Ghir_A02G019440	AVT3C	3.50762	0.00045	3.60031	5e-05			Ghir_A02G014950	STEP2	-2.97392	5e-05	0.477387	5e-05
Ghir_A03G002300	TLP	3.30217	0.00195	3.08471	0.00375			Ghir_A02G015070	UGT1	-2.00046	5e-05	4.44287	5e-05
Ghir_A03G003900	BLH8	2.3171	5e-05	2.29328	5e-05			Ghir_A02G015360	GH317	-2.49002	5e-05	0.423297	5e-05
Ghir_A03G005850	THIC	3.58263	0.00055	3.85478	0.0005			Ghir_A02G015430	MET1	-3.54569	5e-05	1.43701	5e-05
Ghir_A03G006070	AATP4	2.08817	5e-05	2.39365	0.00025			Ghir_A02G016380	XTH6	-2.45457	5e-05	-4.84512	5e-05
Ghir_A03G006840	21KD	4.60061	5e-05	5.18443	0.0002			Ghir_A03G000980	EXLB1	-4.52402	5e-05	8.95249	5e-05
Ghir_A03G009340	CML3	2.33333	0.003	2.64497	0.0028			Ghir_A03G001170	EF102	-2.07858	5e-05	4.81169	5e-05
Ghir_A03G012000	GEK1	2.33325	5e-05	2.31434	0.00035			Ghir_A03G001460	PTR7	-3.43959	5e-05	8.92785	5e-05
Ghir_A03G012220	DTX40	2.31868	5e-05	3.5453	0.0001			Ghir_A03G002100	DTX49	-2.27485	5e-05	1.49415	5e-05
Ghir_A03G012260	PER27	2.22058	5e-05	2.27404	5e-05			Ghir_A03G003840	NRT21	-2.08691	5e-05	0.587518	5e-05
Ghir_A03G012540	PUB21	2.25974	5e-05	3.60635	5e-05			Ghir_A03G004500	E70H1	-2.20399	5e-05	0.54376	5e-05
Ghir_A03G013770	DNJB8	5.72749	5e-05	4.48538	5e-05			Ghir_A03G007440	CYSEP	-2.34977	5e-05	2.93231	5e-05
Ghir_A03G014920	GDL53	2.36543	5e-05	2.5137	5e-05			Ghir_A03G010770	CYT10	-2.67059	0.00105	0.39428	0.0008
Ghir_A03G017070	PUB43	2.42323	5e-05	2.15592	5e-05			Ghir_A03G012630	IP5P9	-2.1129	5e-05	6.43215	5e-05
Ghir_A03G017540	7OMT	3.23192	5e-05	2.07801	5e-05			Ghir_A03G015090	PHT21	-2.00371	5e-05	1.91895	5e-05
Ghir_A03G018970	ALD1	2.61043	5e-05	3.46994	5e-05			Ghir_A03G015840	WTR11	-2.07037	5e-05	4.84265	0.0004
Ghir_A03G019070	PER2	2.2919	5e-05	2.93179	5e-05			Ghir_A03G016040	COR2	-2.2279	0.0012	0.528033	0.002
Ghir_A03G021620	PPAF2	2.70841	5e-05	2.23169	5e-05			Ghir_A03G016780	NAC83	-2.59298	5e-05	6.42111	5e-05
Ghir_A04G000500	UGT7	3.00143	5e-05	3.47466	0.00015			Ghir_A03G018160	GUN5	-3.7007	0.0076	0.0788799	0.00265
Ghir_A04G004030	PSBA	2.03939	0.0017	2.50438	0.0009			Ghir_A03G018530	AB19B	-2.59605	5e-05	0.0588522	0.00045
Ghir_A04G010830	SWT15	2.99177	5e-05	3.36725	5e-05			Ghir_A04G001770	GDL9	-3.9457	0.0013	1.00311	5e-05
Ghir_A04G011170	PRS2	2.46313	5e-05	6.47647	0.00025			Ghir_A04G004790	LOX1	-3.33261	0.00325	0.231852	0.00395
Ghir_A04G011460	MYB4	2.02563	5e-05	4.6326	5e-05			Ghir_A04G005210	PSBR	-2.34253	5e-05	0.801323	5e-05
Ghir_A04G012950	SNAK1	2.64755	0.0008	4.07297	5e-05			Ghir_A04G007140	OHP1	-3.56627	5e-05	3.12423	5e-05
Ghir_A04G013140	PER10	4.38596	5e-05	2.81217	5e-05			Ghir_A04G011140	ALL2	-3.27732	5e-05	7.62038	5e-05
Ghir_A04G016310	DCS2	2.32668	5e-05	5.35481	0.00035			Ghir_A04G011270	ERF54	-2.24557	0.0001	0.241709	0.0005
Ghir_A04G016360	P5CS	2.08636	5e-05	2.46986	5e-05			Ghir_A04G013620	DIR4	-2.1288	5e-05	1.70337	5e-05
Ghir_A05G000220	BH035	2.95998	5e-05	2.4847	5e-05			Ghir_A04G015330	HKT6	-3.44501	5e-05	0.53103	5e-05
Ghir_A05G001520	ERLL1	2.36307	5e-05	2.25806	5e-05			Ghir_A05G000300	HMA2	-3.52064	0.0007	3.54223	5e-05
Ghir_A05G002740	E1313	2.02043	5e-05	3.08385	5e-05			Ghir_A05G000480	LRK10	-3.22049	0.00125	0.289396	0.0012
Ghir_A05G005790	APT5	2.69263	5e-05	2.28872	5e-05			Ghir_A05G000610	NAS	-3.45034	5e-05	7.3112	5e-05
Ghir_A05G007470	PBL2	2.83339	5e-05	2.69537	5e-05			Ghir_A05G000630	XTH23	-3.06062	5e-05	0.20028	0.0012
Ghir_A05G007700	MLO6	3.33422	5e-05	3.03481	5e-05			Ghir_A05G002380	HSFC1	-2.00798	5e-05	3.34305	5e-05
Ghir_A05G009070	EF4L1	2.61831	0.00015	3.36208	5e-05			Ghir_A05G006290	TIC55	-2.26357	5e-05	0.426047	5e-05
Ghir_A05G010110	Y1570	2.4787	5e-05	2.86564	5e-05			Ghir_A05G007200	RBCX2	-3.12985	5e-05	1.09479	5e-05
Ghir_A05G012190	OPR11	2.26576	5e-05	2.58647	0.0001			Ghir_A05G009620	SMR4	-3.09353	0.00055	0.570569	0.00035
Ghir_A05G012300	WRK40	2.05023	5e-05	5.33418	5e-05			Ghir_A05G010000	TIP13	-2.56335	5e-05	126.473	5e-05
Ghir_A05G012490	Y3264	2.62262	0.0002	2.74162	5e-05			Ghir_A05G011940	PHL6	-3.23579	5e-05	4.18856	5e-05
Ghir_A05G014280	DNAJ	3.81864	5e-05	3.05611	5e-05			Ghir_A05G012280	PNSB1	-2.2689	0.00015	0.335109	5e-05
Ghir_A05G014360	TI11B	2.5704	0.0001	3.52853	5e-05			Ghir_A05G016800	GES	-2.49766	5e-05	0.312338	5e-05
Ghir_A05G018350	Y2060	2.09917	5e-05	2.61635	5e-05			Ghir_A05G017210	MFT	-4.06184	5e-05	0.391496	5e-05
Ghir_A05G019700	RADL6	3.00125	5e-05	2.18645	5e-05			Ghir_A05G018520	COR47	-2.24405	5e-05	-5.06645	5e-05
Ghir_A05G021110	Y1322	2.39181	5e-05	3.45263	5e-05			Ghir_A05G022030	DTX48	-3.15588	5e-05	2.01204	5e-05
Ghir_A05G023000	UGT2	2.0573	0.0009	2.99776	5e-05			Ghir_A05G022970	EXO	-2.18539	0.00035	-5.55169	5e-05
Ghir_A05G024360	CML44	4.05192	5e-05	3.92122	5e-05			Ghir_A05G023450	HIP24	-3.2051	5e-05	19.5476	5e-05
Ghir_A05G025140	LAC15	3.52178	5e-05	4.37693	5e-05			Ghir_A05G025820	OLEO5	-2.51674	0.0004	-5.35685	0.0002
Ghir_A05G026620	Y1154	2.45096	0.0004	2.70187	0.0003			Ghir_A05G027150	CRY1	-2.93886	5e-05	2.01774	5e-05
Ghir_A05G027500	STAD6	2.47145	5e-05	2.68598	5e-05			Ghir_A05G028500	CIPK2	-2.66194	5e-05	3.40092	5e-05
Ghir_A05G028000	NHL6	2.51332	5e-05	4.335	5e-05			Ghir_A05G028860	CP123	-2.37591	5e-05	9.03274	5e-05
Ghir_A05G028400	EXPA8	2.27378	5e-05	2.29315	5e-05			Ghir_A05G028940	LNK3	-2.745	5e-05	2.9565	5e-05
Ghir_A05G029570	PILS1	2.0006	5e-05	2.06525	5e-05			Ghir_A05G039690	PSAN	-3.26048	5e-05	0.361292	0.00285
Ghir_A05G029880	C7A12	2.07377	5e-05	2.61762	5e-05			Ghir_A05G040300	PIN5	-4.80035	0.0001	0.35994	5e-05
Ghir_A05G032000	C82A3	2.88354	5e-05	6.50789	0.0003			Ghir_A05G040510	PKS4	-2.75623	5e-05	0.445159	5e-05
Ghir_A05G034880	LAZY1	2.13481	5e-05	2.18813	5e-05			Ghir_A06G000590	XIAO	-2.0724	0.00125	0.273187	0.0033
Ghir_A05G035540	PRR73	3.4076	5e-05	3.30784	5e-05			Ghir_A06G000630	PPAF	-3.67473	5e-05	2.41704	5e-05
Ghir_A05G036470	WTR14	3.11546	5e-05	2.55929	5e-05			Ghir_A06G001250	AOS1	-3.14993	5e-05	1.10874	5e-05
Ghir_A05G038500	HGNAT	3.21267	0.00065	2.02672	5e-05			Ghir_A06G001290	JGB	-3.30981	5e-05	0.168667	0.0029
Ghir_A05G039330	PSY	4.38473	0.00075	3.04175	0.00315			Ghir_A06G010530	APX6	-2.23148	5e-05	1.19623	5e-05
Ghir_A05G039480	NAC81	2.22832	5e-05	2.14729	5e-05			Ghir_A06G013890	DOF53	-2.43583	5e-05	2.44705	5e-05
Ghir_A05G040110	ATL78	4.31184	5e-05	3.56255	5e-05			Ghir_A06G015320	CSCLD	-2.97382	5e-05	0.195374	5e-05
Ghir_A05G041290	PTR46	2.13717	5e-05	3.14134	5e-05			Ghir_A06G017850	RCA1	-4.06914	0.001	0.115957	0.0004
Ghir_A05G041640	WRK70	2.64679	5e-05	3.66717	5e-05			Ghir_A06G020120	BOR4	-4.3747	5e-05	3.66199	5e-05
Ghir_A05G042640	P2C51	2.35053	5e-05	2.06334	5e-05			Ghir_A07G002640	RD19B	-3.34613	5e-05	0.492114	5e-05
Ghir_A06G001370	C82A3	4.767	0.0047	3.78322	0.00385			Ghir_A07G003050	TIL	-3.97625	5e-05	5.24593	5e-05
Ghir_A06G002640	KNAP2	2.64647	5e-05	2.56765	5e-05			Ghir_A07G004080	SPX1	-2.41711	5e-05	6.29645	5e-05
Ghir_A06G005340	SRG1	4.31947	5e-05	2.68869	5e-05			Ghir_A07G005500	ACR4	-2.62799	5e-05	0.632245	5e-05
Ghir_A06G005440	3AT1	2.71996	5e-05	2.11512	0.001			Ghir_A07G005840	OFT37	-3.38785	5e-05	5.19118	5e-05
Ghir_A06G007860	PALY	2.2272	5e-05	2.21803	5e-05			Ghir_A07G007280	BEE3	-2.25565	0.00225	0.196354	0.0029
Ghir_A06G008580	ERF17	2.45307	0.01065	2.7869	0.0093			Ghir_A07G008850	NAC42	-3.93383	0.00125	0.33963	0.00025
Ghir_A06G008630	FMO1	2.59864	0.0005	2.81221	0.0003			Ghir_A07G011810	FAFL	-2.04289	5e-05	0.354903	0.0004
Ghir_A06G013900	PPO	3.01491	5e-05	2.05151	0.0001			Ghir_A07G014040	YAI5	-2.5566	5e-05	16.3283	5e-05
Ghir_A06G015700	THI42	2.85963	5e-05	2.56644	0.00015			Ghir_A07G018700	RBS	-2.32694	5e-05	0.818858	5e-05
Ghir_A06G015850	GPT2	2.79674	5e-05	3.63576	5e-05			Ghir_A07G019710	UFOG6	-2.79708	0.0001	0.3011	0.00015
Ghir_A06G019610	BBE8	3.00365	5e-05	3.83564	5e-05			Ghir_A07G020270	GRP1	-2.56464	0.0065	-5.97427	5e-05
Ghir_A06G019840	TSS	2.0637	5e-05	2.16329	5e-05			Ghir_A07G022440	D27	-5.91854	0.00035	0.907522	5e-05
Ghir_A06G021950	CRK14	2.31981	0.0001	3.04807	5e-05			Ghir_A07G023650	ENOX	-2.0154	5e-05	2.35116	5e-05
Ghir_A07G000040	GCT22	2.26037	5e-05	2.09006	5e-05			Ghir_A07G025220	YUC8	-2.13958	0.00175	0.255884	0.00025
Ghir_A07G001260	BH041	2.21499	5e-05	3.10149	5e-05			Ghir_A08G002820	XTH22	-2.69911	5e-05	-4.71349	5e-05
Ghir_A07G002160	HSP21	2.56359	5e-05	2.27845	5e-05			Ghir_A08G006160	Y1869	-2.66066	5e-05	3.73689	5e-05
Ghir_A07G002960	CHIC	2.79331	5e-05	2.32168	5e-05			Ghir_A08G007360	ALMT8	-3.82967	0.00035	0.134343	0.0067
Ghir_A07G003120	GAPN	2.70505	5e-05	4.54317	5e-05			Ghir_A08G007390	TSJT1	-2.13434	5e-05	17.79	5e-05
Ghir_A07G003550	ERF03	2.17921	5e-05	2.42042	5e-05			Ghir_A08G008740	44476	-3.05321	5e-05	19.9667	5e-05
Ghir_A07G004930	EF106	2.07698	0.0015	3.28018	5e-05			Ghir_A08G011310	SWET7	-2.11082	5e-05	0.395715	5e-05
Ghir_A07G005340	MPCP2	3.0826	5e-05	2.72928	5e-05			Ghir_A08G012080	RTNLC	-2.49077	5e-05	8.90581	5e-05
Ghir_A07G005550	PDR1	2.0849	5e-05	5.53858	5e-05			Ghir_A08G012200	HIP39	-2.40641	5e-05	2.55687	5e-05
Ghir_A07G007560	CLPB1	2.36286	5e-05	2.01944	5e-05			Ghir_A08G016350	MYB39	-2.03501	5e-05	0.725363	5e-05
Ghir_A07G007830	TYDC2	3.3502	0.00045	2.75504	0.0012			Ghir_A08G016770	IP5P2	-2.73751	5e-05	6.06244	5e-05
Ghir_A07G009620	COL9	3.60652	5e-05	2.46682	5e-05			Ghir_A08G021040	M3K18	-2.65648	5e-05	2.58695	5e-05
Ghir_A07G011040	CRCK1	2.14137	5e-05	2.39543	0.0001			Ghir_A08G021170	NSP2	-3.83435	0.00035	0.383665	5e-05
Ghir_A07G011500	BNM2A	2.01957	5e-05	3.32676	0.0001			Ghir_A08G021360	INVH	-2.558	5e-05	2.57292	5e-05
Ghir_A07G012050	ALMT2	2.51731	5e-05	2.65636	5e-05			Ghir_A08G023180	Y2910	-2.2073	5e-05	4.56472	5e-05
Ghir_A07G014410	ALMTA	3.77757	5e-05	3.01563	5e-05			Ghir_A08G025670	C3H49	-3.43626	5e-05	1.8428	5e-05
Ghir_A07G015210	SDR1	3.17019	0.0068	3.29574	0.0055			Ghir_A09G000750	WRK28	-2.6599	0.00055	0.340696	0.001
Ghir_A07G022200	MIF2	3.54798	0.00235	3.81005	0.00575			Ghir_A09G000860	PSY	-3.04265	5e-05	4.02895	5e-05
Ghir_A07G023240	PVADH	2.81451	5e-05	2.46203	5e-05			Ghir_A09G010190	LOR8	-2.71252	5e-05	17.0724	5e-05
Ghir_A07G023600	AL2B4	2.14519	0.0001	4.60721	5e-05			Ghir_A09G012630	FAB1D	-2.91091	5e-05	0.832401	5e-05
Ghir_A07G024540	SUOX	4.33367	0.0001	4.1684	0.00025			Ghir_A09G013070	CHLH	-4.04418	5e-05	1.05852	5e-05
Ghir_A08G001120	CASP3	2.74758	5e-05	2.2291	5e-05			Ghir_A09G013590	PHL5	-2.20591	5e-05	0.34237	0.0006
Ghir_A08G004590	ERF71	3.04755	0.0023	2.75402	5e-05			Ghir_A09G014600	HSFA3	-2.35315	0.0066	-5.13283	0.0001
Ghir_A08G007140	BURP5	2.19542	5e-05	2.24667	5e-05			Ghir_A09G015150	SILD	-3.04059	0.0002	1.53796	5e-05
Ghir_A08G007820	GRXS9	3.79739	0.0076	3.61151	0.00665			Ghir_A09G016740	WTR13	-4.73398	0.0008	1.59269	5e-05
Ghir_A08G008280	PME41	2.55349	0.00035	2.74781	0.00025			Ghir_A09G017330	AMYG	-3.83561	5e-05	0.656894	5e-05
Ghir_A08G009660	PRF1	2.68118	0.0071	5.66515	0.00175			Ghir_A09G019200	P2C08	-3.89336	5e-05	0.299282	5e-05
Ghir_A08G012090	Y1465	2.24354	5e-05	2.69539	5e-05			Ghir_A09G021410	MYOB2	-2.2672	5e-05	0.249808	5e-05
Ghir_A08G015150	RER4	2.65916	5e-05	2.11435	5e-05			Ghir_A09G021420	ERF62	-2.69067	5e-05	8.34462	5e-05
Ghir_A08G017030	PI5K8	2.19642	0.0031	2.54191	0.00025			Ghir_A09G023370	ELIP1	-3.13965	5e-05	3.48129	5e-05
Ghir_A08G017220	EXLB1	2.31324	5e-05	4.32813	0.00025			Ghir_A09G023880	BLUS1	-2.3622	0.00025	0.301411	0.0001
Ghir_A08G017440	EF100	2.90104	5e-05	3.60641	0.0003			Ghir_A09G024240	PGR5	-7.21304	5e-05	0.777028	5e-05
Ghir_A08G021330	ASPRX	4.37224	5e-05	3.05278	0.00035			Ghir_A09G025580	GOLS2	-2.76873	5e-05	0.53626	5e-05
Ghir_A08G022210	DHE3	2.60436	5e-05	2.60187	5e-05			Ghir_A10G001370	BH112	-2.10557	5e-05	3.63148	5e-05
Ghir_A08G024110	RHA4A	3.1143	5e-05	2.79372	5e-05			Ghir_A10G002840	TBL38	-2.40545	5e-05	15.2271	5e-05
Ghir_A09G001880	MIK2	2.9937	0.003	2.31534	0.0069			Ghir_A10G005840	PPSP2	-2.54773	5e-05	13.9747	5e-05
Ghir_A09G005560	LBD42	4.02052	5e-05	4.21032	5e-05			Ghir_A10G006110	PER7	-2.27584	5e-05	1.46471	5e-05
Ghir_A09G006580	ACCH1	2.23764	5e-05	2.36114	5e-05			Ghir_A10G006430	MES12	-3.11484	5e-05	5.72268	5e-05
Ghir_A09G010250	C94C1	2.79388	5e-05	6.23732	5e-05			Ghir_A10G008900	ZFP7	-2.21289	0.0048	0.295283	0.0036
Ghir_A09G010480	NAC90	2.81398	5e-05	3.89869	5e-05			Ghir_A10G010030	OLEO7	-2.30912	0.00445	-6.27229	0.0003
Ghir_A09G012520	LCMT1	3.8308	0.00335	3.50159	0.00305			Ghir_A10G011830	BQMT	-3.56137	5e-05	0.134642	0.00035
Ghir_A09G014080	CXE15	2.26789	0.0001	2.13753	0.00025			Ghir_A10G014950	HST	-2.32047	5e-05	0.35787	5e-05
Ghir_A09G014270	PUB23	2.28095	5e-05	3.34579	5e-05			Ghir_A10G019440	14KD	-2.11164	0.00095	2.41918	0.00105
Ghir_A09G014950	INV1	5.16024	0.00205	3.19649	0.0053			Ghir_A10G021210	FRO7	-2.98149	5e-05	3.29012	5e-05
Ghir_A09G016930	APRR7	3.41755	5e-05	3.66206	5e-05			Ghir_A10G022700	P2C37	-2.1377	5e-05	12.2163	5e-05
Ghir_A09G016990	GSTU8	2.38226	5e-05	3.12635	5e-05			Ghir_A10G022750	UVR8	-3.53843	5e-05	1.35908	5e-05
Ghir_A09G017370	CAX1	2.06604	5e-05	2.05475	5e-05			Ghir_A10G023660	DCR	-2.1543	5e-05	0.853019	5e-05
Ghir_A09G018640	ODO1	2.1812	5e-05	2.56168	5e-05			Ghir_A10G024290	AGP30	-2.01633	0.00525	0.736556	0.00505
Ghir_A09G019700	MGL	5.08351	5e-05	3.33833	5e-05			Ghir_A11G002140	EXPA7	-2.06748	5e-05	0.246555	5e-05
Ghir_A09G021620	RLF32	2.00008	0.0013	2.88267	5e-05			Ghir_A11G002550	ERF61	-3.57926	5e-05	0.89873	5e-05
Ghir_A09G022240	CHI5	2.19089	5e-05	5.0739	5e-05			Ghir_A11G002590	Y5986	-2.17733	5e-05	1.04727	5e-05
Ghir_A09G022540	PER1	3.99001	0.00335	5.52969	0.0042			Ghir_A11G002950	BAM3	-2.69425	0.0007	0.251758	0.00555
Ghir_A10G000280	BBE21	2.55162	5e-05	2.64492	5e-05			Ghir_A11G004250	MADS6	-3.449	0.0009	0.234471	0.00025
Ghir_A10G002200	HFB2A	2.17232	5e-05	5.11315	0.00015			Ghir_A11G005420	LBD39	-2.0137	5e-05	0.905628	5e-05
Ghir_A10G002370	DRPF	2.48072	0.00075	2.05271	0.00315			Ghir_A11G006840	AB25B	-2.98651	5e-05	0.614751	5e-05
Ghir_A10G003820	KAT1	2.32291	0.0002	2.0318	0.0006			Ghir_A11G007640	CDF2	-5.25578	5e-05	2.71736	5e-05
Ghir_A10G004000	TIF5A	2.64002	5e-05	4.42008	0.0005			Ghir_A11G008510	SPX3	-2.46293	5e-05	2.59254	5e-05
Ghir_A10G004270	PLA15	4.20214	0.0027	4.43235	0.00025			Ghir_A11G009820	FRO2	-2.5893	5e-05	1.9081	5e-05
Ghir_A10G004830	FAB1A	2.33943	0.0011	2.3876	0.00025			Ghir_A11G009840	PGLR	-2.69934	5e-05	12.164	5e-05
Ghir_A10G005710	CRR38	4.50108	0.00135	4.8934	0.0023			Ghir_A11G010770	MYC4	-2.45169	5e-05	0.5049	5e-05
Ghir_A10G005970	DIR1	2.34311	0.00075	2.18073	0.00065			Ghir_A11G012370	DRPE	-2.30856	5e-05	0.162266	0.00045
Ghir_A10G008340	SUT21	2.18084	0.0004	2.38902	0.00035			Ghir_A11G013200	LEA3	-3.78894	0.0002	0.552141	5e-05
Ghir_A10G011650	EPFL4	2.81001	0.00225	2.21453	0.0075			Ghir_A11G015580	CB13	-5.87287	0.00105	0.0836719	0.0074
Ghir_A10G011670	HFA6B	4.24241	5e-05	4.54768	0.0001			Ghir_A11G019710	ATB40	-2.62002	5e-05	0.44949	5e-05
Ghir_A10G014350	3AT1	2.09769	5e-05	6.52105	0.0002			Ghir_A11G019850	ST14	-2.61345	5e-05	2.23403	5e-05
Ghir_A10G014470	CHI5	2.35875	5e-05	5.19288	0.0003			Ghir_A11G021600	EPFL1	-2.82727	0.0016	0.311421	0.00215
Ghir_A10G017340	BEV1F	3.02256	5e-05	2.19669	0.00015			Ghir_A11G021790	MIZ1	-2.33715	5e-05	0.949652	5e-05
Ghir_A10G017650	SIS8	2.74985	5e-05	3.22406	5e-05			Ghir_A11G023790	Y5279	-2.03195	5e-05	5.36513	5e-05
Ghir_A10G017930	MYB78	2.47776	0.00645	3.82136	0.0003			Ghir_A11G026010	EXP15	-2.43484	5e-05	1.23979	5e-05
Ghir_A10G019510	ALKH	3.21466	5e-05	3.4018	5e-05			Ghir_A11G026120	40G2	-2.32365	0.0009	0.18499	0.00045
Ghir_A10G021880	ASP	3.6624	0.00285	5.84385	0.00425			Ghir_A11G026980	PSBW	-2.6535	5e-05	4.48981	5e-05
Ghir_A10G023180	UGT8	2.01034	5e-05	3.63394	5e-05			Ghir_A11G028450	U603	-2.15809	5e-05	0.581318	5e-05
Ghir_A10G024010	ELF4	5.82065	0.0003	5.47536	0.00055			Ghir_A11G029200	PME41	-2.55232	5e-05	0.293735	5e-05
Ghir_A10G024040	ACCR3	2.47725	5e-05	4.09304	5e-05			Ghir_A11G029320	WAKLQ	-3.53555	5e-05	21.2751	5e-05
Ghir_A10G024050	C71A1	2.26267	5e-05	4.19306	5e-05			Ghir_A11G034370	NHL1	-2.96801	5e-05	0.453005	0.001
Ghir_A11G001490	CNBL4	2.25983	5e-05	3.16879	5e-05			Ghir_A11G034860	KUA1	-2.89612	5e-05	9.56843	5e-05
Ghir_A11G004890	MPK7	2.46437	5e-05	2.32903	5e-05			Ghir_A12G000840	GRXS9	-4.46926	5e-05	2.57176	5e-05
Ghir_A11G004930	RADL3	2.97521	0.00055	2.8006	0.00105			Ghir_A12G001090	TSPO	-3.83897	0.0003	0.740836	5e-05
Ghir_A11G007440	TBL22	2.6055	0.0037	3.02851	0.0021			Ghir_A12G001990	ZAT10	-3.04109	5e-05	3.08825	5e-05
Ghir_A11G010100	GDL61	2.80314	0.0001	2.02508	0.00505			Ghir_A12G006800	UFOG5	-3.3734	0.00125	0.263523	0.0004
Ghir_A11G011620	PP178	2.30571	5e-05	2.59969	5e-05			Ghir_A12G007930	GLD27	-3.65169	5e-05	2.41663	5e-05
Ghir_A11G012960	IPT3	2.60608	5e-05	2.22554	5e-05			Ghir_A12G008500	XTHB	-3.02585	5e-05	0.631378	5e-05
Ghir_A11G013610	HPI	2.43716	5e-05	2.21591	5e-05			Ghir_A12G009390	RAB7	-2.03615	0.0031	0.177885	0.00205
Ghir_A11G016210	ACCO	2.31069	5e-05	2.4754	5e-05			Ghir_A12G011160	SPXM3	-3.32619	5e-05	3.28579	5e-05
Ghir_A11G016820	RGP1	2.85621	5e-05	2.69591	5e-05			Ghir_A12G017500	CDF1	-4.94228	5e-05	0.481277	5e-05
Ghir_A11G017800	GLNA	2.16438	5e-05	2.04753	5e-05			Ghir_A12G017550	RNS1	-2.74379	5e-05	1.13326	5e-05
Ghir_A11G022990	HLS1L	3.22686	5e-05	4.07807	5e-05			Ghir_A12G019880	BT2	-2.71883	0.0004	0.167356	0.00065
Ghir_A11G024410	C7A10	3.77903	0.00445	3.90707	0.006			Ghir_A12G022630	LIL31	-3.11504	5e-05	0.474528	0.0004
Ghir_A11G024900	CCX1	2.08228	0.00045	2.34904	5e-05			Ghir_A12G023110	SAU36	-2.08567	0.00065	0.384571	0.0008
Ghir_A11G025100	PCO2	3.36296	5e-05	3.13259	5e-05			Ghir_A12G026170	P2C57	-2.59035	5e-05	0.623442	5e-05
Ghir_A11G027050	WRK74	2.61807	5e-05	2.85015	5e-05			Ghir_A12G026410	TPP7	-2.1233	5e-05	1.95534	5e-05
Ghir_A11G029380	DNJB6	3.67883	5e-05	3.62331	5e-05			Ghir_A12G026840	BCH	-2.06343	5e-05	13.9541	5e-05
Ghir_A11G030930	DYL	2.03731	0.0029	2.03073	0.00325			Ghir_A12G028130	PP301	-4.63263	5e-05	0.445353	0.0001
Ghir_A11G031530	Y3148	3.89867	5e-05	3.48974	5e-05			Ghir_A12G028640	PUB19	-3.67587	0.0006	4.63916	5e-05
Ghir_A12G002190	RPKL	2.88857	0.00075	2.85327	0.00065			Ghir_A12G028790	APAG	-2.84188	5e-05	0.99539	5e-05
Ghir_A12G005440	BEE3	3.89708	5e-05	2.74683	5e-05			Ghir_A13G003910	Y5713	-2.02423	5e-05	0.643804	5e-05
Ghir_A12G008440	GCL1	2.50764	5e-05	3.47885	0.0001			Ghir_A13G005560	HYES	-2.1232	5e-05	4.27119	5e-05
Ghir_A12G009480	MTDH	2.17235	5e-05	7.23806	5e-05			Ghir_A13G012020	TRXF2	-5.0188	5e-05	2.07907	5e-05
Ghir_A12G011250	P2A13	2.37539	5e-05	2.39194	5e-05			Ghir_A13G012100	WSD1	-2.70175	0.00055	0.0829344	0.00175
Ghir_A12G014970	BH162	2.52783	0.00135	3.2469	0.00045			Ghir_A13G013180	44472	-4.89517	0.0015	-5.01267	5e-05
Ghir_A12G016160	HIP20	2.07475	5e-05	2.33298	5e-05			Ghir_A13G016170	DIOX3	-3.2036	0.0012	7.22307	5e-05
Ghir_A12G016370	ADO3	4.21265	5e-05	4.43829	5e-05			Ghir_A13G018830	BH149	-2.67831	0.0029	1.2599	5e-05
Ghir_A12G016430	Y4597	2.23542	0.0005	2.0292	0.00165			Ghir_A13G021720	PNSB3	-2.89182	5e-05	0.417545	0.00605
Ghir_A12G018860	RGA3	2.15665	5e-05	3.64602	0.0001			Ghir_A13G022450	IQM2	-2.70072	5e-05	0.37822	0.0001
Ghir_A12G018930	EXPA1	2.28132	0.0026	2.12919	0.00375			Ghir_A13G022840	DR100	-2.87858	5e-05	0.726545	5e-05
Ghir_A12G019880	BT2	5.85222	5e-05	4.40318	5e-05			Ghir_D01G001010	EGY3	-2.87455	5e-05	0.821158	5e-05
Ghir_A12G020430	SWT13	2.49463	0.0002	2.21797	0.0039			Ghir_D01G001750	ERF53	-2.58945	0.00015	0.264221	5e-05
Ghir_A12G020810	DHE2	2.13313	0.001	2.11818	0.0005			Ghir_D01G001930	C3H2	-3.15811	0.00035	0.391043	0.0003
Ghir_A12G021380	ABAH1	2.07684	5e-05	2.33586	0.00035			Ghir_D01G005370	ATB52	-2.1716	0.00095	0.666925	0.0009
Ghir_A12G021690	CSCL1	3.59834	5e-05	4.36479	5e-05			Ghir_D01G007210	U73C5	-2.2888	5e-05	0.921177	5e-05
Ghir_A12G021750	RPM1	2.02553	0.00235	2.19269	0.0068			Ghir_D01G008320	C7D55	-2.39597	0.00755	0.150179	0.0054
Ghir_A12G023820	DRE1F	4.21314	5e-05	2.96602	0.0004			Ghir_D01G009330	NPH3	-6.28465	0.00195	0.441967	5e-05
Ghir_A12G023980	OSL3	3.4407	5e-05	3.76974	5e-05			Ghir_D01G012450	CER2	-2.8278	5e-05	0.567205	5e-05
Ghir_A12G027490	DHSO	2.43996	0.0005	2.66634	0.0002			Ghir_D01G014070	PRP3	-2.09489	5e-05	1.34092	5e-05
Ghir_A12G028850	AOX1A	2.26104	5e-05	3.36878	5e-05			Ghir_D01G016670	XERIC	-2.46796	0.00035	0.280409	5e-05
Ghir_A13G000270	ARR8	2.34064	5e-05	2.19233	0.0006			Ghir_D01G017090	AQPA	-3.07868	5e-05	2.84189	5e-05
Ghir_A13G001050	PTR14	2.14753	5e-05	4.5639	5e-05			Ghir_D01G018960	CSPLU	-2.85833	0.00145	0.210091	0.0007
Ghir_A13G003810	EF109	2.25548	5e-05	5.87431	0.0001			Ghir_D01G019450	TPPD	-2.63064	5e-05	1.8042	5e-05
Ghir_A13G004540	CCD41	3.52903	0.00045	2.78988	0.00445			Ghir_D01G019780	CML44	-2.49878	5e-05	0.564093	0.00015
Ghir_A13G006510	GLR32	2.1612	5e-05	2.04936	5e-05			Ghir_D01G023700	CAX3	-2.25605	5e-05	-5.17914	0.0002
Ghir_A13G010630	SIRP1	2.41321	0.0059	6.64284	5e-05			Ghir_D02G000720	U74F2	-5.02197	5e-05	1.10872	5e-05
Ghir_A13G013800	NUD10	2.85692	5e-05	2.82218	5e-05			Ghir_D02G002160	XTH2	-2.68443	0.0029	-4.43756	5e-05
Ghir_A13G013840	C71DA	3.23949	0.006	3.63033	0.0069			Ghir_D02G004350	PP1	-3.13717	5e-05	9.55759	5e-05
Ghir_A13G013870	KCO1	4.23421	5e-05	3.42296	0.0004			Ghir_D02G011760	ATB13	-2.31859	5e-05	2.53781	5e-05
Ghir_A13G016220	GSTXA	3.19777	0.0085	5.86267	0.0026			Ghir_D02G014430	BH111	-2.68399	5e-05	21.8904	5e-05
Ghir_A13G017540	NAC47	2.00606	5e-05	2.18163	5e-05			Ghir_D02G014730	PME6	-3.18581	5e-05	11.6446	5e-05
Ghir_A13G017850	THA1	2.14528	5e-05	2.86452	5e-05			Ghir_D02G019190	Y2913	-2.13054	5e-05	3.39805	5e-05
Ghir_A13G018610	NFYB4	2.73906	0.0012	4.26334	0.0001			Ghir_D02G019360	MIP1B	-3.4949	5e-05	0.572437	5e-05
Ghir_A13G019240	CNG14	2.16813	5e-05	2.17792	5e-05			Ghir_D02G021490	BH084	-3.30778	0.0054	0.208141	0.00415
Ghir_D01G002860	ARR2	2.19729	5e-05	2.23595	5e-05			Ghir_D02G022290	Y1457	-3.63521	0.0016	0.152717	0.0004
Ghir_D01G003490	F6H1	3.56511	5e-05	4.41198	0.0002			Ghir_D02G022570	FER1	-2.72986	5e-05	1.29433	5e-05
Ghir_D01G003670	VQ1	4.23765	5e-05	2.21676	0.0034			Ghir_D02G022930	CS3	-2.15245	5e-05	1.46349	5e-05
Ghir_D01G003720	G2OX1	2.12389	5e-05	4.25093	0.00015			Ghir_D02G022970	SFH3	-3.18809	0.00115	0.117519	0.00095
Ghir_D01G005160	NCL	2.26908	5e-05	2.3628	5e-05			Ghir_D02G024020	EXLA1	-2.07158	5e-05	0.600192	5e-05
Ghir_D01G005890	CHER1	2.02249	5e-05	2.15699	5e-05			Ghir_D02G024170	NLP2	-2.03631	5e-05	8.37332	5e-05
Ghir_D01G006050	NAC72	2.94273	5e-05	4.13023	5e-05			Ghir_D03G003200	XTH6	-2.07476	5e-05	0.172662	0.0002
Ghir_D01G006950	THI41	3.35803	5e-05	3.35286	5e-05			Ghir_D03G004570	AB1K8	-3.01298	5e-05	0.974848	5e-05
Ghir_D01G007130	CHL	3.40614	5e-05	2.32145	0.00075			Ghir_D03G006900	PDR1	-2.57007	5e-05	0.233445	5e-05
Ghir_D01G007740	STGL4	2.36761	5e-05	2.26563	5e-05			Ghir_D03G011190	PMEI4	-3.41614	5e-05	2.32681	5e-05
Ghir_D01G008270	C71D8	2.26185	5e-05	3.89093	0.00025			Ghir_D03G013260	COPT6	-2.14322	5e-05	5.21218	5e-05
Ghir_D01G014640	U74B1	2.27516	5e-05	3.1566	5e-05			Ghir_D03G014290	HACD2	-2.76236	5e-05	27.1964	5e-05
Ghir_D01G019680	LRKS5	2.20429	5e-05	2.24964	0.0003			Ghir_D03G016460	PIP12	-2.29735	5e-05	43.5246	5e-05
Ghir_D01G019760	AAP3	2.55174	0.00015	2.23832	0.00165			Ghir_D03G018170	SEOB	-4.81384	5e-05	1.90999	5e-05
Ghir_D01G020920	DCS3	3.44114	5e-05	4.85073	0.0001			Ghir_D03G018390	PTR14	-2.74647	5e-05	9.87917	5e-05
Ghir_D01G021160	SILD	2.69089	5e-05	4.23103	5e-05			Ghir_D04G000070	LRKS7	-4.05738	0.00125	0.306955	0.0001
Ghir_D01G023820	AMT2	2.54257	5e-05	2.02004	5e-05			Ghir_D04G001360	EXPA8	-2.56962	5e-05	0.625045	5e-05
Ghir_D02G000190	PILS6	3.12482	5e-05	2.47169	0.0002			Ghir_D04G002890	ATL78	-2.36474	5e-05	1.9958	5e-05
Ghir_D02G002220	UGT1	2.16556	5e-05	4.95068	5e-05			Ghir_D04G005680	WTR18	-2.15587	5e-05	22.0799	5e-05
Ghir_D02G004050	CIPK7	2.61095	5e-05	2.51632	5e-05			Ghir_D04G006900	HERC5	-5.37236	5e-05	1.51802	5e-05
Ghir_D02G004310	ERF98	2.57106	0.00955	3.63455	0.0037			Ghir_D04G008970	GLR27	-2.04932	0.0001	0.578463	5e-05
Ghir_D02G004790	FL3H3	2.68664	0.00225	2.40683	0.0053			Ghir_D04G011040	PPA22	-2.05277	5e-05	1.42021	5e-05
Ghir_D02G005570	PRU1	4.71242	0.0006	3.1841	5e-05			Ghir_D04G011670	ATL32	-4.54213	0.0001	0.465791	5e-05
Ghir_D02G006410	LEA29	3.58833	5e-05	2.86661	0.0001			Ghir_D04G013910	SQD2	-2.19781	5e-05	1.12237	5e-05
Ghir_D02G007330	ADH1	4.04144	5e-05	4.67045	5e-05			Ghir_D04G014550	TBL35	-2.26336	5e-05	0.38806	5e-05
Ghir_D02G008190	WTR32	3.21671	5e-05	3.38794	5e-05			Ghir_D04G015910	MIP1A	-3.04134	5e-05	1.205	5e-05
Ghir_D02G008290	NIA	2.78928	5e-05	2.27841	5e-05			Ghir_D04G017850	SPE1	-2.06977	5e-05	1.0735	5e-05
Ghir_D02G009420	PLP2	2.36276	5e-05	5.72666	0.00015			Ghir_D04G018290	FMO1	-3.40492	0.0002	1.69672	0.0001
Ghir_D02G011920	RAV1	2.06157	5e-05	4.25338	0.0003			Ghir_D04G019870	C78A5	-2.44409	5e-05	0.499834	5e-05
Ghir_D02G014980	Y1648	2.25805	5e-05	5.31911	0.0001			Ghir_D05G001020	AP2L1	-3.07731	0.00645	0.129664	0.00475
Ghir_D02G016660	HEBP2	4.80891	0.0022	3.13371	0.0034			Ghir_D05G001570	ANTR6	-2.65747	5e-05	3.03217	5e-05
Ghir_D02G017570	KCS6	3.31214	0.0007	4.83374	0.00015			Ghir_D05G001990	DYL	-2.64863	5e-05	1.47165	5e-05
Ghir_D02G018140	TIF9	2.13715	0.001	4.68853	5e-05			Ghir_D05G002420	NAKR2	-2.80334	5e-05	4.22358	5e-05
Ghir_D02G018730	RMA1	2.35351	0.0001	2.94008	5e-05			Ghir_D05G006140	GAPN	-2.02677	5e-05	6.54893	5e-05
Ghir_D02G019740	GEML4	3.01031	0.0056	2.85525	0.00685			Ghir_D05G007260	ORG2	-2.88067	5e-05	0.217876	0.00015
Ghir_D02G021310	BAHD1	2.27911	0.00065	3.28794	0.0001			Ghir_D05G008310	PER60	-2.70007	5e-05	0.455488	5e-05
Ghir_D02G022900	GLGL3	2.5957	5e-05	2.2522	5e-05			Ghir_D05G008480	PARP3	-2.22816	5e-05	1.57289	5e-05
Ghir_D02G023930	LHTL8	2.25803	0.00025	2.96542	5e-05			Ghir_D05G008500	SAP3	-2.16274	5e-05	39.9883	5e-05
Ghir_D03G000080	PILS7	2.45974	5e-05	4.11064	5e-05			Ghir_D05G011000	SKOR	-2.34558	5e-05	5.14292	5e-05
Ghir_D03G002650	C81E8	4.21792	0.0026	4.16856	0.0026			Ghir_D05G012820	GLYK	-2.26756	5e-05	4.33813	5e-05
Ghir_D03G004390	DNJ20	2.10625	5e-05	4.28883	0.0002			Ghir_D05G019060	SNAK2	-3.80605	5e-05	0.202002	0.00165
Ghir_D03G004420	ASO	2.15754	5e-05	2.1686	5e-05			Ghir_D05G020020	JAC1	-2.72413	5e-05	0.293332	5e-05
Ghir_D03G004830	ABR1	3.48996	5e-05	2.38733	5e-05			Ghir_D05G020770	AI5L5	-2.39528	5e-05	7.41313	5e-05
Ghir_D03G011890	INVB	2.50589	0.0008	4.05016	0.00015			Ghir_D05G022880	EXO	-3.00509	5e-05	-7.04175	5e-05
Ghir_D03G013420	PCL1	3.7701	5e-05	3.68064	5e-05			Ghir_D05G022970	ABHD6	-3.27795	5e-05	0.4204	0.0001
Ghir_D03G015090	NRT23	3.22252	5e-05	2.71237	5e-05			Ghir_D05G023310	SUT3	-5.63106	5e-05	6.20505	5e-05
Ghir_D03G015340	ZFP34	3.05361	5e-05	2.57694	5e-05			Ghir_D05G023740	WTR31	-2.53608	5e-05	20.9994	5e-05
Ghir_D03G016690	TLP	2.47428	5e-05	6.17594	0.0003			Ghir_D05G024080	NRAM5	-2.15255	5e-05	2.54201	5e-05
Ghir_D03G018170	SEOB	3.71907	5e-05	2.32759	5e-05			Ghir_D05G028710	LNK2	-8.06365	5e-05	0.517219	5e-05
Ghir_D03G018950	4CLL6	3.0319	5e-05	2.84147	5e-05			Ghir_D05G030730	FB129	-2.30208	5e-05	0.495978	5e-05
Ghir_D04G002580	KTI2	2.88603	0.00315	3.83156	0.001			Ghir_D06G000230	HXK2	-2.17063	5e-05	1.18091	5e-05
Ghir_D04G003190	LERK3	2.24921	0.0001	2.0871	0.0001			Ghir_D06G006770	PP395	-4.20247	5e-05	0.878106	5e-05
Ghir_D04G006390	AB16G	2.65006	0.0029	2.89667	0.0022			Ghir_D06G007280	PME53	-2.48368	5e-05	0.459301	5e-05
Ghir_D04G006810	RHC2A	2.57135	5e-05	4.61462	0.0002			Ghir_D06G009420	GRXC6	-2.42489	0.0022	0.660014	0.0026
Ghir_D04G011250	GLGB1	2.73286	5e-05	2.2818	5e-05			Ghir_D06G010990	SPSA1	-2.21641	5e-05	0.520241	5e-05
Ghir_D04G011320	ERF24	2.59068	0.0002	2.23412	0.0006			Ghir_D06G013960	SCP31	-2.11427	5e-05	0.547182	5e-05
Ghir_D04G014190	DOGL4	3.55947	0.0023	3.03084	0.0041			Ghir_D06G015630	NCED5	-3.68999	5e-05	0.830094	5e-05
Ghir_D04G015290	P2C58	2.03083	0.003	2.34889	0.0023			Ghir_D06G018780	RCA2	-3.98926	0.00215	0.276106	0.0002
Ghir_D04G015520	PRS2	3.07985	5e-05	6.79614	5e-05			Ghir_D06G020330	PME24	-2.21789	0.0026	0.100281	0.0029
Ghir_D04G015630	PORA	2.13689	0.0002	2.24546	0.00015			Ghir_D06G023490	PUB33	-2.00495	5e-05	0.627457	0.0002
Ghir_D04G015640	ERF54	2.74227	5e-05	2.99138	5e-05			Ghir_D07G001200	PAO5	-2.5154	0.00525	0.0659547	0.0104
Ghir_D04G016690	LNK1	2.56883	5e-05	2.86836	5e-05			Ghir_D07G002530	MTEF9	-2.29002	5e-05	0.731317	0.0002
Ghir_D04G017670	CRU4	2.08223	5e-05	2.02349	5e-05			Ghir_D07G003140	CIPK6	-2.27719	5e-05	0.401527	5e-05
Ghir_D04G018730	HBL1	4.43125	5e-05	4.83252	5e-05			Ghir_D07G004800	QWRF7	-3.23792	0.00335	0.0554941	0.00265
Ghir_D04G019990	ITN1	4.6343	5e-05	2.96912	5e-05			Ghir_D07G008660	SPA15	-2.01912	5e-05	3.47125	5e-05
Ghir_D05G002040	NO93	3.35702	0.00015	5.11391	5e-05			Ghir_D07G011790	CER1	-2.37135	5e-05	0.958072	5e-05
Ghir_D05G005220	RD22	2.50937	5e-05	5.52792	5e-05			Ghir_D07G012760	CIPK3	-2.02026	5e-05	5.11853	5e-05
Ghir_D05G007790	ARFD	3.18745	5e-05	2.33424	5e-05			Ghir_D07G021590	AFP3	-2.69624	5e-05	0.272895	5e-05
Ghir_D05G008640	DRE1B	2.56063	0.0011	4.27052	5e-05			Ghir_D07G023080	SCR	-2.10276	0.00135	0.374917	0.0032
Ghir_D05G009070	CAX3	4.39713	5e-05	3.48355	5e-05			Ghir_D07G023770	AOR	-2.25819	5e-05	1.0042	5e-05
Ghir_D05G010490	ATCA7	2.79994	5e-05	2.51889	0.00065			Ghir_D08G000650	PTR1	-2.25325	5e-05	2.84631	5e-05
Ghir_D05G013420	APG2	3.6949	0.0027	5.31191	0.0026			Ghir_D08G005880	BH086	-2.48407	0.0006	0.297796	0.00045
Ghir_D05G014240	Y1725	2.781	0.00135	4.01967	5e-05			Ghir_D08G006650	DMR6	-2.46399	0.0075	0.201541	0.0101
Ghir_D05G014850	CSCLD	2.32031	5e-05	4.46353	5e-05			Ghir_D08G007420	ALMTC	-4.09406	5e-05	1.18758	5e-05
Ghir_D05G015970	CLE6	3.47167	0.0001	2.42482	0.00145			Ghir_D08G007670	LE14B	-2.30797	0.00225	0.623944	0.0029
Ghir_D05G016100	PTI5	2.87916	0.0002	2.56328	0.0026			Ghir_D08G008790	HKT1	-3.29889	5e-05	9.61037	5e-05
Ghir_D05G016650	GES	2.64857	5e-05	5.5693	5e-05			Ghir_D08G013190	NFYB5	-2.84965	5e-05	2.17025	5e-05
Ghir_D05G017180	TAUE2	2.71986	0.0001	4.15245	5e-05			Ghir_D08G014200	STR4	-2.95417	5e-05	0.180604	5e-05
Ghir_D05G020110	PR5	2.01513	5e-05	2.07367	0.0001			Ghir_D08G016460	PAE8	-3.33436	5e-05	3.71356	5e-05
Ghir_D05G022090	PGML1	2.17732	5e-05	3.18604	5e-05			Ghir_D08G017200	MYB93	-2.10584	0.0014	0.528498	0.0009
Ghir_D05G022630	DLO2	3.14385	5e-05	3.26448	5e-05			Ghir_D08G018320	NUDT8	-2.21136	5e-05	12.6171	5e-05
Ghir_D05G024350	CHS2	2.68143	5e-05	2.53619	0.00065			Ghir_D08G021750	XTH31	-2.22316	5e-05	2.09238	5e-05
Ghir_D05G025020	GIGAN	3.60395	5e-05	3.63059	5e-05			Ghir_D08G022730	CCP31	-2.30407	5e-05	1.69684	5e-05
Ghir_D05G025180	LAC14	2.94991	5e-05	6.9744	5e-05			Ghir_D08G025870	ATL11	-2.77114	5e-05	5.48738	5e-05
Ghir_D05G026330	RAD	2.64528	0.00045	2.60737	0.00075			Ghir_D08G027150	DREB3	-2.31481	0.00025	0.520915	0.0001
Ghir_D05G026360	RADL1	2.20664	0.0001	2.32648	0.00025			Ghir_D09G000450	GAO1B	-2.93288	5e-05	0.737183	5e-05
Ghir_D05G027760	LAC14	2.9071	5e-05	5.77884	0.00025			Ghir_D09G006430	LEUC	-2.80558	5e-05	0.660321	5e-05
Ghir_D05G028020	NHL6	2.18397	5e-05	6.16412	0.00025			Ghir_D09G007240	CIPK1	-2.28988	5e-05	8.5396	5e-05
Ghir_D05G037080	CARP1	3.91104	0.00585	3.68506	0.00645			Ghir_D09G009850	Y4276	-2.01531	5e-05	4.59656	5e-05
Ghir_D05G037720	GDL40	2.44806	5e-05	2.51938	5e-05			Ghir_D09G011470	Y2766	-3.5318	5e-05	0.17345	0.01145
Ghir_D06G001120	CP74	2.39796	5e-05	2.42117	5e-05			Ghir_D09G011550	PP379	-3.43364	0.00155	0.210237	0.0003
Ghir_D06G001760	EPS1	2.05589	0.00035	2.54208	0.0002			Ghir_D09G012970	C93A1	-2.38576	5e-05	1.63484	5e-05
Ghir_D06G001940	CAES	2.93304	0.0045	3.276	0.0031			Ghir_D09G015320	PIP21	-3.19496	5e-05	48.9853	5e-05
Ghir_D06G003820	TPPD	2.01608	0.00615	3.06271	0.0006			Ghir_D09G016420	RVE8	-3.39306	5e-05	2.6443	5e-05
Ghir_D06G008940	PME12	2.86041	0.00025	2.51306	0.0018			Ghir_D09G018570	BCH1	-2.38148	5e-05	0.264804	0.0012
Ghir_D06G009150	MSL10	2.30282	0.00015	2.10301	0.00115			Ghir_D09G019120	SSG1	-9.21792	5e-05	2.7995	5e-05
Ghir_D06G010840	SHN3	3.38882	0.0001	2.44548	0.0001			Ghir_D09G019870	INVA	-2.52772	5e-05	0.115087	5e-05
Ghir_D06G012240	JMJ30	2.55371	5e-05	2.43034	5e-05			Ghir_D09G021370	FLS2	-3.35115	0.001	0.298096	0.00025
Ghir_D06G013760	ENT3	2.02925	0.00115	2.65921	5e-05			Ghir_D09G021380	BBX24	-3.31946	5e-05	4.88897	5e-05
Ghir_D06G013850	NDA1	2.78215	5e-05	3.22578	0.0003			Ghir_D09G021680	CAS	-2.5803	5e-05	0.362437	5e-05
Ghir_D06G018270	PYL6	4.19845	5e-05	3.41118	5e-05			Ghir_D09G024340	MARD1	-4.7323	0.00385	0.877265	5e-05
Ghir_D06G020020	MCA9	3.35917	0.00015	2.78108	0.00185			Ghir_D09G024790	BOR2	-2.51	5e-05	3.15048	5e-05
Ghir_D06G020250	RNS1	2.5831	5e-05	4.88775	5e-05			Ghir_D10G002650	MY102	-2.91439	0.00085	0.112283	0.001
Ghir_D06G020870	ZFP1	2.64243	5e-05	2.11587	5e-05			Ghir_D10G003660	BH030	-2.77743	5e-05	59.5495	5e-05
Ghir_D06G022170	G2OX	2.17126	5e-05	2.50954	5e-05			Ghir_D10G005130	ZIP10	-2.36226	5e-05	7.94804	5e-05
Ghir_D06G022520	YO059	2.31234	5e-05	4.96809	0.0002			Ghir_D10G009660	C84A1	-3.38866	5e-05	0.351706	5e-05
Ghir_D07G000940	DTX51	2.57836	0.0002	3.01154	5e-05			Ghir_D10G010200	PLP1	-2.35856	5e-05	2.44794	5e-05
Ghir_D07G001140	ACCO1	2.40986	5e-05	2.915	5e-05			Ghir_D10G010710	DTX27	-4.04404	0.0063	0.0503714	0.00265
Ghir_D07G005350	MPCP3	2.34299	5e-05	3.50102	5e-05			Ghir_D10G012460	BBE8	-3.67014	5e-05	1.04737	5e-05
Ghir_D07G005440	SWT10	2.01031	0.00175	3.16099	0.0001			Ghir_D10G013970	INT1	-2.29839	5e-05	14.9913	5e-05
Ghir_D07G005600	AB44G	2.01476	5e-05	2.86322	5e-05			Ghir_D10G015050	C71A1	-2.61705	5e-05	0.79023	5e-05
Ghir_D07G009390	ACCO3	3.06795	5e-05	3.56898	0.00015			Ghir_D10G016570	DCTP1	-2.7498	5e-05	2.26733	5e-05
Ghir_D07G009700	COL10	4.45522	0.00055	2.30551	5e-05			Ghir_D10G017820	CSPL5	-2.3555	5e-05	2.21877	5e-05
Ghir_D07G010090	C82G1	2.07274	0.0012	2.61799	0.00015			Ghir_D10G018270	LEA5D	-2.44151	5e-05	6.95376	5e-05
Ghir_D07G014380	YC22	2.07724	5e-05	2.22961	5e-05			Ghir_D10G019990	ARR17	-2.96275	5e-05	1.12475	5e-05
Ghir_D07G014780	GL113	2.21527	0.0009	5.46868	0.0002			Ghir_D10G021020	AIR1	-3.20725	0.00065	3.00127	0.00155
Ghir_D07G020850	C79D4	3.10113	5e-05	2.11474	5e-05			Ghir_D10G021110	ERLL2	-2.66503	5e-05	2.01885	5e-05
Ghir_D07G021450	CRR55	4.43685	5e-05	2.62266	5e-05			Ghir_D10G025010	PCS1L	-2.54859	5e-05	0.214281	0.00175
Ghir_D07G021520	BH062	2.04178	0.0043	2.29479	0.0016			Ghir_D10G025490	CUCM1	-2.57528	5e-05	0.50526	5e-05
Ghir_D07G024550	CLCB	2.70816	5e-05	2.67298	5e-05			Ghir_D11G000280	PPA17	-2.40366	5e-05	1.43282	5e-05
Ghir_D07G024840	LVR	2.03958	5e-05	3.80188	0.0003			Ghir_D11G000750	OLE16	-3.56434	0.0001	0.762935	5e-05
Ghir_D08G002910	DXS2	2.62467	5e-05	4.66662	5e-05			Ghir_D11G001030	CET1	-2.59216	0.00635	0.203908	0.00565
Ghir_D08G002920	DXS2	2.3143	0.0004	4.10922	0.0001			Ghir_D11G001340	SLAH3	-2.17424	5e-05	3.83103	5e-05
Ghir_D08G004140	CRK11	2.36694	0.0024	2.89168	0.0007			Ghir_D11G003890	DOF54	-2.12844	5e-05	2.3403	5e-05
Ghir_D08G004440	AAE11	2.54331	5e-05	2.5556	0.0005			Ghir_D11G005190	LIP	-2.32669	5e-05	0.705478	5e-05
Ghir_D08G004790	RAP23	2.74262	0.0043	3.29641	0.0004			Ghir_D11G006990	CCB1	-2.31222	0.00025	0.344992	0.0002
Ghir_D08G007190	BURPH	2.84276	5e-05	2.63812	5e-05			Ghir_D11G007600	CML45	-3.03786	5e-05	7.58994	5e-05
Ghir_D08G008340	PME7	2.21516	5e-05	2.62657	5e-05			Ghir_D11G007620	NC100	-2.46671	5e-05	9.93665	5e-05
Ghir_D08G008410	RLK1	2.16947	5e-05	2.60439	0.00045			Ghir_D11G009870	1A1C	-3.20595	0.00165	0.159132	0.0005
Ghir_D08G009420	TPS11	2.01411	0.0002	2.06868	5e-05			Ghir_D11G009930	LEA14	-3.02714	5e-05	-6.36007	0.00015
Ghir_D08G011360	HS22C	2.02802	0.00025	2.47988	5e-05			Ghir_D11G012060	PRP1	-2.38032	5e-05	1.46477	5e-05
Ghir_D08G014860	C86A8	2.10351	5e-05	2.54354	5e-05			Ghir_D11G018910	BBX19	-6.33927	5e-05	0.556691	5e-05
Ghir_D08G015350	EXPB2	2.43558	5e-05	2.79065	5e-05			Ghir_D11G019970	PSBO	-2.593	5e-05	0.573819	5e-05
Ghir_D08G015530	ERF99	3.04221	0.0038	2.81231	0.0063			Ghir_D11G022010	BH025	-2.2633	5e-05	1.15303	0.0003
Ghir_D08G018040	EXLB1	5.88835	5e-05	5.6236	5e-05			Ghir_D11G024710	NFD4	-2.91312	5e-05	0.2986	5e-05
Ghir_D08G019750	LOR4	2.72512	5e-05	2.01396	0.00045			Ghir_D11G025000	PER28	-4.28015	5e-05	0.640868	5e-05
Ghir_D08G021710	HIP3	2.14559	0.00015	2.93995	0.00035			Ghir_D11G027040	PPCK1	-2.54513	5e-05	23.2901	5e-05
Ghir_D08G025680	CER3	2.4805	0.0011	3.577	0.00015			Ghir_D11G031010	DSC1	-3.44748	0.0001	0.263955	5e-05
Ghir_D09G001750	PPA29	2.87879	5e-05	2.13921	0.0003			Ghir_D11G031420	SPA3	-3.11326	5e-05	0.542931	5e-05
Ghir_D09G002130	PTR6	2.67161	5e-05	2.15525	5e-05			Ghir_D11G035650	C76A2	-2.09558	5e-05	0.727154	0.00025
Ghir_D09G002970	DJC76	3.01109	0.0009	2.05851	0.00755			Ghir_D12G001500	LNK1	-5.02441	5e-05	2.56247	5e-05
Ghir_D09G004350	DRE1D	2.20832	5e-05	4.89222	0.00055			Ghir_D12G004270	AOS3	-2.15056	5e-05	5.83899	5e-05
Ghir_D09G007060	E13B	2.7064	5e-05	3.95639	5e-05			Ghir_D12G005140	2MMP	-2.84764	0.0051	0.293559	0.0058
Ghir_D09G007080	BZIP1	2.02438	5e-05	3.18731	5e-05			Ghir_D12G006050	Y1607	-2.13067	5e-05	4.62935	0.0002
Ghir_D09G009210	PCP	3.21511	5e-05	2.99221	5e-05			Ghir_D12G006290	ALFP2	-3.24483	0.0009	0.351837	0.00025
Ghir_D09G010980	ORG2	4.57136	0.00045	4.2468	0.00075			Ghir_D12G009700	DJC76	-5.09683	5e-05	0.360649	5e-05
Ghir_D09G014440	PDR2	2.0108	5e-05	2.34516	5e-05			Ghir_D12G012570	ATHB7	-2.73918	5e-05	2.35807	5e-05
Ghir_D09G016990	PDC1	3.64904	5e-05	2.31116	5e-05			Ghir_D12G012900	LHY	-2.06751	0.0004	2.82467	5e-05
Ghir_D09G019150	NAC43	2.55604	5e-05	2.99528	5e-05			Ghir_D12G013960	GATL7	-2.28542	5e-05	0.952554	5e-05
Ghir_D09G021510	CHI5	2.27832	5e-05	4.75029	5e-05			Ghir_D12G013990	DNJB6	-3.25542	5e-05	0.400662	5e-05
Ghir_D09G021890	NLTP3	2.38192	0.0033	3.6445	0.0002			Ghir_D12G016390	HIP20	-2.27532	0.00155	-4.74738	5e-05
Ghir_D09G023620	FBT9	2.96713	0.00015	2.5158	0.00065			Ghir_D12G019090	CDF3	-3.1608	5e-05	9.46521	5e-05
Ghir_D10G003050	LRK71	2.34578	0.0004	3.40225	0.0001			Ghir_D12G019230	Y5613	-2.76035	0.0002	0.173383	0.00035
Ghir_D10G003580	CLE1	4.56659	0.0026	4.95194	0.00265			Ghir_D12G019990	C71AQ	-2.97295	5e-05	6.26443	5e-05
Ghir_D10G003790	GDL14	2.61731	0.00505	4.1096	0.00065			Ghir_D12G020670	SWT10	-2.07178	5e-05	0.886034	5e-05
Ghir_D10G005340	Y1561	4.29203	5e-05	2.65365	5e-05			Ghir_D12G023300	21KD	-3.24283	0.0004	0.290633	0.00105
Ghir_D10G005860	BIG1B	2.80977	5e-05	2.41409	5e-05			Ghir_D12G025850	HIP9	-2.17825	5e-05	3.01504	5e-05
Ghir_D10G006080	LOX31	2.29919	5e-05	4.50732	5e-05			Ghir_D12G026470	SWET3	-2.48499	5e-05	4.26993	5e-05
Ghir_D10G007790	NPH3	2.00102	0.0004	2.40764	0.00015			Ghir_D12G026480	SIGE	-5.82733	5e-05	5.63156	5e-05
Ghir_D10G011010	Y1501	2.21441	5e-05	3.33695	5e-05			Ghir_D12G027150	LTI65	-3.89693	0.00635	-7.21819	0.00025
Ghir_D10G012300	NLTP2	4.87355	5e-05	6.52984	5e-05			Ghir_D12G027630	BH126	-2.67772	0.0073	0.302398	0.01095
Ghir_D10G013060	CHI5	2.61279	5e-05	9.00442	5e-05			Ghir_D12G028710	RVE7	-4.89754	5e-05	3.65622	5e-05
Ghir_D10G016530	PPCK1	2.02907	5e-05	2.50635	5e-05			Ghir_D13G004420	GH31	-2.2144	5e-05	2.37519	5e-05
Ghir_D10G016760	MYB15	3.0601	0.00025	2.79799	0.00035			Ghir_D13G006460	COL12	-2.44981	0.0004	0.197431	5e-05
Ghir_D10G018780	BEV1E	3.44943	5e-05	2.29506	5e-05			Ghir_D13G007270	HHO3	-2.25315	5e-05	5.95733	5e-05
Ghir_D10G018830	PRU1	3.14335	5e-05	6.50736	5e-05			Ghir_D13G010570	BZP43	-3.95465	5e-05	0.781672	5e-05
Ghir_D10G018880	BEV1A	2.54455	5e-05	4.10038	0.00015			Ghir_D13G013880	MTP10	-2.68989	5e-05	2.34252	5e-05
Ghir_D10G019380	U73C2	2.40684	0.00075	4.11016	5e-05			Ghir_D13G013900	44472	-2.51928	0.0022	-5.57757	0.0001
Ghir_D10G019570	BOR4	2.79386	5e-05	2.37229	5e-05			Ghir_D13G016300	MTEF6	-2.1714	5e-05	0.605484	5e-05
Ghir_D11G000670	PCR6	2.19468	5e-05	2.43549	5e-05			Ghir_D13G017480	BEBT	-2.17618	0.005	0.213482	0.0019
Ghir_D11G000820	C76C1	3.71381	5e-05	2.82853	5e-05			Ghir_D13G019980	COL4	-2.9301	5e-05	1.3457	5e-05
Ghir_D11G001290	WRK27	3.95056	0.0008	3.15838	0.003			Ghir_D13G020240	LBP65	-2.5433	5e-05	1.3802	5e-05
Ghir_D11G001640	APRR5	2.80461	5e-05	3.77562	5e-05			Ghir_D13G023080	COL5	-3.46014	5e-05	4.96427	5e-05
Ghir_D11G001800	STAR7	2.23323	5e-05	4.83975	5e-05			Ghir_D13G023540	YV023	-2.95288	5e-05	2.57824	5e-05
Ghir_D11G002960	BAM3	2.08407	5e-05	3.63028	5e-05			Ghir_D13G023860	EPHA	-2.93448	5e-05	9.94814	5e-05
Ghir_D11G003610	MDHP	3.17986	5e-05	2.85229	5e-05			Ghir_D13G024350	MRS2B	-2.31782	5e-05	0.937934	5e-05
Ghir_D11G004430	GAOXL	2.21555	5e-05	2.33239	5e-05			Ghir_D13G025490	HSP70	-2.8733	5e-05	1.68644	5e-05
Ghir_D11G005460	XTH7	3.71787	0.0053	5.11957	0.00585			Ghir_D13G025560	SLP1	-2.91618	5e-05	1.11403	5e-05
Ghir_D11G007700	LAML	3.31018	5e-05	2.86733	0.0001
Ghir_D11G011090	PALD	2.75304	5e-05	3.8583	0.00015
Ghir_D11G011500	GDL2	2.23984	5e-05	2.17721	5e-05
Ghir_D11G011560	POLR2	2.8321	5e-05	2.84615	5e-05
Ghir_D11G013780	WTR31	3.33636	0.0042	4.15348	0.00135
Ghir_D11G015680	HIP46	2.04409	5e-05	2.23105	0.00065
Ghir_D11G016450	CSLH1	2.06834	5e-05	2.02669	0.00015
Ghir_D11G016480	HEM61	2.06476	5e-05	3.67945	0.0003
Ghir_D11G016500	PRF1	2.62471	5e-05	7.14303	0.0003
Ghir_D11G019220	DH11	3.82907	5e-05	2.7192	5e-05
Ghir_D11G019620	TAUE3	5.20017	0.0029	4.1321	0.00505
Ghir_D11G020140	MES10	2.55389	0.0009	2.87665	0.0014
Ghir_D11G024240	LSH10	2.1191	5e-05	2.62879	5e-05
Ghir_D11G026490	GL114	5.64528	0.00045	3.6812	0.00135
Ghir_D11G026500	GL17	3.55329	0.00075	2.84009	0.00125
Ghir_D11G028540	ERDL5	2.36861	5e-05	2.05324	5e-05
Ghir_D11G029760	NAS	2.70717	5e-05	3.54467	5e-05
Ghir_D11G031870	LRK91	2.3449	0.00035	3.16149	0.0001
Ghir_D12G000990	SRC2	2.79303	0.00035	4.73619	5e-05
Ghir_D12G001720	NIC1	3.25582	5e-05	2.75689	5e-05
Ghir_D12G002630	MEE14	2.66822	5e-05	4.8037	5e-05
Ghir_D12G005130	PYRG	2.86366	5e-05	2.56489	5e-05
Ghir_D12G005490	LBD41	2.52999	5e-05	2.11777	5e-05
Ghir_D12G005790	C81D1	2.32128	5e-05	5.09097	0.00025
Ghir_D12G006490	SAMT	2.1077	5e-05	2.07295	0.0001
Ghir_D12G008060	MTDH	3.31283	5e-05	4.5499	5e-05
Ghir_D12G011530	BAP2	2.79125	5e-05	4.15545	5e-05
Ghir_D12G012960	WTR24	2.38321	5e-05	2.52949	5e-05
Ghir_D12G013400	NIMI1	2.52494	5e-05	4.51821	0.00065
Ghir_D12G015640	GIS3	2.43632	5e-05	2.71445	0.00015
Ghir_D12G016080	ALB4	2.22876	5e-05	2.15553	5e-05
Ghir_D12G016240	FBK28	2.47014	5e-05	2.89763	5e-05
Ghir_D12G018050	STT7	2.46525	5e-05	2.79895	5e-05
Ghir_D12G023310	PMEI9	2.24187	5e-05	2.06515	5e-05
Ghir_D12G023830	ERF25	3.5158	0.0001	3.63098	0.0001
Ghir_D12G027280	CASL2	3.56636	5e-05	2.88785	5e-05
Ghir_D13G000870	WRK54	4.44721	5e-05	3.00687	5e-05
Ghir_D13G001330	PTR47	4.21463	0.0057	3.6157	0.0069
Ghir_D13G001340	PTR14	2.08004	0.00095	2.65411	0.00065
Ghir_D13G002020	U91C1	2.72994	5e-05	2.36802	5e-05
Ghir_D13G002070	BBE26	2.27248	0.0005	6.01156	5e-05
Ghir_D13G002150	DOF36	2.0558	0.0005	2.46944	5e-05
Ghir_D13G002770	VSPA	2.56293	5e-05	3.086	5e-05
Ghir_D13G003050	GUN24	2.57874	0.0003	2.42537	0.0003
Ghir_D13G003430	GRP1	2.37223	5e-05	2.23852	5e-05
Ghir_D13G011640	BEBT	2.61966	0.0077	2.42821	0.01135
Ghir_D13G011930	LOX15	2.65269	5e-05	3.22372	5e-05
Ghir_D13G014200	RFS1	2.43008	5e-05	2.44293	5e-05
Ghir_D13G015260	TRPB	2.59358	0.00055	3.53752	5e-05
Ghir_D13G019110	ERDL8	2.57006	0.00035	4.50256	5e-05
Ghir_D13G021700	RHA1A	2.3648	5e-05	2.76827	5e-05
Ghir_D13G023530	FP1V1	3.67519	0.00055	3.14843	0.001
Ghir_D13G025490	HSP70	2.01114	5e-05	5.44539	0.00025
